# Supplementary material for: Adaptive evolution of an essential telomere protein restricts telomeric retrotransposons
Source: eLife. 2020 Dec 22;9:e60987. doi: 10.7554/eLife.60987 (PMC7755394; doi:10.7554/eLife.60987)
Supplement: Figure 2—source data 1. [file elife-60987-fig2-data1.xlsx]

## Sheet: Sheet1
Figure 2–Source Data 1. DESeq output from analysis of total RNA-seq.
TE_consensus	baseMean	log2FoldChange	p-value adjusted	log2(normalized_expression_cav[mel]_rep1)	log2(normalized_expression_cav[mel]_rep2)	log2(normalized_expression_cav[mel]_rep3)	log2(normalized_expression_cav[yak]_rep1)	log2(normalized_expression_cav[yak]_rep2)	log2(normalized_expression_cav[yak]_rep3)
ACCORD2_I	963.673	-0.0575305	0.800859	9.75666	10.1022	9.79705	9.73571	9.90334	9.80197
ACCORD2_LTR	54.5253	-0.170391	0.76408	6.02511	6.3222	5.29128	5.95236	5.91944	5.2528
ACCORD_I	1063.21	0.0734723	0.74578	9.88275	10.255	9.74772	10.2299	10.0372	9.78898
ACCORD_LTR	152.806	-0.14267	0.675574	7.13483	7.57473	7.45193	7.3222	7.24302	7.13877
BAGGINS1	2565.08	0.00580932	0.961723	11.4348	11.5034	11.2288	11.4651	11.3587	11.3224
BARI1	144.317	-0.95241	2.66166e-06	7.49413	7.81339	7.24272	6.77515	6.35882	6.49154
BARI_DM	233.704	0.399641	0.0501016	7.7579	7.72985	7.67181	7.97931	8.22326	8.1056
BATUMI_I	2679.25	0.269059	0.0382013	11.2669	11.2711	11.0358	11.5342	11.4013	11.4046
BATUMI_LTR	138.087	-0.264499	0.365767	7.16229	7.58623	7.15574	7.17263	7.17119	6.69501
BEL-10_DEl-I	0.630262	-1.40874	NA	0.0189735	0.833333	0	0.0189735	0	0
BEL-10_DWil-I	0	NA	NA	0	0	0	0	0	0
BEL-11_DBp-I	0	NA	NA	0	0	0	0	0	0
BEL-11_DEl-I	30.5608	0.262829	0.682256	4.95236	4.89478	4.74379	5.45193	4.89478	4.95024
BEL-13_DTa-I	7.32629	-0.518143	0.681977	2.76233	3.1889	3.15526	2.53994	2.60394	2.4183
BEL-14_DP-I	1.00252	-3.43809	NA	0.0368002	1.04335	1.67934	0	0	0
BEL-19_DAn-I	11.1667	0.952276	0.230525	3.01897	2.83333	2.76233	3.82633	3.74022	3.86186
BEL-1_DPer-I	0	NA	NA	0	0	0	0	0	0
BEL-1_DRh-I	7.65037	-0.890849	0.402338	3.60394	3.15526	2.95497	2.01897	1.83333	2.95497
BEL-21_DTa-I	0.51568	0.919782	NA	0	0	-0.0450267	0	0	0.954973
BEL-21_DWil-I	0	NA	NA	0	0	0	0	0	0
BEL-2_DAn-I	14.6886	-1.48476	0.0202372	4.53377	4.2769	4.2669	2.15526	3.53994	2.60394
BEL-2_DSe-I	2121.44	0.101008	0.621511	11.0749	10.9919	10.7607	11.1964	10.9464	10.9514
BEL-2_DSe-LTR	154.693	-0.249103	0.412191	7.55905	7.51223	7.29419	7.30074	7.4163	6.81816
BEL-2_Deu-I	0.959903	1.0815	NA	0	0.954973	0	0.833333	-0.0450267	0.0189735
BEL-3_DEl-I	0.148483	-0.948564	NA	0	0.0189735	0	0	0	0
BEL-3_DYa-I	78.2629	-0.551019	0.0572651	6.56968	6.61889	6.2596	6.04244	6.06337	5.64069
BEL-3_DYa-LTR	0	NA	NA	0	0	0	0	0	0
BEL-3_Deu-I	1.46025	-1.76775	NA	0	1.83333	1.53994	0.0189735	-0.166667	0
BEL-4_DEl-I	2.45624	2.07697	0.298235	0	1.53994	0	1.4183	1.53994	2.60394
BEL-4_DFi-I	4.49527	1.03028	0.501614	1.01897	1.83333	1.53994	1.60394	1.4183	3.53994
BEL-4_DYa-I	26.6362	-0.208753	0.766102	4.90917	5.14826	4.22565	4.47854	4.60394	4.58822
BEL-5_DEu-I	18.3686	-0.163794	0.84096	4.28473	4.56691	4.18184	4.42912	4.21327	3.79482
BEL-5_DFi-I	0	NA	NA	0	0	0	0	0	0
BEL-6_DWil-I	6.33456	-0.454512	0.74578	2.67934	2.84416	3.21327	2.90173	2.62176	1.62831
BEL-6_DYa-I	667.157	-0.0526006	0.811478	9.42482	9.64883	9.35176	9.50032	9.38765	9.33755
BEL-6_DYa-LTR	7.78204	0.241134	0.841119	3.1889	1.4183	3.1249	2.82633	3.00326	3.1249
BEL-8_DAn-I	0.330418	1.85848	NA	0	0	0	0.0189735	0	-0.0450267
BEL-8_DPe-I	0.332518	1.86536	NA	0	0	0	-0.166667	-0.0450267	0
BEL2-I_Dya	7.67468	-0.498582	0.691488	3.55381	3.0368	3.04335	2.90173	3.0368	2.04335
BEL_I	7564.75	0.535327	4.30701e-05	12.5981	12.8617	12.5185	13.1096	13.0106	13.4046
BEL_LTR	513.297	0.576681	0.000892782	8.6263	8.78753	8.47461	9.11701	8.94447	9.47854
BLASTOPIA_I	2281.3	-0.238599	0.230525	10.9907	11.2559	11.3798	10.8845	10.7207	11.2502
BLASTOPIA_LTR	188.404	-0.276995	0.32191	7.57819	7.8247	7.84425	7.33278	7.2752	7.73684
BLOOD_I	4638.11	-1.27086	5.82504e-17	12.5048	12.5992	12.7122	11.5381	11.2217	11.2454
BLOOD_LTR	285.786	-1.33344	1.91044e-15	8.71979	8.92905	8.57819	7.12426	7.45274	7.57819
BS	1302.29	-0.353978	0.0102875	10.3831	10.46	10.5201	10.2063	10.0083	10.0569
BS2	2125.24	0.196887	0.16475	10.9465	11.2416	10.8697	11.3072	11.1181	11.1795
BS3_DM	413.347	-0.172673	0.426202	8.60152	8.98288	8.56587	8.44066	8.64497	8.51083
BS4_DM	20.3299	0.142235	0.841119	4.3423	4.68066	3.95024	4.61794	4.49623	4.29128
BURDOCK_I	1176.96	-0.88703	3.97704e-12	10.4598	10.7789	10.3292	9.84372	9.48045	9.52158
BURDOCK_LTR	118.796	0.315258	0.27138	6.59139	7.14138	6.61794	7.18655	7.07677	7.02511
Bica_I	1045.18	-0.245726	0.103621	10.1288	10.1291	10.0197	9.96734	9.80488	9.71984
Bica_LTR	54.9689	-0.0151611	0.961723	5.65806	6.16047	5.73724	5.99755	5.8223	5.65151
CIRCE	1130.35	0.133457	0.433902	9.82627	10.253	9.97753	10.1291	10.1211	10.1687
COPIA2I_DM	694.983	0.0272749	0.898474	9.64127	9.5186	9.31014	9.48884	9.56036	9.46961
COPIA2LTR_DM	72.8057	-0.850262	0.00669045	6.47854	6.93784	6.02316	5.08426	5.97317	5.69131
COPIA_DM_I	8586.74	1.27212	1.70022e-10	12.252	12.3517	12.4686	14.0557	12.9752	13.6651
COPIA_DM_LTR	429.355	0.973298	1.40362e-06	8.05789	8.07174	8.22644	9.55035	8.48079	9.10979
CR1-1_DEu	0	NA	NA	0	0	0	0	0	0
CR1-1_DF	0.494841	0.875544	NA	0.0433495	0	0	1.04335	0	0
CR1-2_DAn	3.84585	0.385845	0.832576	1.4183	1.53994	2.01897	2.15526	2.76233	0.0189735
CR1-2_DEu	2.0401	-0.00254117	NA	1.01897	-0.166667	1.53994	0.0189735	1.83333	-0.0450267
CR1-2_DF	12.1886	-0.518327	0.5884	4.04335	3.67934	3.94369	3.74379	3.2643	3.0368
CR1-2_DK	0.333296	0.0132221	NA	-0.166667	0	0	-0.166667	0	0
CR1-2_DRh	22.4752	-0.345338	0.647274	4.65541	4.77386	4.3569	3.86186	4.71941	4.00326
CR1-3_DAn	0	NA	NA	0	0	0	0	0	0
CR1-5_DEl	0	NA	NA	0	0	0	0	0	0
Chimpo_I	628.008	0.300082	0.0505157	8.93137	9.29705	9.01615	9.29481	9.45681	9.34989
Chimpo_LTR	45.372	0.284537	0.621511	5.00127	5.81816	5.36528	6.13877	5.42912	5.43567
Chouto_I	655.309	-0.473982	0.00053543	9.50572	9.84393	9.19966	9.11736	9.08506	8.89403
Chouto_LTR	115.365	-0.186623	0.628049	7.00258	7.32875	6.64897	6.97931	6.56691	6.86256
Copia-1_DBi-I	10.5653	-0.595413	0.555514	3.53994	3.47841	3.74022	2.2769	3.01897	3.4183
Copia-1_DFi-I	2.32145	-0.393475	0.843751	1.53994	1.60394	0.833333	0.954973	1.60394	-0.166667
Copia-1_DGri-I	0.177934	-0.948564	NA	0	0	-0.0450267	0	0	0
Copia-1_DPer-I	1.15649	2.4997	NA	0	-0.0450267	0	-0.166667	-0.0450267	2.01897
Copia-1_DSe-I	397.542	-0.217769	0.27138	8.566	8.90162	8.58153	8.4185	8.56972	8.36861
Copia-1_DSe-LTR	27.3825	-0.21173	0.766102	4.49623	5.13081	5.13877	4.73724	4.29128	5.04857
Copia-1_DSim-I	331.654	0.120028	0.647884	8.28576	8.36471	8.11988	8.53073	8.086	8.46673
Copia-1_DSim-LTR	16.9404	0.396349	0.647274	3.62831	4.55381	3.49623	4.56691	3.90173	4.42912
Copia-1_DYa-I	53.4838	0.0832681	0.850693	5.2596	6.1249	5.47841	5.61469	5.76233	5.77386
Copia-1_DYa-LTR	0	NA	NA	0	0	0	0	0	0
Copia-2_DAn-I	4.43367	-0.462527	0.807163	2.15526	0.954973	3.01897	-0.166667	0.954973	3.01897
Copia-2_DBp-I	1.97873	-0.461499	NA	0.954973	1.60394	0.833333	0.954973	1.01897	-0.166667
Copia-2_DTa-I	4.10367	0.381779	0.833175	2.4183	2.2769	0	2.4183	2.2769	1.60394
Copia-2_DYa-I	215.823	1.06776	2.03517e-10	7.01897	7.18206	6.99937	8.23814	7.91548	8.21236
Copia-2_DYa-LTR	0.177934	-0.948564	NA	0	0	0.0368002	0	0	0
Copia-3_DAn-I	1.98718	1.03373	NA	-0.0450267	1.01897	-0.166667	0.954973	1.01897	1.83333
Copia-3_DBp-I	372.322	-0.249019	0.32191	8.90162	8.42952	8.43879	8.31818	8.45172	8.22176
Copia-3_DEu-I	3.47645	-0.681851	0.712617	2.04335	2.4163	2.0368	1.62831	1.67934	1.0368
Copia-4_DMoj-I	0	NA	NA	0	0	0	0	0	0
Copia-5_DAn-I	0	NA	NA	0	0	0	0	0	0
Copia-6_DAn-I	0.171751	-0.948564	NA	0.0943764	0	0	0	0	0
Copia1-I_DM	916.713	0.723856	2.18274e-06	9.28947	9.54519	9.64512	10.4216	9.99755	10.1937
Copia1-LTR_DM	220.186	-0.145088	0.672062	7.58153	7.67607	8.07967	7.67882	7.50187	7.72633
DEC1_DS	25156.2	-0.145629	0.84096	14.4349	14.3972	15.206	14.5769	14.1712	14.9455
DIVER2_I	328.07	-0.303861	0.104306	8.54254	8.50929	8.28589	8.27636	8.09543	8.01026
DIVER2_LTR	171.593	-0.212259	0.426202	7.3832	7.85593	7.52865	7.37427	7.33278	7.39435
DIVER_I	10233.4	-0.370128	0.00119178	13.2363	13.6902	13.3893	12.9856	12.9742	13.2051
DIVER_LTR	209.195	-0.233795	0.32191	7.74543	8.08119	7.83125	7.7668	7.51253	7.64326
DM1731_I	463.097	-0.158333	0.469439	8.94082	9.20137	8.46996	8.78152	8.70897	8.62775
DM1731_LTR	37.844	-0.632561	0.135089	5.62176	5.82471	5.30383	5.0368	4.74379	5.04857
DM176	2633.63	-0.111322	0.555514	11.5366	11.353	11.1874	11.3622	11.0925	11.2599
DM297_I	4459.72	0.0544044	0.810474	12.0306	12.2463	12.1979	12.3517	12.1625	12.0911
DM297_LTR	546.323	-0.293968	0.141188	9.06455	9.10979	9.33186	8.74622	8.73961	9.10909
DM412B_LTR	97.9809	-0.3978	0.162332	7.01324	6.93162	6.64326	6.50377	6.35873	6.50278
DM412_I	8990.33	0.164268	0.464331	12.8596	13.1776	12.9358	13.4266	12.882	13.0804
DM412_LTR	80.5125	0.0386283	0.914454	6.22662	6.67271	6.22366	6.65151	6.32875	6.2029
DMCR1A	6665.19	0.0569598	0.748298	12.6637	12.6712	12.5222	12.8059	12.5286	12.6539
DMLTR5	137.303	-0.739417	0.00089362	7.53732	7.39435	7.51908	6.64897	6.86969	6.67271
DMRT1A	1958.59	0.256407	0.0547744	10.7401	10.892	10.6042	11.1662	10.807	10.9966
DMRT1B	3021.24	0.0941908	0.621511	11.4966	11.8396	11.4037	11.7602	11.66	11.5628
DMRT1C	434.814	-0.273711	0.116338	8.7037	9.06872	8.74349	8.45172	8.6274	8.57739
DMTOM1_LTR	272.751	-0.130438	0.658427	8.04803	8.26735	8.33755	8.17635	7.86353	8.18184
DNA4-1_DK	0	NA	NA	0	0	0	0	0	0
DOC	8362.35	-0.659466	8.42729e-10	13.3801	13.4615	13.325	12.8371	12.637	12.6725
DOC2_DM	1716.31	-0.142658	0.366343	10.8495	10.7515	10.6769	10.7107	10.4898	10.6114
DOC3_DM	4989.49	-0.173601	0.195239	12.3523	12.5935	12.3629	12.291	12.2774	12.1805
DOC4_DM	424.416	-0.522042	0.000507095	8.62775	9.1448	8.95561	8.30907	8.39792	8.42411
DOC5_DM	1020.98	0.249139	0.0899933	9.90495	10.0921	9.80324	10.258	10.1979	10.0476
DOC6_DM	752.875	0.301281	0.226178	9.24959	9.61143	9.16649	9.51531	9.32959	9.93137
FB4_DM	1636.62	0.123267	0.510596	10.5843	10.8519	10.2331	10.6701	10.6772	10.6543
FROGGER_I	592.996	-0.467736	0.00305536	9.54063	9.58831	9.34704	9.0368	9.13875	8.84257
FROGGER_LTR	126.474	-0.257041	0.367974	7.08506	7.09072	6.97734	6.96149	6.72815	6.64147
FW	7783.61	-0.479802	3.06785e-06	13.2501	13.3416	13.0488	12.7987	12.6908	12.6734
FW2_DM	225.424	0.413469	0.0300968	7.45482	7.80688	7.3569	7.89161	8.04134	7.88318
FW3_DM	246.362	0.239063	0.310019	7.96754	7.8951	7.78786	7.991	8.07126	8.2643
G2_DM	334.746	0.268802	0.14317	8.23329	8.27628	8.0635	8.54254	8.28454	8.51339
G3_DM	198.836	0.104013	0.74578	7.62831	7.88879	7.42912	7.92599	7.55381	7.7233
G4_DM	1538.94	0.385705	0.00208493	10.1997	10.5172	10.2645	10.7515	10.5997	10.7418
G5A_DM	735.09	-0.116842	0.555514	9.62965	9.76982	9.5412	9.63934	9.47767	9.43137
G5_DM	964.278	0.0397454	0.84096	9.80046	10.1392	9.57311	9.88275	9.95414	9.75815
G6_DM	276.433	-0.154007	0.555514	8.34968	8.36076	8.03101	8.06471	8.05458	8.13877
G7_DM	27.2266	-0.104291	0.861359	4.66283	5.2596	4.2029	4.92586	4.29276	4.70986
GTWIN_I	1289.62	-0.986114	6.43742e-12	10.7351	11.2237	10.4355	9.94422	9.74003	9.74588
GTWIN_LTR	131.528	-1.15408	3.18086e-07	7.46269	7.73633	7.09579	6.02316	6.24038	6.55813
GYPSY10_I	1109.17	0.0525686	0.803851	10.136	10.2776	10.056	10.2593	10.1296	10.1982
GYPSY10_LTR	145.845	-0.0636919	0.84096	7.26786	7.3409	6.87773	7.19338	7.1275	6.94186
GYPSY11_I	80.2074	0.509928	0.0966884	5.73724	6.23317	6.3232	6.66616	6.58251	6.58623
GYPSY11_LTR	60.7117	0.0873348	0.841119	5.77386	6.00326	5.68289	5.82633	5.96262	5.88571
GYPSY12A_LTR	199.137	0.126077	0.691488	7.50278	7.80174	7.61423	7.74379	7.57819	7.91332
GYPSY12_I	1158.31	0.135215	0.472492	9.88726	10.2427	10.0316	10.0008	10.3147	10.1989
GYPSY12_LTR	629.495	0.150959	0.503293	9.21332	9.51253	9.13346	9.34467	9.58369	9.32412
GYPSY2_I	1684.84	-0.193056	0.27138	10.8215	11.0736	10.3579	10.5324	10.6124	10.504
GYPSY2_LTR	68.1664	0.240811	0.555514	6.0368	6.10944	5.95236	6.30359	6.1931	6.2842
GYPSY3_I	804.784	-0.0516327	0.811478	9.6914	9.61141	9.566	9.71768	9.45904	9.49607
GYPSY3_LTR	100.312	0.255279	0.434603	6.29128	6.90173	6.52865	6.87624	6.86256	6.73724
GYPSY4_I	2522.89	0.0843958	0.682256	11.0114	11.2976	11.2945	11.2057	11.358	11.2538
GYPSY4_LTR	115.375	0.0283991	0.92475	6.83584	7.0368	6.83777	7.08306	6.84416	6.82471
GYPSY5_I	251.768	-0.240595	0.29675	7.90334	8.46192	7.72208	7.90917	7.79376	7.64711
GYPSY5_LTR	41.2622	-0.395462	0.412191	5.39435	5.95024	5.48669	5.3222	4.74379	5.48669
GYPSY6A_LTR	150.115	-0.222795	0.433902	7.2951	7.24272	7.3037	7.08506	7.07174	6.9662
GYPSY6_I	1647.06	0.511439	2.55678e-05	10.516	10.6746	10.2254	11.0228	10.9414	10.9557
GYPSY6_LTR	123.715	0.12063	0.74578	6.64069	6.92076	6.93784	7.00326	6.89749	6.91379
GYPSY7_I	375.506	-0.0113589	0.953082	8.49952	8.96754	8.3832	8.58222	8.6698	8.54718
GYPSY7_LTR	16.6895	0.342777	0.695717	4.1249	4.2669	2.83333	4.2029	4.10644	4.15526
GYPSY8_I	438.802	-0.251545	0.180914	8.876	9.2601	8.74183	8.73029	8.6654	8.70909
GYPSY8_LTR	103.258	-0.167702	0.678084	6.80033	6.91015	6.4144	6.87695	6.4183	6.2769
GYPSY9_I	379.675	2.1209	3.35105e-07	7.10944	7.29405	7.23647	9.83288	8.51644	9.34514
GYPSY9_LTR	54.7215	0.354598	0.412191	5.74022	5.50956	5.2669	5.98308	5.83762	5.77386
GYPSY_DS	16.5824	-0.107895	0.889709	3.67934	4.28473	4.43567	4.55381	3.20673	4.13081
GYPSY_I	1996.56	-0.62287	3.38255e-07	11.0694	11.4774	11.0101	10.7421	10.4619	10.436
GYPSY_LTR	241.223	0.259368	0.259169	7.65151	8.07677	7.80174	8.07572	7.91987	8.2693
G_DM	488.624	0.141541	0.587914	8.85502	9.01324	8.52483	9.15083	8.89403	8.73961
Galileo_DM	0	NA	NA	0	0	0	0	0	0
Gypsy-10_DBp-I	6.12207	1.45017	0.206923	2.01897	1.83333	0.954973	3.47841	1.4183	3.65541
Gypsy-10_DSim-I	99.0381	-0.441754	0.129512	6.86353	7.2029	6.62176	6.1931	6.60217	6.51253
Gypsy-11_DRh-I	0	NA	NA	0	0	0	0	0	0
Gypsy-11_DSim-I	203.366	0.329888	0.147636	7.19338	7.80688	7.29276	7.92652	7.83915	7.49154
Gypsy-11_DSim-LTR	0.171751	-0.948564	NA	0.0368002	0	0	0	0	0
Gypsy-11_DTa-I	0	NA	NA	0	0	0	0	0	0
Gypsy-12_DEu-I	0	NA	NA	0	0	0	0	0	0
Gypsy-12_DSim-I	213.066	-0.00777781	0.965953	7.56804	7.80046	7.68431	7.64069	7.69644	7.64833
Gypsy-12_DSim-LTR	13.5227	-0.18584	0.84096	3.90173	4.28473	3.50278	3.90173	3.62176	3.62831
Gypsy-12_DTa-I	67.7726	0.457591	0.225319	5.56968	6.04134	5.71598	6.46277	6.51083	5.58822
Gypsy-12_DVir-I	154.827	0.439183	0.098824	6.93784	7.15526	6.84979	7.86446	6.91015	7.37283
Gypsy-13_DAn-I	1.35445	1.54631	NA	0	0	0.833333	0.954973	0	1.83333
Gypsy-13_DBp-I	0.636812	0.122584	NA	0	0.954973	0	0	-0.0450267	0.0189735
Gypsy-13_DSim-I	539.294	-0.337041	0.0300968	9.11964	9.3569	9.05037	8.95266	8.71598	8.81916
Gypsy-13_DSim-LTR	172.474	-0.632664	0.000993135	7.81814	7.93987	7.57596	7.21327	7.1278	7.05917
Gypsy-14_DAn-I	23.2449	-0.305979	0.678084	4.53994	4.54254	4.74022	4.2769	4.47841	4.15526
Gypsy-14_DEu-I	0.355868	-1.92753	NA	0	0	0.954973	0	0	0
Gypsy-15_DBi-I	0.161545	0.974989	NA	0	0	0	0.0189735	0	0
Gypsy-15_DEl-LTR	0.170973	0.974989	NA	0	0	0	0	0.0433495	0
Gypsy-15_DFi-LTR	0	NA	NA	0	0	0	0	0	0
Gypsy-15_DWil-I	1.66617	-1.99569	NA	2.35873	1.04335	0.0943764	0.0368002	0.0433495	0
Gypsy-16_DEl-I	2.11988	-0.649562	NA	1.01897	1.83333	0.954973	1.60394	0.833333	0
Gypsy-17_DBi-I	0	NA	NA	0	0	0	0	0	0
Gypsy-18_DBp-I	5.59039	0.091067	0.939167	2.82633	1.4183	2.53994	1.01897	3.00326	2.53994
Gypsy-18_DEl-I	5.52369	0.815314	0.555514	2.62831	1.67934	1.62176	2.8507	3.2643	2.35873
Gypsy-18_DTa-LTR	0.177934	-0.948564	NA	0	0	-0.166667	0	0	0
Gypsy-1_DAn-I	2.38193	0.408446	0.843751	0.0368002	0.0433495	2.09438	0.0368002	1.62831	2.09438
Gypsy-1_DBi-I	1.67443	-0.0144321	NA	1.04335	0.0943764	1.0368	1.62831	1.09438	0
Gypsy-1_DGri-I	0.168873	0.974989	NA	0	0	0	0	0	0.0943764
Gypsy-1_DSe-I	587.249	0.95528	2.5368e-12	8.76103	8.8223	8.54063	9.57668	9.76857	9.60285
Gypsy-1_DSe-LTR	8.98495	2.00608	0.0172228	1.4183	2.53994	1.01897	3.29276	4.2769	3.60394
Gypsy-1_DSim-I	1834.91	0.202234	0.140665	10.7677	10.9248	10.7211	11.1035	10.8994	10.977
Gypsy-1_DSim-LTR	38.4549	-0.330266	0.55446	5.34729	5.85186	4.83333	4.90917	5.37653	4.74022
Gypsy-1_DTa-I	0.606995	-1.35216	NA	0	1.62831	0	0.0368002	0	0
Gypsy-1_DVir-I	134.912	0.227356	0.501614	6.70156	7.13877	7.18655	7.44423	7.29405	6.94369
Gypsy-20_DBp-I	69.174	0.65524	0.044808	5.55381	6.0368	5.82471	6.48669	6.73724	6.06572
Gypsy-20_DEl-I	0.982413	-0.935568	NA	1.0368	1.04335	0	0	1.04335	0
Gypsy-21_DAn-I	0	NA	NA	0	0	0	0	0	0
Gypsy-22_DAn-I	1.49295	-1.77272	NA	0.0943764	1.62176	1.62831	0	1.0368	0
Gypsy-22_DBp-I	0	NA	NA	0	0	0	0	0	0
Gypsy-22_DEl-I	0	NA	NA	0	0	0	0	0	0
Gypsy-22_DEl-LTR	0	NA	NA	0	0	0	0	0	0
Gypsy-22_DY-I	13.3477	0.222736	0.811478	3.73724	3.50278	3.79482	4.12426	3.95024	3.55381
Gypsy-22_DYa-I	81.5231	-0.214044	0.628049	6.77127	6.61794	6.10289	6.34713	6.24412	6.28473
Gypsy-23_DYa-I	2.12399	-2.43082	NA	1.60394	2.15526	1.53994	0.0189735	-0.166667	0
Gypsy-24_DAn-I	0	NA	NA	0	0	0	0	0	0
Gypsy-24_DEl-I	35.8923	-0.175289	0.780496	5.59139	5.29128	5.00127	5.3222	5.08774	4.95236
Gypsy-24_DY-I	15.4093	-0.588851	0.436481	3.90173	4.84416	3.95024	3.79482	3.62176	3.62831
Gypsy-24_DYa-I	251.016	0.611118	0.000719143	7.77827	7.83125	7.47808	8.17635	8.27217	8.43867
Gypsy-24_DYa-LTR	8.33042	0.377683	0.766102	2.60394	3.00326	2.76233	2.01897	3.00326	3.86186
Gypsy-25_DEl-I	0.310028	0.0132218	NA	0	0.0189735	0	-0.0450267	0	0
Gypsy-25_DYa-I	0.990131	-0.00232733	NA	0.0368002	0.0433495	0.0943764	1.0368	0	0.0943764
Gypsy-26_DBp-I	16.2835	-0.150621	0.850693	4.00127	3.73724	4.56691	4.09438	4.0368	3.8507
Gypsy-26_DPse-I	19.3325	0.544113	0.418618	4.04335	4.4163	3.62176	4.90133	4.3423	4.42912
Gypsy-26_DPse-LTR	0.831052	0.641889	NA	-0.166667	-0.0450267	0	0	0.954973	0.0189735
Gypsy-26_DYa-I	156.178	-0.26205	0.302455	7.37665	7.57473	7.48669	7.21671	7.12017	7.27429
Gypsy-26_DYa-LTR	70.611	-0.3857	0.266344	6.1889	6.30907	6.29482	5.87695	5.87773	5.83762
Gypsy-27_DYa-I	125.706	0.262222	0.399879	6.87384	7.13791	6.29276	6.92076	7.19888	6.96262
Gypsy-27_DYa-LTR	10.0449	0.114715	0.903745	2.84416	3.36528	3.67934	2.62176	3.95024	3.4163
Gypsy-28_DAn-I	1.15416	-1.27231	NA	1.60394	0.833333	0	0	0.833333	0
Gypsy-28_DBp-I	11.5647	-0.416503	0.710137	2.83333	4.4144	3.47841	3.74022	2.2769	3.3409
Gypsy-28_DYa-I	0	NA	NA	0	0	0	0	0	0
Gypsy-29_DAn-I	13.0695	0.524199	0.561962	3.55381	3.0368	3.74379	4.18184	4.12426	3.62831
Gypsy-29_DYa-I	8.8496	-0.0530319	0.95257	1.4183	3.1249	3.92586	3.29276	3.1249	2.60394
Gypsy-2_DBp-I	8.51653	-0.287486	0.817447	3.15526	3.86186	2.01897	2.15526	2.53994	3.60394
Gypsy-2_DRh-I	0.630262	-1.40874	NA	-0.166667	0.954973	0	-0.166667	0	0
Gypsy-2_DSe-I	502.652	-0.424906	0.0084333	8.90626	9.48862	8.934	8.68289	8.83915	8.50576
Gypsy-2_DSe-LTR	7.89329	-0.564914	0.658427	3.0368	2.8507	3.79482	3.0368	3.04335	1.67934
Gypsy-2_DSim-I	255.93	-0.925171	1.56152e-08	8.3409	8.51633	8.13488	7.55813	7.30094	7.33001
Gypsy-2_DSim-LTR	98.32	-0.0770608	0.841119	6.74379	7.08306	6.30359	6.68721	6.39816	6.79169
Gypsy-30_DWil-I	757.754	0.674668	4.74478e-08	9.04279	9.2926	9.0661	9.72512	9.74288	9.91833
Gypsy-30_DWil-LTR	0	NA	NA	0	0	0	0	0	0
Gypsy-31_DEl-I	22.1342	0.506458	0.426202	4.08126	4.59883	3.60394	4.64069	4.70986	4.54254
Gypsy-31_DYa-I	24.9922	-0.114897	0.850693	4.47719	4.90917	4.54254	4.58822	4.2769	4.66283
Gypsy-32_DEl-I	6.41957	0.539258	0.710137	2.01897	2.64069	2.2769	3.71941	2.64069	1.53994
Gypsy-33_DEl-I	18.9838	0.306454	0.712617	4.2643	3.94369	4.21327	4.95236	4.12426	4.13081
Gypsy-34_DEl-I	12.3569	-1.33623	0.058128	4.08126	3.86186	4.2669	3.15526	2.53994	2.3409
Gypsy-37_DEl-I	0.310028	0.0132218	NA	0	-0.166667	0	0.0189735	0	0
Gypsy-38_DAn-I	23.4138	0.247204	0.742571	4.55381	4.68066	4.21327	4.61794	4.73724	4.79824
Gypsy-39_DAn-I	0.687431	-0.0248638	NA	-0.166667	0	0.0189735	0	0	1.01897
Gypsy-3_DKi-I	83.7005	0.199224	0.628049	6.41184	6.45274	6.18184	6.62176	6.3832	6.60217
Gypsy-3_DSe-I	0.170973	0.974989	NA	0	0	0	0	0.0433495	0
Gypsy-3_DSe-LTR	0	NA	NA	0	0	0	0	0	0
Gypsy-3_DSim-I	5.61665	-1.67804	0.135089	3.21327	3.4163	2.84416	1.04335	1.09438	2.0368
Gypsy-3_DSim-LTR	0	NA	NA	0	0	0	0	0	0
Gypsy-40_DAn-I	19.2955	0.983515	0.098824	2.84416	4.50278	3.55381	4.73724	4.79824	4.67934
Gypsy-44_DWil-I	0.319456	0.0132219	NA	0	0.0433495	0	0	0.0433495	0
Gypsy-47_DEl-I	4.84774	-0.300832	0.84096	2.90173	2.0368	2.36528	2.67934	2.35873	1.04335
Gypsy-4_DBi-I	214.468	0.223893	0.358827	7.77386	7.74416	7.56691	8.08306	7.89478	7.72985
Gypsy-4_DBi-LTR	5.95931	-0.450402	0.761024	2.76233	3.1889	2.15526	0.954973	2.60394	2.64069
Gypsy-4_DRh-I	1.16303	-0.406339	NA	1.62176	0.0433495	0	0.0368002	0	1.09438
Gypsy-4_DSe-I	1979.28	0.660149	1.47567e-09	10.6414	10.824	10.4859	11.2847	11.2891	11.3182
Gypsy-4_DSe-LTR	115.215	0.688937	0.00241736	6.30907	6.53994	6.37653	7.08126	6.89749	7.25738
Gypsy-4_DSim-I	1642.68	-0.0886575	0.647274	10.7826	10.8721	10.7237	10.8172	10.618	10.6377
Gypsy-4_DSim-LTR	181.664	-0.372096	0.0834969	7.57703	7.82633	7.46996	7.33868	7.34989	7.02316
Gypsy-50_DWil-I	38.857	-0.00608047	0.984455	5.5352	5.22366	5.24625	5.5352	5.48669	4.89478
Gypsy-53_DWil-I	0	NA	NA	0	0	0	0	0	0
Gypsy-57_DWil-I	2.03187	0.471549	NA	0	-0.166667	1.95497	1.01897	0.833333	1.53994
Gypsy-57_DWil-LTR	1.80689	0.843727	NA	1.04335	1.09438	0	1.62831	1.67934	0.0368002
Gypsy-5_DAn-I	5.47008	-0.247858	0.850693	3.1889	2.4183	1.53994	2.60394	2.15526	1.95497
Gypsy-5_DEl-I	0	NA	NA	0	0	0	0	0	0
Gypsy-5_DEl-LTR	0	NA	NA	0	0	0	0	0	0
Gypsy-5_DEr-LTR	7.7317	-0.243989	0.84096	2.64069	2.76233	3.47841	2.15526	3.4144	2.3409
Gypsy-5_DKi-I	32.1798	0.080624	0.882099	4.99755	4.95236	5.12426	5.2528	4.73823	5.24625
Gypsy-5_DSe-I	405.237	0.200055	0.30563	8.58638	8.77737	8.51658	8.80822	8.92092	8.70569
Gypsy-5_DSe-LTR	2.96929	-2.32443	0.183216	2.4183	2.2769	2.01897	1.4183	0	0
Gypsy-5_DSim-I	12.8549	-0.0460334	0.950211	3.67934	4.20673	3.36528	3.90173	3.73724	3.50278
Gypsy-5_DSim-LTR	0	NA	NA	0	0	0	0	0	0
Gypsy-5_DWil-I	11.8385	-0.780902	0.3329	4.18184	3.84416	3.8507	3.09438	3.0368	3.36528
Gypsy-62_DWil-I	3.65447	0.549439	0.766102	2.35873	1.62831	0.0943764	2.0368	1.62831	2.67934
Gypsy-6_DEl-I	0.630262	-1.40874	NA	0.0368002	1.04335	0	0.0368002	0	0
Gypsy-6_DEl-LTR	0	NA	NA	0	0	0	0	0	0
Gypsy-6_DEu-I	6.14272	0.234355	0.850693	2.8507	2.4163	2.35873	3.36528	1.09438	3.0368
Gypsy-6_DRh-I	2.50635	-0.995616	0.647274	1.67934	1.62176	2.04335	1.09438	1.0368	0.0433495
Gypsy-6_DSe-I	1280.23	0.345822	0.0053029	10.0785	10.3517	10.1885	10.5981	10.4665	10.5528
Gypsy-6_DSe-LTR	51.6498	0.438092	0.27138	5.2669	5.71598	5.16443	5.82633	5.78753	5.86186
Gypsy-6_DSim-I	618.922	-0.664619	6.62496e-06	9.38097	9.96474	9.54261	9.08774	8.98616	8.79169
Gypsy-6_DSim-LTR	5.70369	0.343542	0.811478	1.83333	1.95497	2.82633	2.4183	2.53994	2.82633
Gypsy-6_DVir-I	0	NA	NA	0	0	0	0	0	0
Gypsy-7_DBi-I	8.48215	0.761943	0.450069	3.0368	2.62831	2.4163	3.73724	3.21327	3.4163
Gypsy-7_DEl-I	51.2785	-9.12242	1.59343e-12	6.66423	7.12426	6.41839	0	0	0
Gypsy-7_DEu-I	0.330418	1.85848	NA	0	0	0	0.0368002	0	0.0943764
Gypsy-7_DEu-LTR	0	NA	NA	0	0	0	0	0	0
Gypsy-7_DFi-I	3.54841	-1.37292	0.403023	2.04335	3.2643	1.62176	1.62831	0	1.62176
Gypsy-7_DSe-I	293.094	-0.655754	8.61044e-05	8.5352	8.84592	8.26562	7.83125	8.00127	7.81816
Gypsy-7_DSe-LTR	33.3617	0.0604332	0.911027	4.47719	5.47854	4.87695	4.69131	4.90917	5.41129
Gypsy-7_DSim-I	133.247	-0.443328	0.0572651	7.31354	7.51253	7.16229	6.92727	6.93162	6.7576
Gypsy-7_DSim-LTR	20.105	-0.698731	0.27138	3.86186	5.10644	4.58822	3.95497	3.60394	4.00326
Gypsy-7_DTa-I	0	NA	NA	0	0	0	0	0	0
Gypsy-7_DVir-I	3.49206	-0.679258	0.712617	1.62831	2.4163	2.35873	1.04335	2.09438	1.0368
Gypsy-8_DSe-I	1.70223	-0.60207	NA	0.0368002	0.0433495	2.09438	0.0368002	0.0433495	1.09438
Gypsy-8_DSe-LTR	0	NA	NA	0	0	0	0	0	0
Gypsy-8_DSim-I	128.526	-0.0160271	0.95257	6.97409	7.50377	6.7233	7.02063	6.97702	7.15574
Gypsy-9_DBp-I	0.171751	-0.948564	NA	0.0189735	0	0	0	0	0
Gypsy-9_DRh-I	0	NA	NA	0	0	0	0	0	0
Gypsy-9_DSim-I	1791.27	0.612798	1.273e-07	10.348	10.4815	10.4048	10.9581	10.9536	11.1255
Gypsy-9_DSim-LTR	232.144	0.467363	0.0167844	7.86256	7.59904	7.5352	8.2185	8.05361	8.10944
Gypsy1-I_DM	2795.32	-1.92263	1.53598e-08	11.719	11.9516	12.3382	10.3473	9.93186	10.0537
Gypsy1-LTR_DM	41.8756	-0.280258	0.64093	5.90173	5.12426	5.59794	5.48669	5.12426	5.2528
Gypsy10-I_Dpse	4.44671	0.797143	0.628049	1.4183	2.2769	1.01897	2.4183	1.53994	3.01897
Gypsy10-I_Dya	1.94562	0.558342	NA	0	2.0368	0.0433495	1.09438	1.62176	1.04335
Gypsy11-I_Dya	70.2177	0.218655	0.645666	6.08774	6.00127	6.14532	6.48629	6.4163	5.91944
Gypsy11-LTR_Dya	5.22691	-0.276435	0.841119	2.67934	2.0368	2.8507	1.67934	2.84416	2.04335
Gypsy12-I_Dya	227.532	-0.0306567	0.898872	7.7579	8.08227	7.89528	7.90099	7.78482	7.92092
Gypsy13-I_Dya	3.65327	0.281595	0.861359	2.90173	1.62176	0	2.09438	2.0368	2.04335
Gypsy13-LTR_Dya	0.161545	0.974989	NA	0	0	0	0.0368002	0	0
Gypsy15-I_Dya	18.2617	-0.190445	0.811478	4.35873	4.50278	4.18184	4.0368	4.29128	4.09438
Gypsy16-I_Dya	2.67877	0.345663	0.850693	2.09438	0.0368002	1.04335	2.4163	1.0368	1.04335
Gypsy16-LTR_Dya	4.27763	-0.223181	0.882099	2.35873	2.36528	2.09438	3.20673	1.04335	0.0943764
Gypsy18-I_Dya	14.5712	0.425037	0.647274	3.94369	4.04335	2.90173	3.94369	4.29128	4.09438
Gypsy2-I_DM	1500.4	0.474068	0.000518913	10.4326	10.2289	10.0438	10.7332	10.6623	10.7006
Gypsy2-LTR_DM	184.228	0.447925	0.028288	7.13483	7.62078	7.2842	7.84416	7.71577	7.80174
Gypsy20-I_Dya	170.518	-0.625936	0.0122597	7.80498	8.14664	7.23393	6.88229	7.09863	7.35176
Gypsy20-LTR_Dya	3.08834	-0.729122	0.712617	1.04335	2.90173	1.62176	1.04335	1.09438	1.62176
Gypsy3-I_Dya	6.80171	1.1253	0.283882	2.3409	2.15526	1.53994	3.47841	3.00326	2.95497
Gypsy4-I_Dya	4.48479	0.114981	0.932221	2.4183	1.95497	1.60394	2.4183	1.53994	2.3409
Gypsy4-LTR_Dya	0	NA	NA	0	0	0	0	0	0
Gypsy5-I_Dya	72.5086	-0.0706632	0.861359	5.8557	6.22176	6.37653	6.27628	6.18379	5.66283
Gypsy5-LTR_Dya	4.29903	-0.429702	0.807163	2.0368	2.62831	2.4163	2.35873	2.36528	0.0943764
Gypsy6-I_Dya	0.168873	0.974989	NA	0	0	0	0	0	0.0189735
Gypsy7-I_Dpse	0	NA	NA	0	0	0	0	0	0
Gypsy7-I_Dya	57.7188	-0.764646	0.0172228	5.71598	6.33001	6.30438	5.32519	5.47854	5.22843
Gypsy7-LTR_Dya	13.0829	-1.08371	0.135089	4.28473	4.43567	3.90173	2.35873	3.62831	3.09438
Gypsy8-I_Dya	6.94421	-0.387438	0.766102	3.04335	3.4163	2.62176	2.36528	2.90173	2.62176
Gypsy8-LTR_Dya	0.148483	-0.948564	NA	0	0.0368002	0	0	0	0
Gypsy9-I_Dya	45.4541	-0.766625	0.0404367	5.76472	6.13081	5.8223	5.42912	5.21327	4.61794
Gypsy_6B	1285.21	-0.0503416	0.811478	10.1451	10.5144	10.2333	10.1417	10.3114	10.2466
HELENA_RT	96.2183	-0.358806	0.233417	6.80033	6.7037	6.59883	6.35882	6.38792	6.22176
HELITRON1_DM	3.57946	-0.711534	0.712617	2.04335	1.09438	2.84416	0.0433495	1.67934	2.0368
HETA	10010.2	4.15899	1.90615e-210	10.2172	10.3744	9.7316	14.4983	14.0103	14.2656
HMSBEAGLE_I	3160.56	-0.802129	1.63053e-11	12.0001	12.0203	12.0855	11.1693	11.1918	11.3081
HOBO	703.888	-0.0952009	0.682256	9.46812	9.44251	9.4408	9.39184	9.13254	9.49219
Harbinger-1_DRh	0	NA	NA	0	0	0	0	0	0
Harbinger1_DYa	33.4641	-0.0397572	0.935879	5.16608	5.32875	4.95236	5.3222	5.08774	4.84926
Helena_Ds	160.073	0.109439	0.748298	6.95227	7.5916	7.06337	7.29276	7.35585	7.27636
Helitron-1N1_DVir	11.5628	0.212012	0.84096	3.09438	3.20673	3.95024	3.67934	3.49623	3.8507
Helitron-1N_DF	0	NA	NA	0	0	0	0	0	0
Helitron-1_DEu	42.4014	0.0262501	0.950211	5.19089	5.44683	5.37653	5.32519	5.47854	5.22843
Helitron-1_DF	62.5266	0.308705	0.427902	5.97702	5.94369	5.68721	6.24412	6.20673	6.04335
Helitron-1_DPe	0	NA	NA	0	0	0	0	0	0
Helitron-1_DT	1.01307	0.0149269	NA	0	-0.166667	0.954973	0	-0.166667	0.954973
Helitron-1_DVir	0.340624	0.0132222	NA	0.0433495	0	0	0	0	0.0368002
Helitron-1_DYak	38.0108	0.514322	0.287296	4.83333	4.81295	5.06337	4.83333	5.68289	5.60394
Helitron-2N1_DVir	0.161545	0.974989	NA	0	0	0	0.0943764	0	0
Helitron-2N_DW	1.99581	-0.474687	NA	1.95497	1.01897	-0.166667	0.954973	1.01897	-0.166667
Helitron-2_DRh	4.89504	0.236129	0.861359	2.04335	3.09438	1.0368	2.62831	1.67934	2.84416
Helitron-2_DVir	14.979	0.208613	0.820768	2.83333	3.95497	4.1889	3.83333	4.1249	3.82633
Helitron-N1_DAn	0	NA	NA	0	0	0	0	0	0
Helitron-N1_DBi	9.75207	0.263244	0.811478	3.0368	3.50278	3.09438	3.73724	2.62831	3.79482
Helitron-N1_DEl	0.508352	0.898529	NA	0	0	0.0368002	0.0433495	0	0.0368002
Helitron-N2_DBi	1.97836	-0.997268	NA	0.833333	1.53994	1.60394	1.4183	-0.0450267	0
Helitron-N2_DEl	112.592	0.121717	0.761024	6.52483	7.14826	6.38792	6.68289	6.99625	6.72815
Helitron-N2_DT	2.16107	-0.697286	NA	1.62176	1.04335	1.67934	2.0368	0	0.0943764
Helitron-N3_DT	0.970108	0.0611325	NA	0.0189735	0.833333	0	0.0189735	-0.166667	-0.0450267
Hoana1	0	NA	NA	0	0	0	0	0	0
Hoana6	0	NA	NA	0	0	0	0	0	0
Hoyak2	1.00166	0.0160666	NA	-0.0450267	0.0189735	-0.166667	-0.0450267	1.01897	0
I-1_DEu	0.337746	1.88325	NA	0	0	0	0	0	1.09438
I-1_DF	0.680469	1.50878	NA	0.0189735	0	0	0	-0.166667	0.954973
I-2_DEl	0	NA	NA	0	0	0	0	0	0
I-2_DEu	1.3382	0.020034	NA	1.62176	0.0433495	0	0.0368002	1.62831	0
I-2_DVi	0	NA	NA	0	0	0	0	0	0
I-3_DEu	0.332518	1.86536	NA	0	0	0	-0.166667	-0.0450267	0
I-6_DY	132.645	-0.0252181	0.932221	6.91015	7.1448	6.97317	7.06215	7.01026	6.81339
IDEFIX_I	1685.6	0.51245	1.23127e-05	10.3743	10.6999	10.4473	11.1141	10.9446	10.9594
IDEFIX_LTR	360.107	0.322888	0.0614765	8.15526	8.39377	8.25259	8.61469	8.54743	8.56201
INVADER1_I	1088.92	-0.0399974	0.84096	9.962	10.3364	9.86124	10.0424	10.033	9.92609
INVADER1_LTR	332.489	-0.278941	0.182106	8.5525	8.85392	8.30383	8.43768	8.23317	8.17653
INVADER2_I	2825.91	-0.276512	0.0190891	11.6138	11.5727	11.4373	11.3605	11.1234	11.2713
INVADER2_LTR	331.609	-0.389432	0.0202372	8.60559	8.8223	8.43768	8.20826	8.3232	8.12426
INVADER3_I	760.011	0.590519	2.55678e-05	8.96004	9.31253	9.29044	9.68664	9.6274	9.97462
INVADER3_LTR	57.9055	0.297914	0.465105	5.67934	5.84416	5.77127	6.09438	5.991	6.06572
INVADER4_I	628.136	-0.0335791	0.865462	9.25418	9.57739	8.93137	9.37072	9.17884	9.07651
INVADER4_LTR	197.779	-0.243088	0.39245	7.91944	7.97409	7.51223	7.7233	7.62078	7.2842
INVADER5_I	118.06	-0.407481	0.144332	7.2951	6.96262	6.76233	6.85186	6.54758	6.36436
INVADER5_LTR	36.5154	1.80802	2.99507e-06	4.29128	4.09438	3.84416	6.02063	6.13877	5.39435
INVADER6_I	697.889	0.028755	0.882099	9.17541	9.63093	9.32275	9.26169	9.34084	9.57164
INVADER6_LTR	114.974	-0.152429	0.710137	6.63354	7.39435	6.86353	6.75259	6.81816	6.88884
ISFUN1	2.14797	0.26665	NA	0.954973	1.60394	-0.166667	-0.0450267	1.60394	1.4183
IVK_DM	673.535	0.434956	0.00134085	9.15314	9.44209	9.08873	9.67885	9.6599	9.61401
I_DM	1659.66	0.0913495	0.691488	10.6282	10.6196	10.539	10.9334	10.6131	10.4498
JOCKEY2	681.002	-0.111289	0.629602	9.5332	9.7668	9.29419	9.32644	9.44089	9.45465
Jockey	2548.46	-0.483259	0.00019497	11.4122	11.4961	11.5263	11.0089	10.8596	11.0817
Jockey-10_DRh	0	NA	NA	0	0	0	0	0	0
Jockey-12_DAn	0	NA	NA	0	0	0	0	0	0
Jockey-1_DBp	0	NA	NA	0	0	0	0	0	0
Jockey-1_DEr	98.8284	-0.0958917	0.811478	6.58251	7.17119	6.42912	6.51908	6.79482	6.57596
Jockey-1_DEu	0.177934	-0.948564	NA	0	0	0.0189735	0	0	0
Jockey-1_DF	8.12363	-0.125185	0.911027	1.67934	2.62176	4.04335	2.4163	3.49623	2.8507
Jockey-1_DK	11.7543	0.0661203	0.935482	3.20673	3.95024	3.55381	3.49623	3.62831	3.79482
Jockey-1_DPer	0	NA	NA	0	0	0	0	0	0
Jockey-1_DSe	182.789	-0.532499	0.527079	8.12795	7.6274	7.08506	6.29276	7.49413	7.42836
Jockey-1_DSi	16.3326	-0.191956	0.832576	4.00127	4.42912	4.13081	4.67934	3.35873	3.62831
Jockey-1_DYa	37.4348	-0.183117	0.761024	5.43567	5.64897	5.0368	5.17263	5.22366	5.16608
Jockey-2_DAn	0.326417	-1.8272	NA	0	0.0368002	0.0433495	0	0	0
Jockey-2_DEl	1.03309	-0.0561468	NA	0	0	1.53994	0.0189735	0	0.954973
Jockey-2_DEu	0	NA	NA	0	0	0	0	0	0
Jockey-2_DRh	0.161545	0.974989	NA	0	0	0	0.0189735	0	0
Jockey-2_DSim	26.7406	-0.773923	0.141188	5.36528	5.48669	4.42912	3.95024	4.48669	4.56036
Jockey-3_DPer	5.51579	0.0834756	0.943073	2.60394	1.83333	2.53994	2.82633	0.833333	2.95497
Jockey-3_DRh	0	NA	NA	0	0	0	0	0	0
Jockey-3_DSim	157.259	0.079316	0.811478	6.9932	7.36436	7.24779	7.27628	7.1448	7.37653
Jockey-4_DAn	0	NA	NA	0	0	0	0	0	0
Jockey-4_DEl	1.16035	-1.28171	NA	1.09438	1.0368	0.0433495	0	1.0368	0
Jockey-4_DEu	0	NA	NA	0	0	0	0	0	0
Jockey-4_DK	0.177934	-0.948564	NA	0	0	-0.0450267	0	0	0
Jockey-4_DSim	0	NA	NA	0	0	0	0	0	0
Jockey-4_DT	0.171751	-0.948564	NA	-0.0450267	0	0	0	0	0
Jockey-5_DYa	41.0927	1.3393	0.000173552	4.2029	4.47841	4.69131	5.83762	5.77386	5.81061
Jockey-6_DK	128.182	-0.0386252	0.898872	6.94366	7.08506	6.86676	7.1448	6.80033	6.77585
Jockey-6_DRh	0	NA	NA	0	0	0	0	0	0
Jockey-6_DYa	0.504351	-2.44523	NA	0	-0.0450267	1.01897	0	0	0
Jockey-9_DY	0.319456	0.0132219	NA	0	0.0943764	0	0	0.0943764	0
LOOPER1_DM	294.285	0.0534157	0.84096	8.14966	8.4205	8.15187	8.3423	8.2989	8.20322
LTRMDG3_DM	314.638	-0.236103	0.266344	8.17897	8.64103	8.23847	8.27239	8.06882	7.97288
Loa-1_DEl	0	NA	NA	0	0	0	0	0	0
M4DM	585.302	-0.552807	7.374e-05	9.12565	9.62917	9.40484	8.84456	8.7132	8.90467
MARINER2_DM	408.185	-0.00839547	0.961723	8.86587	8.78499	8.57473	8.79828	8.63671	8.73335
MARINER_DMA	0	NA	NA	0	0	0	0	0	0
MAX_I	4358.71	-0.673477	1.06799e-11	12.3661	12.6592	12.3403	11.8053	11.7584	11.742
MAX_LTR	168.649	-0.510136	0.0140725	7.43325	7.59883	7.68431	6.95227	7.01026	7.1889
MDG1_I	1856.94	-0.235397	0.0979104	11.0852	11.1329	10.8982	10.8375	10.6662	10.8627
MDG1_LTR	200.782	0.530671	0.00576494	7.2029	7.57356	7.13711	7.93797	7.70547	7.81061
MDG3_DM	2515.5	0.189395	0.238025	11.1499	11.3737	11.2737	11.5589	11.2381	11.5191
MICROPIA_I	732.854	1.30832	5.82504e-17	8.76717	8.71903	8.50572	10.3193	9.86951	9.63797
MICROPIA_LTR	118.521	0.84	0.00125931	6.27217	6.84926	6.28473	7.64326	7.37978	6.77827
MINOS	5.16677	0.498883	0.768312	0	2.62176	2.8507	1.67934	2.62176	3.21327
Mariner-12_DAn	0	NA	NA	0	0	0	0	0	0
Mariner-17_DK	17.6994	0.609812	0.399879	4.00326	3.4144	3.71941	4.4183	3.76233	4.71941
Mariner-1_DSim	30.1076	-0.215747	0.76408	4.87695	4.74022	5.2029	4.41129	4.3569	5.24038
Mariner-4_DY	1.17341	-0.407268	NA	1.0368	0.0433495	0.0943764	0.0368002	1.04335	0
Mariner-5_DBp	0	NA	NA	0	0	0	0	0	0
Mariner-5_DRh	0.170973	0.974989	NA	0	0	0	0	0.0943764	0
Mariner-6_DBi	0.161545	0.974989	NA	0	0	0	-0.0450267	0	0
Mariner-7_DBi	0	NA	NA	0	0	0	0	0	0
Mariner-9_DAn	14.2727	-0.389179	0.675574	4.15526	4.04244	3.60394	3.53377	3.53994	3.60394
Mariner-9_DEl	0	NA	NA	0	0	0	0	0	0
MuDR-1_DEl	0	NA	NA	0	0	0	0	0	0
MuDR-1_DF	0	NA	NA	0	0	0	0	0	0
MuDR-1_DK	3.33558	0.315724	0.850693	2.15526	1.53994	0.0189735	0.833333	2.2769	2.01897
MuDR-1_DT	0.337746	1.88325	NA	0	0	0	0	0	1.04335
NINJA_I	1013.9	-0.328786	0.0176285	10.0398	10.4379	9.77144	9.7926	9.7772	9.66306
NINJA_LTR	133.8	0.629308	0.00669045	6.52865	6.82471	6.96474	7.59139	7.32875	7.25425
NOF_FB	669.14	0.44274	0.00237106	9.21619	9.09308	8.9662	9.61516	9.52682	9.4144
NOMAD_I	2681.3	-0.224091	0.141188	11.5615	11.726	11.4031	11.4982	11.3268	11.1414
NOMAD_LTR	319.478	-0.289751	0.135089	8.23847	8.60961	8.35882	8.1048	8.18379	7.99625
P-1_DY	114.18	-0.0392831	0.898872	6.5748	7.02106	6.80033	6.61469	6.72316	6.90162
POGO	453.178	0.892158	1.54522e-10	8.02316	8.43071	8.30899	9.10713	9.01026	9.27872
POGON1	55.9961	-1.10526	0.00077818	6.64897	6.05917	6.17263	5.13877	5.39435	5.04335
PROTOP	1177.99	0.202974	0.182641	9.95638	10.2834	9.8859	10.2859	10.2113	10.1953
PROTOP_A	1190.5	0.156581	0.36283	10.1674	10.2865	10.1591	10.4108	10.1829	10.4431
PROTOP_B	631.651	0.137024	0.472492	9.25976	9.15301	9.11988	9.47018	9.12795	9.30591
P_DB	8.71001	-0.133406	0.898474	3.21327	3.79482	2.62176	3.21327	2.4163	3.49623
Pifo_I	343.753	-0.358655	0.058128	8.75615	8.79835	8.41839	8.18713	8.40312	8.25767
Pifo_LTR	44.9948	-0.844302	0.0332565	5.97734	6.14826	5.19089	4.34729	5.3409	4.96262
Polinton-1_DY	30.804	-0.778624	0.0848521	5.46961	5.52064	5.0368	4.68721	4.3423	4.62176
Polinton-2_DEu	0.171751	-0.948564	NA	-0.0450267	0	0	0	0	0
QUASIMODO2-I_DM	450.89	-0.109309	0.658427	8.87072	8.96004	8.60602	8.74007	8.58488	8.75263
QUASIMODO2-LTR_DM	167.63	0.0655296	0.84096	7.2528	7.50377	7.49623	7.57473	7.57819	7.25597
QUASIMODO_I	1770.03	0.387674	0.00114085	10.4258	10.6658	10.4917	10.9201	10.8475	10.9371
QUASIMODO_LTR	769.276	0.191872	0.269517	9.50377	9.65151	9.51096	9.90012	9.57983	9.71754
R1-1B_DK	0.161545	0.974989	NA	0	0	0	0.0433495	0	0
R1-1_DBi	0	NA	NA	0	0	0	0	0	0
R1-1_DEr	0.504269	0.90432	NA	-0.166667	0	0	-0.166667	-0.0450267	0
R1-1_DSi	184.615	0.210542	0.45267	7.61008	7.71628	7.09863	7.86256	7.48801	7.6944
R1-1_DYa	10.0212	-0.0751695	0.935482	3.1889	3.29276	3.4144	2.60394	3.74022	2.95497
R1-2_DM	155.784	0.0154008	0.950211	7.21236	7.37653	7.07174	7.17414	7.3853	7.10012
R1-3_DEl	0	NA	NA	0	0	0	0	0	0
R1-3_DEu	0.177934	-0.948564	NA	0	0	0.0189735	0	0	0
R1-3_DK	0	NA	NA	0	0	0	0	0	0
R1-3_DYa	2.52185	0.992623	0.650966	-0.166667	-0.0450267	1.60394	1.83333	1.95497	1.01897
R1-5_DYa	13.9875	-0.256306	0.807163	3.62176	4.13081	4.18184	3.0368	3.21327	4.48669
R1A_DAn	1.49773	-0.987763	NA	0.833333	0.954973	1.01897	-0.166667	-0.0450267	0.0189735
R1_DEr	18.4382	0.202786	0.808256	4.01897	4.15526	3.95497	4.1889	4.15526	4.34729
R1_DM	3984.57	-0.0299305	0.861297	11.9917	12.3099	11.8218	12.1138	11.9858	11.8959
R1_DSe	88.2757	0.167875	0.681977	6.30359	6.71577	6.30383	6.65151	6.4009	6.73823
R1_DSi	217.388	0.196142	0.4482	7.47018	7.81633	7.51722	8.01897	7.65988	7.68968
R1_DYa	40.8059	0.440613	0.325551	5.22366	5.3222	4.99755	5.87574	5.28473	5.62831
R2_DM	3185.18	-0.614041	0.000408698	11.7305	11.9508	12.1902	11.5706	11.3389	11.1275
R2_DPs	0	NA	NA	0	0	0	0	0	0
R2_DSe	55.5268	-0.826392	0.0172228	5.74689	6.06215	6.38124	5.63368	5.08126	4.99937
R2_DSi	29.7886	-0.33571	0.628049	4.36528	5.70909	5.08119	4.79824	5.00127	4.49623
R2_DYa	0.659713	-1.46905	NA	-0.166667	-0.0450267	0.0189735	-0.166667	0	0
REP-1_DTa	0.171751	-0.948564	NA	-0.0450267	0	0	0	0	0
REP-2_DTa	4.12403	0.135927	0.92475	2.04335	2.4163	1.62176	2.36528	0.0943764	2.84416
ROOA_I	4164	0.0628271	0.742571	12.046	12.1388	11.9928	12.1914	12.0326	12.1037
ROOA_LTR	553.851	0.101546	0.675574	9.05037	9.08506	8.87499	9.1299	9.13272	9.02069
ROO_I	17157.4	-0.0867994	0.645666	14.0775	14.239	14.2089	14.1332	13.9901	14.1071
ROO_LTR	1611.64	-0.0859771	0.6588	10.7037	10.6212	10.5988	10.6673	10.3908	10.5697
ROVER_DM	933.573	-0.192251	0.27138	9.86831	10.3553	9.84737	9.94723	9.79308	9.72155
Rehavkus-1_DY	15.605	-0.367925	0.678084	4.09438	4.68066	3.74379	4.09438	3.62176	3.74379
STALKER2_I	2543.42	0.390328	0.0302078	11.245	11.0966	11.151	11.7325	11.1829	11.6854
STALKER2_LTR	352.745	0.79373	4.51205e-05	8.05789	7.65988	8.09963	8.93186	8.32519	8.91498
STALKER3_LTR	52.3477	-0.252342	0.616646	5.92599	6.00127	5.76472	5.74379	5.7668	5.35873
STALKER4_I	13212.8	0.357492	0.139442	12.9695	13.5868	13.7147	14.0342	13.3418	13.8997
STALKER4_LTR	668.099	0.230037	0.32191	9.11118	9.36323	9.48006	9.81889	9.2608	9.5352
S_DM	1281.09	-0.214891	0.141188	10.3462	10.5465	10.2214	10.2404	10.1262	10.0622
TABOR_DA-I	4.82823	-0.283767	0.841119	1.60394	2.4183	2.76233	2.01897	2.15526	1.95497
TABOR_I	3143.65	0.706417	2.35471e-08	10.9088	11.3197	11.2657	11.7644	11.7157	12.0867
TABOR_LTR	179.812	-0.698794	0.000810331	7.94613	8.09208	7.5352	7.02511	7.0368	7.36528
TAHRE	4763.03	2.85407	1.31248e-91	10.1729	10.5425	9.60317	13.1823	12.833	12.8548
TART	3736.63	1.51752	7.12784e-31	11.002	11.0182	10.5428	12.4906	12.0786	12.5179
TART_B1	3822.78	-0.0923089	0.800382	11.8442	12.1085	11.7072	11.5777	11.3109	12.3127
TC1-2_DM	1261.88	-0.0657116	0.748298	10.2135	10.5188	10.1048	10.2679	10.1788	10.1507
TC1_DM	1003.98	-0.178426	0.306647	10.1453	10.217	10.0103	9.85857	9.86353	10.0717
TIRANT_I	7522.37	0.0770258	0.79802	12.6312	12.6855	12.9844	12.9026	12.5187	13.0855
TIRANT_LTR	1220.26	0.273317	0.232192	9.97113	10.2003	10.3199	10.3608	10.2159	10.6852
TOM_I	325.513	0.137772	0.628049	8.40312	8.24302	8.36116	8.5525	8.29601	8.54559
TRANSIB2	1180.04	0.270348	0.0496727	10.125	10.2105	10.056	10.4163	10.3176	10.4271
TRANSIB3	546.036	-0.0789763	0.74578	9.02911	9.29974	8.90211	8.97456	9.16363	8.80775
TRANSPAC_I	1970.45	-0.287804	0.044808	11.1948	11.1636	11.0781	10.9141	10.6962	10.9273
TRANSPAC_LTR	338.155	0.0501804	0.847232	8.49875	8.22565	8.22644	8.32275	8.17763	8.55116
Transib-1_DRh	0.978193	2.22385	NA	0	0.0943764	0	1.04335	0	1.62176
Transib-3_DF	0.806463	-0.507182	NA	0.0433495	1.09438	0	0	0	1.0368
Transib-3_DRh	0	NA	NA	0	0	0	0	0	0
Transib-4_DBi	0	NA	NA	0	0	0	0	0	0
Transib-N1_DM	14.0582	-0.209502	0.825576	3.9208	4.2029	3.3409	3.15526	3.53994	4.10644
Transib1	269.067	0.0723725	0.807163	7.86786	8.14309	7.9208	8.0635	8.05789	7.9932
Transib4	322.373	-0.277265	0.159201	8.3896	8.56972	8.26796	8.1249	8.06337	8.15526
Transib5	368.145	-0.579389	0.000132245	8.7772	8.67882	8.72976	8.23814	8.01324	8.15954
ZAM_I	378.535	0.489331	0.00659669	8.04765	8.65194	7.99052	8.6567	8.81295	8.68786
ZAM_LTR	55.7369	0.976332	0.00197797	5.2643	5.73724	4.79824	6.46942	6.16608	6.15187
hAT-1_DSi	39.6076	0.0119424	0.972297	5.08426	5.63368	5.00326	5.16443	5.44524	5.11874
hAT-2_DSe	36.7592	0.59557	0.180914	4.73724	4.8507	5.18184	5.42912	5.65806	5.45193
hAT-2_DY	81.2564	-0.301741	0.379639	6.62831	6.73823	6.28473	6.31014	6.22366	6.18655
hAT-4_DK	0.168873	0.974989	NA	0	0	0	0	0	0.0189735
hAT-N1B_DBp	0	NA	NA	0	0	0	0	0	0
hAT-N1_DBp	0	NA	NA	0	0	0	0	0	0
