# Supplementary material for: Adaptive evolution of an essential telomere protein restricts telomeric retrotransposons
Source: eLife. 2020 Dec 22;9:e60987. doi: 10.7554/eLife.60987 (PMC7755394; doi:10.7554/eLife.60987)
Supplement: Figure 2—source data 2. [file elife-60987-fig2-data2.xlsx]

## Sheet: Sheet1
Figure 2–Source Data 2. Number of normalized piRNA reads that map to transposon families of D. melanogaster.
TE_consensus	HOAP[mel]_normalized_by_total_miRNA	HOAP[yak]_normalized_by_total_miRNA	HOAP[mel]_rep1_raw_count	HOAP[mel]_rep2_raw_count	HOAP[mel]_rep3_raw_count	HOAP[yak]_rep1_raw_count	HOAP[yak]_rep2_raw_count	HOAP[yak]_rep3_raw_count
ACCORD2_I	11908.4	9778.81	20229	22519	19996	19789	20674	21855
ACCORD2_LTR	1888.82	2177.86	3219	3614	3119	4462	4604	4813
ACCORD_I	14309.3	25007.4	21782	28487	25125	49986	47825	61555
ACCORD_LTR	4692.64	8010.03	7070	9418	8237	16491	16181	18374
BAGGINS1	48824	57522.5	82401	94091	80756	115306	120496	130775
BARI1	77.6255	128.673	107	163	139	274	264	282
BARI_DM	12719.2	16409.5	21672	22962	22382	30550	33730	40294
BATUMI_I	161201	177859	275590	302378	271384	368899	359853	404698
BATUMI_LTR	5098.99	2697.42	8041	9224	9601	5768	5546	5876
BEL-10_DEl-I	1427.06	1336.78	2237	2975	2307	2766	2544	3209
BEL-10_DWil-I	27.3303	28.0883	48	48	48	67	51	61
BEL-11_DBp-I	0.189793	0.156918	0	1	0	0	0	1
BEL-11_DEl-I	14.4243	37.1895	31	25	20	59	87	91
BEL-13_DTa-I	1033.24	1243.42	1806	1918	1720	2484	2446	2994
BEL-14_DP-I	3.60608	29.1867	4	3	12	56	59	71
BEL-19_DAn-I	31.8853	94.7784	59	70	39	195	196	213
BEL-1_DPer-I	36.2505	34.9927	52	63	76	64	68	91
BEL-1_DRh-I	4.36525	6.74747	7	9	7	11	11	21
BEL-21_DTa-I	192.64	175.12	292	356	367	436	330	350
BEL-21_DWil-I	1.13876	0.470754	1	3	2	2	1	0
BEL-2_DAn-I	50.4851	135.734	96	95	75	292	291	282
BEL-2_DSe-I	2299.54	26396.3	3596	4987	3533	52374	53638	62205
BEL-2_DSe-LTR	111.788	3130.35	183	228	178	6167	6611	7171
BEL-2_Deu-I	19.5487	121.768	32	28	43	240	224	312
BEL-3_DEl-I	0.759174	0.470754	2	2	0	0	3	0
BEL-3_DYa-I	95.6559	105.92	156	175	173	241	211	223
BEL-3_DYa-LTR	0	0	0	0	0	0	0	0
BEL-3_Deu-I	2.27752	5.49213	3	3	6	6	19	10
BEL-4_DEl-I	3.98566	4.70754	2	12	7	7	10	13
BEL-4_DFi-I	6.83256	6.74747	7	15	14	19	9	15
BEL-4_DYa-I	30.1772	37.0326	57	43	59	73	79	84
BEL-5_DEu-I	2370.71	2950.21	3986	4579	3926	6051	5923	6827
BEL-5_DFi-I	7.02236	7.37514	13	14	10	11	17	19
BEL-6_DWil-I	29.418	32.0112	51	50	54	79	63	62
BEL-6_DYa-I	16154.5	19010.6	27099	31096	26921	37233	39396	44521
BEL-6_DYa-LTR	1544.73	1762.82	2650	2870	2619	3628	3791	3815
BEL-8_DAn-I	23.914	33.4235	37	47	42	62	75	76
BEL-8_DPe-I	1.89793	4.70754	3	4	3	10	7	13
BEL2-I_Dya	14.2345	17.104	35	17	23	37	26	46
BEL_I	52109.9	68534.4	91246	99406	83909	139728	139914	157111
BEL_LTR	2985.07	3495.66	5283	5741	4704	6872	7612	7793
BLASTOPIA_I	26062.8	27067.7	41766	50040	45516	52939	52176	67381
BLASTOPIA_LTR	1930.2	2688.32	3312	3564	3294	5543	4974	6615
BLOOD_I	74755.1	65540.8	148507	132134	113235	111348	153670	152658
BLOOD_LTR	2053.75	1800.79	4335	3301	3185	3336	4150	3990
BS	45500.5	61688.7	77869	82961	78907	127376	127251	138500
BS2	87414.5	130351	148433	164754	147390	267803	266911	295981
BS3_DM	8989.38	11996.1	14936	17195	15233	23457	25386	27605
BS4_DM	9.48967	14.9072	14	22	14	32	31	32
BURDOCK_I	13613.9	10398	23780	25587	22363	21294	21581	23389
BURDOCK_LTR	1850.11	2180.53	3448	3381	2919	4227	4756	4913
Bica_I	12935.9	15870.2	22514	24721	20923	30896	33264	36977
Bica_LTR	305.947	438.899	530	583	499	840	958	999
CIRCE	52115.8	73461.6	86028	94870	93694	156450	149324	162379
COPIA2I_DM	13223.3	15226.4	26016	24530	19126	27899	33297	35838
COPIA2LTR_DM	820.097	962.848	1514	1452	1355	1834	2065	2237
COPIA_DM_I	14840.9	25584.2	25093	27388	25714	52048	51392	59602
COPIA_DM_LTR	452.088	520.026	703	881	798	1100	1075	1139
CR1-1_DEu	18.9793	31.8543	32	38	30	67	61	75
CR1-1_DF	115.015	117.688	202	239	165	237	248	265
CR1-2_DAn	33.7832	36.248	62	54	62	69	73	89
CR1-2_DEu	367.061	211.839	606	753	575	408	497	445
CR1-2_DF	682.497	793.063	1115	1377	1104	1625	1708	1721
CR1-2_DK	92.2396	145.62	140	175	171	278	303	347
CR1-2_DRh	744.56	851.75	1241	1377	1305	1679	1793	1956
CR1-3_DAn	3.22649	7.68898	5	10	2	13	17	19
CR1-5_DEl	26.0017	19.4578	48	50	39	30	42	52
Chimpo_I	27117.9	36372	46777	50719	45385	70718	74666	86406
Chimpo_LTR	1543.4	2385.78	2740	2831	2561	4773	4939	5492
Chouto_I	18283.8	15179.6	31819	34306	30210	30209	32216	34311
Chouto_LTR	2234.82	2233.57	3810	4244	3721	4486	4849	4899
Copia-1_DBi-I	265.901	342.552	472	457	472	804	621	758
Copia-1_DFi-I	33.5934	43.4663	64	48	65	98	69	110
Copia-1_DGri-I	7.97132	9.25816	18	12	12	26	17	16
Copia-1_DPer-I	9.67947	36.5619	7	25	19	52	68	113
Copia-1_DSe-I	12945.2	20345.8	22214	22046	23947	43573	41084	45002
Copia-1_DSe-LTR	819.148	1060.29	1331	1475	1510	2219	2160	2378
Copia-1_DSim-I	4052.28	6233.09	7012	7729	6610	12512	13088	14122
Copia-1_DSim-LTR	394.201	576.987	659	705	713	1156	1287	1234
Copia-1_DYa-I	6467.97	9039.88	10751	11297	12031	19337	18791	19481
Copia-1_DYa-LTR	12.5264	15.0641	17	27	22	32	33	31
Copia-2_DAn-I	6.64277	10.1997	14	7	14	23	16	26
Copia-2_DBp-I	12.7162	18.2025	25	20	22	49	33	34
Copia-2_DTa-I	11.008	17.261	24	10	24	44	32	34
Copia-2_DYa-I	220.92	581.695	376	409	379	1158	1055	1494
Copia-2_DYa-LTR	0.56938	0.941507	2	1	0	2	0	4
Copia-3_DAn-I	293.99	426.503	518	522	509	856	830	1032
Copia-3_DBp-I	16233.8	18663.7	31015	27008	27511	36876	40006	42057
Copia-3_DEu-I	14.0447	46.4477	25	25	24	93	89	114
Copia-4_DMoj-I	212.948	380.84	367	367	388	787	761	879
Copia-5_DAn-I	30.9363	62.1395	45	59	59	142	108	146
Copia-6_DAn-I	0.379587	0.784589	1	1	0	1	4	0
Copia1-I_DM	11165	13669.7	18856	21086	18885	27860	28139	31115
Copia1-LTR_DM	2014.66	2113.53	3324	3516	3775	4489	4200	4780
DEC1_DS	2.08773	2.6676	4	4	3	4	2	11
DIVER2_I	9920.69	13633	17133	18870	16268	25963	28109	32808
DIVER2_LTR	2925.48	3287.74	4839	5512	5063	6668	6942	7342
DIVER_I	33262.6	43012.6	58238	62667	54352	84994	88904	100211
DIVER_LTR	633.341	812.835	1067	1209	1061	1560	1668	1952
DM1731_I	24928.2	29731.2	41251	46513	43580	59621	60110	69739
DM1731_LTR	2169.72	2432.85	3254	4141	4037	4982	4907	5615
DM176	19736.1	30975	33301	37879	32807	62933	64087	70376
DM297_I	28771.9	27314.7	47447	53069	51080	56397	56801	60872
DM297_LTR	20711.8	14987.1	31442	39231	38455	40441	28655	26413
DM412B_LTR	3188.53	3074.96	5803	6305	4692	5638	6960	6998
DM412_I	78168.9	73555.7	142423	149441	119999	132005	167357	169391
DM412_LTR	3872.55	4174.33	5863	7920	6621	8465	8868	9269
DMCR1A	79607.7	88708.7	135505	147360	136579	178760	188445	198114
DMLTR5	1289.08	1141.73	2283	2348	2161	2271	2324	2681
DMRT1A	117460	118395	203434	219331	196117	241540	243754	269206
DMRT1B	217929	258523	372244	408842	367155	527014	529325	591163
DMRT1C	3118.88	6558.38	5433	5400	5600	13003	13933	14859
DMTOM1_LTR	62.6318	53.8228	99	110	121	108	103	132
DNA4-1_DK	5.50401	5.96288	9	10	10	14	10	14
DOC	118420	124393	203549	220653	199739	252326	260704	279698
DOC2_DM	18790.1	23701.5	32795	36280	29928	45687	49109	56248
DOC3_DM	38818.3	45893.3	66612	72589	65328	91010	98109	103348
DOC4_DM	844.201	1780.86	1428	1537	1483	3425	3672	4252
DOC5_DM	4172.42	5732.05	7155	8097	6732	11277	12498	12754
DOC6_DM	5679.76	7816.24	9715	10691	9520	15477	16532	17802
FB4_DM	962.063	2558.7	1691	1622	1756	5134	5369	5803
FROGGER_I	208.393	258.915	366	373	359	528	509	613
FROGGER_LTR	13.4753	17.261	25	26	20	30	39	41
FW	109515	116040	186237	208031	182756	240363	236935	262198
FW2_DM	732.223	995.801	1319	1323	1216	1978	2233	2135
FW3_DM	525.538	698.912	867	983	919	1455	1387	1612
G2_DM	31889.1	34429.7	55315	59475	53230	68978	69041	81393
G3_DM	584.564	812.207	991	1117	972	1707	1683	1786
G4_DM	6395.47	8726.05	10900	11575	11222	17781	18007	19821
G5A_DM	3176.76	3133.96	5545	5820	5373	6150	6762	7060
G5_DM	10319.8	15148.1	16989	19259	18126	29661	32214	34660
G6_DM	21046.6	31599.2	40132	38418	32342	58612	67316	75446
G7_DM	145.951	109.686	246	284	239	249	203	247
GTWIN_I	50784.9	55644.5	72151	105918	89511	115891	106575	132143
GTWIN_LTR	6356.18	6765.36	9296	13310	10884	13946	13616	15552
GYPSY10_I	26462.5	28795.2	49292	50329	39807	50854	65470	67181
GYPSY10_LTR	2141.82	2296.65	3904	4209	3172	4103	4995	5538
GYPSY11_I	60.3543	82.0681	108	107	103	177	150	196
GYPSY11_LTR	57.5074	57.7458	102	118	83	101	120	147
GYPSY12A_LTR	826.171	1252.99	1322	1470	1561	2409	2502	3074
GYPSY12_I	44674.5	74239.7	76429	78373	80583	153328	150412	169372
GYPSY12_LTR	32360.9	40048.6	55284	56776	58446	84080	81676	89464
GYPSY2_I	36780.8	39147.2	67163	70489	56142	73172	84281	92023
GYPSY2_LTR	1372.59	1774.58	2133	2750	2349	3622	3642	4045
GYPSY3_I	20097.2	16943.4	39096	37235	29559	28450	39320	40206
GYPSY3_LTR	3537.56	3978.03	6476	6778	5385	7300	8950	9101
GYPSY4_I	49561.7	57502.1	87503	95435	78197	108245	126779	131423
GYPSY4_LTR	1998.34	2344.04	3626	3918	2985	4341	5084	5513
GYPSY5_I	8180.48	8079.86	11750	17360	13992	17198	16300	17993
GYPSY5_LTR	1212.4	1219.41	2011	2447	1930	2250	2476	3045
GYPSY6A_LTR	4419.72	4446.27	7665	8668	6954	8693	9578	10064
GYPSY6_I	45716.3	58604.4	85916	87095	67863	110188	125380	137904
GYPSY6_LTR	2115.06	2561.21	3918	3900	3326	5038	5527	5757
GYPSY7_I	1622.16	2203.91	2683	3082	2782	4471	4719	4855
GYPSY7_LTR	52.383	59.315	103	103	70	106	116	156
GYPSY8_I	15996	14605.3	28042	30405	25834	29514	30420	33142
GYPSY8_LTR	1919.57	2101.13	3529	3378	3207	4052	4418	4920
GYPSY9_I	387.558	812.05	604	760	678	1612	1667	1896
GYPSY9_LTR	37.9587	46.1339	76	72	52	111	83	100
GYPSY_DS	124.694	155.976	193	257	207	330	313	351
GYPSY_I	52969.3	60451.4	81077	107610	90402	121626	122698	140918
GYPSY_LTR	5333.39	5928.51	7252	10772	10077	12600	12074	13107
G_DM	68953.3	98369.3	112853	136612	113842	210159	196176	220549
Galileo_DM	0.189793	0	1	0	0	0	0	0
Gypsy-10_DBp-I	81.9908	88.6586	153	116	163	178	221	166
Gypsy-10_DSim-I	1499.75	1614.69	2562	2989	2351	3077	3424	3789
Gypsy-11_DRh-I	29.418	19.144	51	70	34	39	46	37
Gypsy-11_DSim-I	13982.7	16827.7	22463	28096	23114	33934	34259	39046
Gypsy-11_DSim-LTR	497.828	633.164	771	1017	835	1303	1242	1490
Gypsy-11_DTa-I	212.379	217.331	333	446	340	443	519	423
Gypsy-12_DEu-I	43.8423	39.5433	61	103	67	87	87	78
Gypsy-12_DSim-I	4871.81	5173.58	7998	9668	8003	10145	11230	11595
Gypsy-12_DSim-LTR	710.207	751.95	1258	1341	1143	1391	1573	1828
Gypsy-12_DTa-I	645.487	617.786	1133	1252	1016	1297	1272	1368
Gypsy-12_DVir-I	88.6335	73.7514	143	174	150	156	153	161
Gypsy-13_DAn-I	810.038	625.161	1402	1584	1282	1178	1379	1427
Gypsy-13_DBp-I	11.1978	9.57199	17	22	20	18	16	27
Gypsy-13_DSim-I	38763.6	36797.2	67837	72749	63655	71966	77792	84742
Gypsy-13_DSim-LTR	1867.19	2772.58	3206	3395	3237	5433	5813	6423
Gypsy-14_DAn-I	3674.21	3099.76	4812	7181	7366	8923	5674	5157
Gypsy-14_DEu-I	0.379587	0	0	1	1	0	0	0
Gypsy-15_DBi-I	41.5648	36.7188	82	88	49	73	72	89
Gypsy-15_DEl-LTR	0.189793	0.470754	0	1	0	0	2	1
Gypsy-15_DFi-LTR	13.2855	16.3195	24	27	19	23	44	37
Gypsy-15_DWil-I	148.988	162.724	267	279	239	280	369	388
Gypsy-16_DEl-I	207.824	246.989	360	397	338	475	518	581
Gypsy-17_DBi-I	125.264	62.1395	205	283	172	133	124	139
Gypsy-18_DBp-I	1066.64	1082.11	1653	2014	1953	2274	2271	2351
Gypsy-18_DEl-I	280.704	327.017	542	484	453	603	653	828
Gypsy-18_DTa-LTR	5.12442	12.0827	12	11	4	25	23	29
Gypsy-1_DAn-I	6.64277	16.6333	5	14	16	32	43	31
Gypsy-1_DBi-I	610.565	558	951	1189	1077	1139	1200	1217
Gypsy-1_DGri-I	37.0097	48.1738	64	57	74	95	108	104
Gypsy-1_DSe-I	587.031	606.331	972	1123	998	1148	1326	1390
Gypsy-1_DSe-LTR	0.948967	1.56918	1	0	4	6	1	3
Gypsy-1_DSim-I	17558.6	17621.1	29480	34569	28465	34034	37929	40332
Gypsy-1_DSim-LTR	677.942	623.278	1113	1408	1051	1176	1351	1445
Gypsy-1_DTa-I	31.6955	29.9713	70	54	43	63	63	65
Gypsy-1_DVir-I	4434.71	6089.83	7531	8357	7478	12538	12820	13451
Gypsy-20_DBp-I	1171.59	950.452	1941	2325	1907	1849	1984	2224
Gypsy-20_DEl-I	284.121	283.864	519	536	442	558	586	665
Gypsy-21_DAn-I	8.92029	11.2981	9	23	15	21	12	39
Gypsy-22_DAn-I	5.8836	44.5647	13	12	6	83	89	112
Gypsy-22_DBp-I	42.8933	85.3633	67	90	69	175	179	190
Gypsy-22_DEl-I	36.8199	34.2081	72	55	67	70	75	73
Gypsy-22_DEl-LTR	2.8469	2.51069	6	3	6	2	7	7
Gypsy-22_DY-I	1.89793	3.76603	5	4	1	12	5	7
Gypsy-22_DYa-I	564.066	787.885	956	1084	932	1597	1610	1814
Gypsy-23_DYa-I	134.943	110.941	216	277	218	239	253	215
Gypsy-24_DAn-I	37.9587	75.9483	65	65	70	144	183	157
Gypsy-24_DEl-I	775.116	757.913	1607	1401	1076	1203	1781	1846
Gypsy-24_DY-I	125.264	152.995	200	261	199	293	324	358
Gypsy-24_DYa-I	3320.25	3718.95	5699	6601	5194	7180	7989	8531
Gypsy-24_DYa-LTR	16.8916	43.6232	26	31	32	85	100	93
Gypsy-25_DEl-I	13.8549	12.3965	24	27	22	20	28	31
Gypsy-25_DYa-I	8.5407	8.31665	13	10	22	19	17	17
Gypsy-26_DBp-I	11.3876	10.8273	11	20	29	19	22	28
Gypsy-26_DPse-I	347.512	377.544	665	642	524	704	809	893
Gypsy-26_DPse-LTR	28.469	35.9342	63	43	44	58	83	88
Gypsy-26_DYa-I	2670.77	3109.01	4512	5067	4493	6396	6517	6900
Gypsy-26_DYa-LTR	583.994	1436.11	1012	1155	910	2741	2927	3484
Gypsy-27_DYa-I	131.717	214.507	205	255	234	367	432	568
Gypsy-27_DYa-LTR	18.9793	16.0056	28	35	37	24	44	34
Gypsy-28_DAn-I	1260.8	1348.71	2120	2254	2269	2677	2915	3003
Gypsy-28_DBp-I	109.321	111.255	197	203	176	203	248	258
Gypsy-28_DYa-I	7.97132	15.8487	16	12	14	29	34	38
Gypsy-29_DAn-I	61.4931	79.8712	107	116	101	145	166	198
Gypsy-29_DYa-I	24.2936	22.1254	34	34	60	50	38	53
Gypsy-2_DBp-I	53.7115	43.7801	93	111	79	80	106	93
Gypsy-2_DRh-I	9.67947	20.5562	19	16	16	55	43	33
Gypsy-2_DSe-I	11467.7	12851.4	18949	22908	18565	26574	26934	28391
Gypsy-2_DSe-LTR	41.375	78.7728	70	70	78	160	168	174
Gypsy-2_DSim-I	874.758	1902.47	1383	1572	1654	3647	3926	4551
Gypsy-2_DSim-LTR	1656.9	1315.76	2711	3221	2798	2551	2700	3134
Gypsy-30_DWil-I	2508.69	2657.4	4193	4436	4589	5622	5577	5736
Gypsy-30_DWil-LTR	11.1978	8.00281	16	24	19	28	10	13
Gypsy-31_DEl-I	119.57	153.936	205	232	193	314	340	327
Gypsy-31_DYa-I	537.115	545.29	869	1098	863	1067	1059	1349
Gypsy-32_DEl-I	36.8199	43.937	56	77	61	90	97	93
Gypsy-33_DEl-I	282.223	200.698	506	539	442	443	407	429
Gypsy-34_DEl-I	68.3256	171.668	125	122	113	356	343	395
Gypsy-37_DEl-I	151.076	193.323	256	280	260	372	438	422
Gypsy-38_DAn-I	294.749	463.379	501	531	521	897	1021	1035
Gypsy-39_DAn-I	120.519	171.511	218	222	195	317	385	391
Gypsy-3_DKi-I	4485.01	5918	7959	7648	8024	12668	11989	13057
Gypsy-3_DSe-I	9.11009	10.5135	10	20	18	17	24	26
Gypsy-3_DSe-LTR	0	0	0	0	0	0	0	0
Gypsy-3_DSim-I	8.16112	5.17829	12	17	14	12	9	12
Gypsy-3_DSim-LTR	0	0	0	0	0	0	0	0
Gypsy-40_DAn-I	303.29	307.559	558	548	492	547	703	710
Gypsy-44_DWil-I	21.8262	30.4421	50	33	32	57	77	60
Gypsy-47_DEl-I	1481.72	1339.29	2918	2739	2150	2531	2905	3099
Gypsy-4_DBi-I	1606.98	1688.75	2721	3010	2736	3402	3585	3775
Gypsy-4_DBi-LTR	179.355	164.607	286	353	306	337	362	350
Gypsy-4_DRh-I	100.401	98.8583	163	189	177	192	222	216
Gypsy-4_DSe-I	5945.09	6170.32	10046	10528	10750	12651	12389	14282
Gypsy-4_DSe-LTR	2243.74	2674.67	3847	3917	4058	5742	5714	5589
Gypsy-4_DSim-I	5638.19	6456.07	9228	11073	9406	12852	13781	14510
Gypsy-4_DSim-LTR	1825.81	2312.18	2898	3572	3150	4897	4469	5369
Gypsy-50_DWil-I	396.289	439.213	810	729	549	728	1040	1031
Gypsy-53_DWil-I	8.7305	13.0242	14	13	19	27	29	27
Gypsy-57_DWil-I	841.165	1206.54	1436	1573	1423	2534	2557	2598
Gypsy-57_DWil-LTR	33.7832	73.1237	58	62	58	156	135	175
Gypsy-5_DAn-I	803.016	802.321	1612	1520	1099	1415	1754	1944
Gypsy-5_DEl-I	92.2396	76.2621	147	171	168	134	141	211
Gypsy-5_DEl-LTR	0.189793	0.784589	0	0	1	1	0	4
Gypsy-5_DEr-LTR	4.36525	2.03993	6	7	10	3	4	6
Gypsy-5_DKi-I	155.82	167.588	268	277	276	322	336	410
Gypsy-5_DSe-I	797.892	618.57	1393	1466	1345	1309	1233	1400
Gypsy-5_DSe-LTR	37.0097	36.8757	63	64	68	82	77	76
Gypsy-5_DSim-I	614.741	633.948	993	1248	998	1342	1285	1413
Gypsy-5_DSim-LTR	3.60608	9.72891	6	7	6	27	17	18
Gypsy-5_DWil-I	1326.28	1482.72	2956	2263	1769	2578	3506	3365
Gypsy-62_DWil-I	650.232	676.473	1382	1159	885	939	1669	1703
Gypsy-6_DEl-I	89.3927	122.867	160	130	181	225	265	293
Gypsy-6_DEl-LTR	121.278	786.629	227	213	199	1532	1595	1886
Gypsy-6_DEu-I	163.602	197.873	261	325	276	334	457	470
Gypsy-6_DRh-I	18.7896	13.0242	21	37	41	25	25	33
Gypsy-6_DSe-I	10198	13081.8	17352	18398	17982	27113	27276	28978
Gypsy-6_DSe-LTR	299.304	304.264	551	559	467	630	630	679
Gypsy-6_DSim-I	6147.22	5958.96	9858	12193	10338	12033	12657	13285
Gypsy-6_DSim-LTR	57.1278	81.1265	97	101	103	140	180	197
Gypsy-6_DVir-I	0.379587	0.941507	1	0	1	2	3	1
Gypsy-7_DBi-I	63.0114	64.4932	118	110	104	119	136	156
Gypsy-7_DEl-I	49.7259	42.9955	74	94	94	89	86	99
Gypsy-7_DEu-I	33.973	33.4235	57	66	56	76	74	63
Gypsy-7_DEu-LTR	4.36525	2.6676	6	8	9	6	3	8
Gypsy-7_DFi-I	34.7322	28.5591	53	78	52	60	56	66
Gypsy-7_DSe-I	1198.17	1101.09	2014	2289	2010	2265	2383	2369
Gypsy-7_DSe-LTR	658.963	897.413	1164	1158	1150	1875	1807	2037
Gypsy-7_DSim-I	6397.37	5426.06	11723	12236	9748	9813	12034	12732
Gypsy-7_DSim-LTR	333.087	410.183	578	657	520	815	874	925
Gypsy-7_DTa-I	1.32855	1.7261	5	0	2	4	2	5
Gypsy-7_DVir-I	809.279	783.648	1422	1579	1263	1520	1729	1745
Gypsy-8_DSe-I	5.6938	5.96288	8	12	10	17	10	11
Gypsy-8_DSe-LTR	0	0	0	0	0	0	0	0
Gypsy-8_DSim-I	1954.3	1981.25	3387	3630	3280	3902	4347	4377
Gypsy-9_DBp-I	75.9174	75.9483	133	162	105	140	153	191
Gypsy-9_DRh-I	22.965	36.4049	52	35	34	73	71	88
Gypsy-9_DSim-I	8866.39	8859.74	15297	14870	16549	18857	18431	19173
Gypsy-9_DSim-LTR	1985.62	2143.18	3316	3504	3642	4045	4657	4956
Gypsy1-I_DM	32637.4	35002.7	60843	63660	47460	62634	78238	82192
Gypsy1-LTR_DM	551.16	716.644	1053	1015	836	1368	1560	1639
Gypsy10-I_Dpse	284.121	288.886	529	515	453	571	585	685
Gypsy10-I_Dya	13.2855	14.1226	18	21	31	25	30	35
Gypsy11-I_Dya	122.796	150.641	192	230	225	317	299	344
Gypsy11-LTR_Dya	3.98566	4.3937	6	10	5	16	6	6
Gypsy12-I_Dya	51.2442	61.9826	86	102	82	101	130	164
Gypsy13-I_Dya	11.008	14.7503	22	20	16	39	24	31
Gypsy13-LTR_Dya	0.56938	0.627672	3	0	0	2	1	1
Gypsy15-I_Dya	16.1324	14.9072	35	26	24	34	36	25
Gypsy16-I_Dya	51.2442	59.315	96	97	77	104	103	171
Gypsy16-LTR_Dya	14.2345	15.0641	23	19	33	34	37	25
Gypsy18-I_Dya	29.418	41.1125	52	66	37	60	101	101
Gypsy2-I_DM	34758.6	39649.9	72376	63733	47030	65493	92704	94482
Gypsy2-LTR_DM	5240.96	5922.24	9468	9905	8241	11087	12841	13813
Gypsy20-I_Dya	6775.63	6551.16	10616	13795	11289	12882	14225	14642
Gypsy20-LTR_Dya	38.5281	28.2452	67	87	49	33	64	83
Gypsy3-I_Dya	0.759174	0.941507	1	3	0	1	1	4
Gypsy4-I_Dya	65.2889	156.447	95	154	95	342	294	361
Gypsy4-LTR_Dya	6.07339	5.17829	6	14	12	13	9	11
Gypsy5-I_Dya	3.22649	3.13836	4	8	5	6	2	12
Gypsy5-LTR_Dya	1.51835	1.09843	2	5	1	1	4	2
Gypsy6-I_Dya	0.759174	2.19685	3	0	1	8	4	2
Gypsy7-I_Dpse	230.219	452.551	353	378	482	943	883	1058
Gypsy7-I_Dya	67.7563	50.8414	118	124	115	105	96	123
Gypsy7-LTR_Dya	24.4834	10.9843	36	45	48	22	22	26
Gypsy8-I_Dya	7.59174	13.1811	8	22	10	34	22	28
Gypsy8-LTR_Dya	0.759174	1.41226	2	0	2	3	2	4
Gypsy9-I_Dya	831.865	828.056	1331	1715	1337	1588	1739	1950
Gypsy_6B	34053.3	41229.1	55201	66458	57764	83459	85316	93968
HELENA_RT	3352.32	4155.97	5770	6429	5464	8286	9023	9176
HELITRON1_DM	3.22649	3.76603	6	3	8	8	5	11
HETA	119703	91695.1	212550	227896	190256	178841	222862	182648
HMSBEAGLE_I	28625.6	22965.2	50961	53613	46251	46980	47958	51414
HOBO	13009.8	12349.6	21840	24138	22569	25839	24982	27880
Harbinger-1_DRh	0.189793	0	0	0	1	0	0	0
Harbinger1_DYa	17.6508	19.144	31	33	29	34	46	42
Helena_Ds	2395	3390.21	3880	4670	4069	6934	7339	7332
Helitron-1N1_DVir	51.434	35.3065	96	84	91	64	76	85
Helitron-1N_DF	2.65711	1.25534	7	5	2	5	2	1
Helitron-1_DEu	257.739	237.26	448	442	468	514	520	478
Helitron-1_DF	5.31422	8.63048	8	8	12	17	13	25
Helitron-1_DPe	0.948967	2.03993	2	1	2	3	5	5
Helitron-1_DT	124.884	112.981	225	217	216	238	229	253
Helitron-1_DVir	51.0544	35.3065	97	80	92	75	73	77
Helitron-1_DYak	23.914	88.0309	47	45	34	160	198	203
Helitron-2N1_DVir	19.1691	18.5163	40	33	28	39	40	39
Helitron-2N_DW	26.7609	17.104	43	46	52	34	42	33
Helitron-2_DRh	43.2729	51.9398	70	81	77	110	109	112
Helitron-2_DVir	2.8469	3.29528	2	7	6	10	7	4
Helitron-N1_DAn	20.3079	22.4393	40	33	34	48	45	50
Helitron-N1_DBi	264.762	219.214	479	443	473	461	501	435
Helitron-N1_DEl	56.7482	40.0141	122	67	110	78	90	87
Helitron-N2_DBi	18.5998	20.8701	42	27	29	38	38	57
Helitron-N2_DEl	356.622	331.881	662	621	596	697	709	709
Helitron-N2_DT	53.5218	40.4848	101	93	88	87	85	86
Helitron-N3_DT	68.3256	51.9398	133	111	116	100	110	121
Hoana1	2.08773	2.35377	3	5	3	6	5	4
Hoana6	0	0.156918	0	0	0	0	1	0
Hoyak2	15.9426	19.7717	40	20	24	42	42	42
I-1_DEu	4.55504	29.3436	3	11	10	52	67	68
I-1_DF	9.86926	12.8673	21	18	13	25	31	26
I-2_DEl	0.189793	1.25534	1	0	0	0	5	3
I-2_DEu	313.349	410.183	506	667	478	824	890	900
I-2_DVi	3.22649	9.10124	8	5	4	23	21	14
I-3_DEu	178.216	255.148	301	361	277	589	565	472
I-6_DY	4335.45	7930.16	7777	7813	7253	16037	16853	17647
IDEFIX_I	22215.3	24676.4	38721	43906	34423	47328	53639	56290
IDEFIX_LTR	2974.82	4623.43	4862	5969	4843	8692	9860	10912
INVADER1_I	9993	20144.5	18802	18399	15451	39029	43563	45784
INVADER1_LTR	3498.27	5561.95	6106	6631	5695	11539	11328	12578
INVADER2_I	12458.8	16248.8	21334	24404	19906	32434	34255	36861
INVADER2_LTR	2630.35	2420.46	4621	4845	4393	4757	5076	5592
INVADER3_I	9893.93	13717.9	16749	19013	16368	27801	28180	31440
INVADER3_LTR	826.361	686.516	1354	1545	1455	1354	1552	1469
INVADER4_I	5160.86	6821.69	8895	9882	8415	13878	14501	15094
INVADER4_LTR	6934.86	8343.64	13925	12020	10594	16315	19180	17677
INVADER5_I	52.5728	54.1367	112	95	70	110	115	120
INVADER5_LTR	26.7609	21.9685	52	51	38	45	38	57
INVADER6_I	26129.1	36846.2	43698	45279	48694	78135	76793	79884
INVADER6_LTR	8572.97	12006.4	15072	14543	15555	25943	24512	26059
ISFUN1	12.1468	8.94432	18	23	23	16	21	20
IVK_DM	16030.7	46567.9	27135	32121	25208	93372	96704	106690
I_DM	20978.2	36189.7	36243	40643	33646	73618	79485	77525
JOCKEY2	3901.39	5535.44	5861	8022	6673	11387	11221	12668
Jockey	70134.6	81431.9	122705	133829	112997	163113	173238	182595
Jockey-10_DRh	13.8549	9.41507	27	24	22	17	24	19
Jockey-12_DAn	0.948967	0.784589	5	0	0	1	2	2
Jockey-1_DBp	1.70814	0	6	3	0	0	0	0
Jockey-1_DEr	456.453	730.139	759	841	805	1481	1510	1662
Jockey-1_DEu	6.07339	10.0427	10	10	12	22	23	19
Jockey-1_DF	27.8996	28.716	50	50	47	55	55	73
Jockey-1_DK	8.5407	6.43363	14	15	16	14	10	17
Jockey-1_DPer	3.41628	0.156918	7	8	3	0	0	1
Jockey-1_DSe	8361.73	9123.83	19374	12898	11785	13594	20730	23820
Jockey-1_DSi	247.87	507.316	447	479	380	1077	1011	1145
Jockey-1_DYa	58.4564	57.9027	95	100	113	116	145	108
Jockey-2_DAn	86.1662	107.96	129	178	147	210	211	267
Jockey-2_DEl	51.2442	65.5917	71	104	95	137	132	149
Jockey-2_DEu	7.59174	11.2981	15	10	15	24	22	26
Jockey-2_DRh	36.0608	63.5517	78	64	48	125	139	141
Jockey-2_DSim	298.355	490.839	600	565	407	806	1122	1200
Jockey-3_DPer	1.70814	1.25534	2	2	5	3	1	4
Jockey-3_DRh	65.2889	70.613	106	125	113	162	125	163
Jockey-3_DSim	23232.4	30434.4	39552	43150	39707	62191	62593	69167
Jockey-4_DAn	5.50401	3.60911	6	13	10	6	10	7
Jockey-4_DEl	69.4644	64.4932	133	127	106	124	127	160
Jockey-4_DEu	7.21215	42.3678	14	12	12	77	97	96
Jockey-4_DK	201.75	184.692	294	418	351	358	375	444
Jockey-4_DSim	0	0.313836	0	0	0	1	1	0
Jockey-4_DT	2.65711	3.76603	5	7	2	8	8	8
Jockey-5_DYa	33.973	40.6417	59	59	61	87	81	91
Jockey-6_DK	16.1324	11.9258	25	28	32	31	23	22
Jockey-6_DRh	0.759174	0.627672	1	1	2	3	0	1
Jockey-6_DYa	95.4661	82.225	186	166	151	165	172	187
Jockey-9_DY	0.379587	1.7261	0	1	1	5	2	4
LOOPER1_DM	1567.31	2650.34	2617	2689	2952	5513	5539	5838
LTRMDG3_DM	3467.53	3892.19	5534	6308	6428	7991	8038	8775
Loa-1_DEl	4.17546	7.37514	7	12	3	16	13	18
M4DM	2669.44	2596.52	4478	5010	4577	5246	5197	6104
MARINER2_DM	133.425	196.775	265	247	191	372	419	463
MARINER_DMA	0	0	0	0	0	0	0	0
MAX_I	285174	251741	497061	537566	467920	508038	512929	583317
MAX_LTR	2224.95	2238.9	3983	4091	3649	4455	4851	4962
MDG1_I	34231.5	37195.5	48545	67826	63991	82016	72777	82245
MDG1_LTR	2818.43	5307.75	4473	5590	4787	11082	10923	11820
MDG3_DM	18749.3	19012.5	32023	35857	30908	38371	39174	43617
MICROPIA_I	19428	25660.8	32952	37971	31441	52978	52539	58013
MICROPIA_LTR	805.673	1121.02	1475	1533	1237	2328	2215	2601
MINOS	1.70814	1.7261	2	2	5	1	5	5
Mariner-12_DAn	0	0	0	0	0	0	0	0
Mariner-17_DK	7.40194	12.0827	12	12	15	26	26	25
Mariner-1_DSim	69.844	104.978	114	124	130	220	270	179
Mariner-4_DY	9.48967	7.53206	18	11	21	14	13	21
Mariner-5_DBp	0.189793	0.156918	0	0	1	0	0	1
Mariner-5_DRh	0.189793	1.25534	0	0	1	2	2	4
Mariner-6_DBi	77.6255	323.722	117	156	136	645	724	694
Mariner-7_DBi	53.332	106.861	93	109	79	195	231	255
Mariner-9_DAn	3.0367	3.45219	1	12	3	8	9	5
Mariner-9_DEl	0.948967	1.88301	2	1	2	1	6	5
MuDR-1_DEl	8.16112	7.21822	12	18	13	17	17	12
MuDR-1_DF	26.1915	103.095	37	53	48	188	235	234
MuDR-1_DK	7.97132	61.6687	10	18	14	106	129	158
MuDR-1_DT	223.577	262.994	440	354	384	565	612	499
NINJA_I	54244.1	59274	91675	103571	90560	118016	119943	139780
NINJA_LTR	1208.79	1324.7	2101	2178	2090	2634	2646	3162
NOF_FB	5829.7	9051.65	10166	9880	10670	18405	19025	20254
NOMAD_I	67891.4	67004.2	115500	127644	114568	133586	140323	153093
NOMAD_LTR	12105.2	12619.6	20799	22398	20584	24915	26717	28790
P-1_DY	4146.61	5966.8	6991	7475	7382	12185	11753	14087
POGO	5339.08	10422.2	9491	9627	9013	20570	21185	24663
POGON1	455.125	614.961	678	939	781	1291	1231	1397
PROTOP	40422	52811.5	67279	74006	71694	109398	109254	117903
PROTOP_A	23891	27250.4	40389	43585	41905	55787	55529	62344
PROTOP_B	12872.4	13890.4	20395	24064	23364	28335	28567	31618
P_DB	0	2.19685	0	0	0	6	3	5
Pifo_I	12855.7	13676.5	24129	25138	18468	24103	30281	32773
Pifo_LTR	4184.57	4562.07	8593	7602	5853	7646	10657	10770
Polinton-1_DY	26.5711	32.0112	55	52	33	79	58	67
Polinton-2_DEu	5.12442	2.51069	6	8	13	7	6	3
QUASIMODO2-I_DM	23827.4	13758.9	40056	44487	41001	27601	28871	31210
QUASIMODO2-LTR_DM	5095.38	2207.83	8493	9438	8916	4542	4736	4792
QUASIMODO_I	26977.8	29710.7	47436	52076	42631	55642	65013	68684
QUASIMODO_LTR	7264.15	7937.22	13243	13648	11383	15946	16714	17922
R1-1B_DK	1.32855	0.784589	1	3	3	1	3	1
R1-1_DBi	65.6685	102.467	108	109	129	241	198	214
R1-1_DEr	0.759174	2.03993	1	1	2	2	3	8
R1-1_DSi	3103.69	6036.79	5153	5334	5866	12066	12425	13980
R1-1_DYa	1323.62	1407.24	2208	2525	2241	2804	2910	3254
R1-2_DM	393.821	488.015	671	719	685	943	1004	1163
R1-3_DEl	109.511	166.804	203	213	161	356	361	346
R1-3_DEu	204.977	328.586	422	409	249	667	635	792
R1-3_DK	0	0	0	0	0	0	0	0
R1-3_DYa	2.65711	3.29528	2	8	4	6	5	10
R1-5_DYa	1385.87	1354.83	2373	2612	2317	2807	2793	3034
R1A_DAn	540.722	1009.14	888	974	987	2191	1994	2246
R1_DEr	4943.93	7195.47	8632	9417	8000	15296	14131	16428
R1_DM	182960	251065	317443	350592	295961	520920	517851	561209
R1_DSe	52839.8	86899.2	89449	101375	87583	179958	170495	203335
R1_DSi	66464.5	90036.3	114404	127638	108152	189644	182324	201812
R1_DYa	24427.6	35237.6	41781	47395	39530	74767	71958	77836
R2_DM	7622.29	14445.1	12027	15071	13063	30289	28654	33112
R2_DPs	13.0957	15.221	16	24	29	33	30	34
R2_DSe	2633.19	4081.43	4202	5286	4386	8710	8364	8936
R2_DSi	3259.32	5357.02	5223	6415	5535	11172	11011	11956
R2_DYa	680.22	998.468	1064	1361	1159	2219	1960	2184
REP-1_DTa	1.51835	3.92295	2	4	2	6	8	11
REP-2_DTa	0.379587	0.784589	0	0	2	0	2	3
ROOA_I	47477.2	46806.7	81213	81062	87877	99748	98289	100251
ROOA_LTR	974.779	981.364	1726	1686	1724	2089	2055	2110
ROO_I	264684	215917	442554	463127	488910	465955	433441	476592
ROO_LTR	39431.9	29548.4	71492	65565	70705	57384	60817	70104
ROVER_DM	27368.6	27294.5	42713	54031	47458	56075	56317	61549
Rehavkus-1_DY	3446.46	4264.24	5338	6147	6674	9326	8993	8856
STALKER2_I	45644.6	46799.5	93124	84642	62730	78401	109901	109940
STALKER2_LTR	2039.14	2111.64	4091	3881	2772	3731	4923	4803
STALKER3_LTR	4764.57	5352.94	8727	8845	7532	9916	12051	12146
STALKER4_I	93360.9	111460	157303	168673	165932	236073	234397	239835
STALKER4_LTR	8496.67	10465.2	14401	14889	15478	21654	20249	24789
S_DM	17782.5	15471.9	29587	36938	27169	32168	28590	37841
TABOR_DA-I	206.685	255.933	367	385	337	493	546	592
TABOR_I	23416	23451.4	41419	45372	36585	43117	53123	53210
TABOR_LTR	3451.96	3653.68	6015	6947	5226	6494	8377	8413
TAHRE	193.969	80.4989	332	398	292	175	161	177
TART	56188.3	18445.2	99482	108755	87813	41167	36947	39433
TART_B1	170163	65393	293214	329535	273821	133127	123251	160356
TC1-2_DM	2460.86	3657.13	4073	4416	4477	7374	7788	8144
TC1_DM	537.305	749.597	892	1034	905	1471	1757	1549
TIRANT_I	873.429	555.175	1510	1640	1452	1142	1215	1181
TIRANT_LTR	249.199	373.151	459	443	411	762	782	834
TOM_I	43.8423	49.1153	71	92	68	118	89	106
TRANSIB2	12601.7	9144.08	22005	23165	21227	18453	18837	20983
TRANSIB3	148.608	1125.26	214	294	275	2194	2295	2682
TRANSPAC_I	6730.45	7123.76	11195	13116	11151	14864	15170	15364
TRANSPAC_LTR	3583.68	1657.99	5728	7335	5819	3267	3532	3767
Transib-1_DRh	65.0991	94.3076	127	106	110	207	198	196
Transib-3_DF	0.379587	0.313836	0	2	0	1	1	0
Transib-3_DRh	0	0.313836	0	0	0	2	0	0
Transib-4_DBi	0	0.313836	0	0	0	1	1	0
Transib-N1_DM	31.1261	4.07986	52	43	69	8	12	6
Transib1	524.969	1411.48	895	898	973	3010	2937	3048
Transib4	112.168	138.715	164	220	207	276	263	345
Transib5	3714.64	2372.6	6273	6703	6596	4900	5176	5044
ZAM_I	7325.65	9031.72	12413	14777	11408	17538	19902	20117
ZAM_LTR	655.926	976.814	1077	1371	1008	1881	1983	2361
hAT-1_DSi	37.9587	66.2193	58	74	68	142	125	155
hAT-2_DSe	280.704	1065.63	477	496	506	2259	2262	2270
hAT-2_DY	145.951	84.4218	288	236	245	141	172	225
hAT-4_DK	38.3383	15.8487	66	73	63	42	35	24
hAT-N1B_DBp	113.496	163.352	224	175	199	344	377	320
hAT-N1_DBp	0	0	0	0	0	0	0	0
