# Supplementary material for: Adaptive evolution of an essential telomere protein restricts telomeric retrotransposons
Source: eLife. 2020 Dec 22;9:e60987. doi: 10.7554/eLife.60987 (PMC7755394; doi:10.7554/eLife.60987)
Supplement: Figure 2—source data 3. [file elife-60987-fig2-data3.xlsx]

## Sheet: Sheet1
Figure 2–Source Data 3. Quantification of H3K9me3 signal at the tip of chromosome X.
strain	individual	nucleus	internal_band_width	Chromosome_end_width	H3K9me3_signal_intensity	Normalization_factor	Normalized_H3K9me3_signal
HOAP[mel]	1	1	2.491	1.543	206.182	1.96051	105.167
HOAP[mel]	1	2	3.196	1.687	731.577	2.32199	315.064
HOAP[mel]	1	3	4.492	2.975	703.49	3.65564	192.44
HOAP[mel]	1	4	3.725	2.232	341.644	2.88344	118.485
HOAP[mel]	1	5	4.907	3.313	2247.12	4.03198	557.324
HOAP[mel]	1	6	4.327	2.431	1489.54	3.24329	459.269
HOAP[mel]	1	7	5.69	3.649	243.852	4.55662	53.5159
HOAP[mel]	1	8	5.435	2.333	557.521	3.56088	156.568
HOAP[mel]	1	9	9.196	5.007	1863.69	6.7856	274.653
HOAP[mel]	1	10	8.903	4.985	4085.3	6.66194	613.23
HOAP[mel]	1	11	5.545	3.527	1846.65	4.42235	417.572
HOAP[mel]	1	12	9.002	5.035	426.761	6.73239	63.3892
HOAP[mel]	1	13	5.858	3.349	609.75	4.42927	137.664
HOAP[mel]	1	14	9.547	4.77	239.242	6.74827	35.4524
HOAP[mel]	1	15	6.479	4.267	1959.92	5.25794	372.755
HOAP[mel]	2	1	3.739	1.918	122.862	2.67795	45.8793
HOAP[mel]	2	2	4.566	2.767	176.39	3.55445	49.625
HOAP[mel]	2	3	3.897	2.114	875.501	2.87024	305.027
HOAP[mel]	2	4	4.878	3.247	851.702	3.97981	214.006
HOAP[mel]	2	5	3.511	3.01	443.288	3.25086	136.36
HOAP[mel]	2	6	4.599	2.577	410.551	3.44262	119.255
HOAP[mel]	2	7	5.426	3.255	920.546	4.20257	219.043
HOAP[mel]	2	8	6.995	3.609	958.8	5.02444	190.827
HOAP[mel]	2	9	3.76	3.03	222.799	3.37532	66.0081
HOAP[mel]	2	10	4.712	4.234	923.1	4.46661	206.667
HOAP[mel]	2	11	5.288	3.442	742.046	4.2663	173.932
HOAP[mel]	2	12	4.828	3.312	601.803	3.99879	150.496
HOAP[mel]	2	13	5.086	3.803	410.297	4.39796	93.2926
HOAP[mel]	2	14	4.008	2.843	494.701	3.37561	146.552
HOAP[mel]	2	15	4.248	3.374	216.718	3.78586	57.2439
HOAP[mel]	2	16	4.835	4.799	1182.08	4.81697	245.399
HOAP[mel]	2	17	3.911	2.818	229.964	3.31982	69.27
HOAP[mel]	2	18	4.732	3.148	586.652	3.85958	151.999
HOAP[mel]	2	19	3.432	2.488	651.152	2.92213	222.835
HOAP[mel]	2	20	5.517	3.759	1070.61	4.55394	235.095
HOAP[mel]	2	21	4.002	3.671	788.993	3.83293	205.846
HOAP[mel]	2	22	4.493	3.104	739.17	3.73447	197.932
HOAP[mel]	2	23	4.656	3.286	918.059	3.91147	234.709
HOAP[mel]	2	24	3.459	2.903	431.166	3.16883	136.065
HOAP[mel]	2	25	4.216	3.139	651.16	3.63786	178.995
HOAP[mel]	2	26	4.774	2.843	1038.39	3.68408	281.859
HOAP[mel]	2	27	7.802	4.722	765.092	6.06968	126.051
HOAP[mel]	3	1	3.796	2.312	443.7	2.96249	149.773
HOAP[mel]	3	2	3.264	2.201	372.3	2.68031	138.902
HOAP[mel]	3	3	2.458	1.934	293.251	2.18031	134.499
HOAP[mel]	3	4	7.921	3.343	286.954	5.14586	55.764
HOAP[mel]	3	5	6.495	4.367	711.839	5.32575	133.66
HOAP[mel]	3	6	5.203	3.253	311.868	4.11404	75.8058
HOAP[mel]	3	7	4.84	2.874	433.426	3.72963	116.212
HOAP[mel]	3	8	4.937	3.903	915.59	4.38966	208.579
HOAP[mel]	3	9	5.032	4.163	258.072	4.57692	56.3854
HOAP[mel]	3	10	4.183	2.48	350.309	3.22084	108.763
HOAP[mel]	3	11	8.849	5.067	1520.7	6.69611	227.102
HOAP[mel]	3	12	5.476	4.163	851.925	4.77458	178.429
HOAP[mel]	3	13	8.97	4.024	1683.91	6.00793	280.28
HOAP[mel]	3	14	8.433	3.003	728.55	5.03233	144.774
HOAP[mel]	3	15	6.752	3.718	889.986	5.01038	177.628
HOAP[mel]	3	16	6.965	4.024	919.615	5.29407	173.707
HOAP[mel]	3	17	8.872	3.6	863.834	5.65148	152.851
HOAP[mel]	3	18	7.334	3.811	273.948	5.28676	51.8177
HOAP[mel]	3	19	5.026	2.461	170.022	3.51696	48.3436
HOAP[mel]	3	20	4.9	2.444	150.23	3.46058	43.4118
HOAP[mel]	3	21	7.558	3.889	820.063	5.42154	151.26
HOAP[mel]	3	22	3.544	3.891	1210.17	3.71345	325.888
HOAP[mel]	3	23	7.686	3.288	1082.87	5.02708	215.406
HOAP[mel]	3	24	10.69	5.737	1928.49	7.83125	246.255
HOAP[mel]	3	25	7.369	2.885	1321.64	4.61081	286.64
HOAP[mel]	3	26	6.671	3.188	855.17	4.61163	185.438
HOAP[mel]	3	27	7.497	4.636	1544.62	5.89543	262.003
HOAP[mel]	3	28	7.181	3.914	1425.2	5.30155	268.827
HOAP[mel]	3	29	7.875	4.533	995.234	5.97473	166.574
HOAP[mel]	3	30	8.804	3.614	1317.7	5.64071	233.606
HOAP[mel]	3	31	6.697	4.428	851.898	5.44558	156.438
HOAP[mel]	3	32	8.07	4.768	1429.12	6.20304	230.39
HOAP[mel]	3	33	8.942	4.249	619.749	6.16397	100.544
HOAP[mel]	3	34	4.703	3.537	308.436	4.07854	75.624
HOAP[mel]	3	35	7.905	3.499	1134.56	5.25924	215.726
HOAP[yak]	1	1	4.937	1.533	112.816	2.75108	41.008
HOAP[yak]	1	2	4.124	1.97	68.5297	2.85031	24.0429
HOAP[yak]	1	3	5.556	1.97	112.793	3.30837	34.0932
HOAP[yak]	1	4	5.084	2.023	112.843	3.20701	35.1863
HOAP[yak]	1	5	9.826	3.812	6.63128	6.12019	1.08351
HOAP[yak]	1	6	11.675	5.269	59.7742	7.84319	7.62116
HOAP[yak]	1	7	11.235	5.818	603.371	8.08488	74.6296
HOAP[yak]	1	8	5.556	3.766	48.0603	4.57426	10.5067
HOAP[yak]	1	9	5.797	3.826	59.7232	4.70949	12.6815
HOAP[yak]	1	10	7.19	5.598	46.4482	6.34426	7.32129
HOAP[yak]	1	11	9.329	4.192	1141.38	6.25357	182.516
HOAP[yak]	1	12	10.568	3.933	114.237	6.44701	17.7194
HOAP[yak]	2	1	9.862	5.123	836.136	7.10796	117.634
HOAP[yak]	2	2	6.838	5.943	471.15	6.37481	73.908
HOAP[yak]	2	3	4.014	2.441	159.769	3.1302	51.041
HOAP[yak]	2	4	4.03	2.03	159.196	2.86023	55.6585
HOAP[yak]	2	5	5.332	2.944	154.253	3.962	38.9331
HOAP[yak]	2	6	4.446	3.458	174.77	3.921	44.5727
HOAP[yak]	2	7	3.877	2.207	76.8495	2.92516	26.2719
HOAP[yak]	2	8	5.453	3.788	329.389	4.54488	72.4748
HOAP[yak]	2	9	6.707	3.989	257.549	5.17245	49.7924
HOAP[yak]	2	10	9.301	4.541	826.201	6.49891	127.129
HOAP[yak]	2	11	7.308	2.795	127.501	4.5195	28.2113
HOAP[yak]	2	12	4.9	3.067	86.6996	3.87664	22.3647
HOAP[yak]	3	1	4.346	3.726	954.09	4.02408	237.095
HOAP[yak]	3	2	6.308	3.049	266.643	4.38555	60.8004
HOAP[yak]	3	3	5.878	4.417	717.415	5.0954	140.797
HOAP[yak]	3	4	2.885	2.02	18.9425	2.41406	7.84671
HOAP[yak]	3	5	3.196	2.056	45.451	2.56339	17.7308
HOAP[yak]	3	6	3.528	2.093	167.693	2.71737	61.7116
HOAP[yak]	3	7	4.662	1.612	151.171	2.74138	55.1442
HOAP[yak]	3	8	6.061	3.689	296.853	4.72853	62.7791
HOAP[yak]	3	9	3.203	1.736	65.947	2.35805	27.9667
HOAP[yak]	3	10	6.356	2.93	189.635	4.31545	43.9433
HOAP[yak]	3	11	4.599	2.247	52.8329	3.21465	16.4351
HOAP[yak]	3	12	2.459	1.765	46.7062	2.0833	22.4194
HOAP[yak]	3	13	5.837	2.451	66.2958	3.78239	17.5275
HOAP[yak]	3	14	4.179	2.377	56.1884	3.15174	17.8277
HOAP[yak]	3	15	3.196	1.517	65.96	2.20189	29.956
HOAP[yak]	3	16	3.966	2.069	109.961	2.86455	38.3867
HOAP[yak]	3	17	5.422	3.53	272.139	4.37489	62.2049
HOAP[yak]	3	18	4.535	3.96	178.499	4.23776	42.1211
HOAP[yak]	3	19	2.788	2.291	94.3509	2.52731	37.3325
HOAP[yak]	3	20	2.434	1.887	109.65	2.14312	51.1636
