# Supplementary material for: Adaptive evolution of an essential telomere protein restricts telomeric retrotransposons
Source: eLife. 2020 Dec 22;9:e60987. doi: 10.7554/eLife.60987 (PMC7755394; doi:10.7554/eLife.60987)
Supplement: Figure 3—source data 1. — ‘Gen’=generation. [file elife-60987-fig3-data1.xlsx]

## Sheet: Sheet1
Figure 3–Source Data 1. Change in read count across original "O" lines and replicated lines ("A", "B", "C"). "Gen" = generation.
transgene	time comparison	time_point	TE_consensus	#Telomeric_TE_reads	Library_size (total #reads)	Normalization (rpm)
HOAP[mel]_O	G0-G50	0	HeT-A	52242	62999456	829.245
HOAP[mel]_O	G0-G50	0	TART	33928	62999456	538.544
HOAP[mel]_O	G0-G50	0	TAHRE	7788	62999456	123.62
HOAP[mel]_O	G0-G50	20	HeT-A	63364	82444252	768.568
HOAP[mel]_O	G0-G50	20	TART	42899	82444252	520.339
HOAP[mel]_O	G0-G50	20	TAHRE	10309	82444252	125.042
HOAP[mel]_O	G0-G50	50	HeT-A	43005	41545647	1035.13
HOAP[mel]_O	G0-G50	50	TART	25475	41545647	613.181
HOAP[mel]_O	G0-G50	50	TAHRE	4679	41545647	112.623
HOAP[yak]_O	G0-G50	0	HeT-A	67998	63900132	1064.13
HOAP[yak]_O	G0-G50	0	TART	42687	63900132	668.027
HOAP[yak]_O	G0-G50	0	TAHRE	9223	63900132	144.335
HOAP[yak]_O	G0-G50	20	HeT-A	119486	80272233	1488.51
HOAP[yak]_O	G0-G50	20	TART	46430	80272233	578.407
HOAP[yak]_O	G0-G50	20	TAHRE	20687	80272233	257.711
HOAP[yak]_O	G0-G50	50	HeT-A	85581	37136837	2304.48
HOAP[yak]_O	G0-G50	50	TART	27808	37136837	748.798
HOAP[yak]_O	G0-G50	50	TAHRE	9792	37136837	263.674
HOAP[mel]_replicated	G0	0	HeT-A	48452	41267159	1174.11
HOAP[mel]_replicated	G0	0	TART	14173	41267159	343.445
HOAP[mel]_replicated	G0	0	TAHRE	4804	41267159	116.412
HOAP[mel]_A	G0-G20	10	HeT-A	37110	37574120	987.648
HOAP[mel]_A	G0-G20	10	TART	7816	37574120	208.016
HOAP[mel]_A	G0-G20	10	TAHRE	3228	37574120	85.9102
HOAP[mel]_B	G0-G20	10	HeT-A	39393	40039913	983.843
HOAP[mel]_B	G0-G20	10	TART	9727	40039913	242.933
HOAP[mel]_B	G0-G20	10	TAHRE	2841	40039913	70.9542
HOAP[mel]_C	G0-G20	10	HeT-A	36543	36391974	1004.15
HOAP[mel]_C	G0-G20	10	TART	8650	36391974	237.69
HOAP[mel]_C	G0-G20	10	TAHRE	3101	36391974	85.2111
HOAP[mel]_A	G0-G20	20	HeT-A	37265	34719049	1073.33
HOAP[mel]_A	G0-G20	20	TART	16830	34719049	484.748
HOAP[mel]_A	G0-G20	20	TAHRE	3222	34719049	92.8021
HOAP[mel]_B	G0-G20	20	HeT-A	35253	36565612	964.103
HOAP[mel]_B	G0-G20	20	TART	11292	36565612	308.815
HOAP[mel]_B	G0-G20	20	TAHRE	2647	36565612	72.3904
HOAP[mel]_C	G0-G20	20	HeT-A	33230	35735784	929.88
HOAP[mel]_C	G0-G20	20	TART	9590	35735784	268.358
HOAP[mel]_C	G0-G20	20	TAHRE	2622	35735784	73.3718
HOAP[yak]_replicated	G0	0	HeT-A	53082	39000929	1361.04
HOAP[yak]_replicated	G0	0	TART	13107	39000929	336.069
HOAP[yak]_replicated	G0	0	TAHRE	4115	39000929	105.51
HOAP[yak]_A	G0-G20	10	HeT-A	59265	33693414	1758.95
HOAP[yak]_A	G0-G20	10	TART	20947	33693414	621.694
HOAP[yak]_A	G0-G20	10	TAHRE	6792	33693414	201.582
HOAP[yak]_B	G0-G20	10	HeT-A	69189	36221185	1910.18
HOAP[yak]_B	G0-G20	10	TART	21512	36221185	593.907
HOAP[yak]_B	G0-G20	10	TAHRE	7539	36221185	208.138
HOAP[yak]_C	G0-G20	10	HeT-A	78087	41287946	1891.28
HOAP[yak]_C	G0-G20	10	TART	35278	41287946	854.438
HOAP[yak]_C	G0-G20	10	TAHRE	9206	41287946	222.971
HOAP[yak]_A	G0-G20	20	HeT-A	73312	34397321	2131.33
HOAP[yak]_A	G0-G20	20	TART	24648	34397321	716.567
HOAP[yak]_A	G0-G20	20	TAHRE	8141	34397321	236.675
HOAP[yak]_B	G0-G20	20	HeT-A	72991	35895968	2033.4
HOAP[yak]_B	G0-G20	20	TART	25971	35895968	723.507
HOAP[yak]_B	G0-G20	20	TAHRE	7049	35895968	196.373
HOAP[yak]_C	G0-G20	20	HeT-A	93465	41831009	2234.35
HOAP[yak]_C	G0-G20	20	TART	32201	41831009	769.788
HOAP[yak]_C	G0-G20	20	TAHRE	11006	41831009	263.106
