# Supplementary material for: Adaptive evolution of an essential telomere protein restricts telomeric retrotransposons
Source: eLife. 2020 Dec 22;9:e60987. doi: 10.7554/eLife.60987 (PMC7755394; doi:10.7554/eLife.60987)
Supplement: Figure 4—source data 1. [file elife-60987-fig4-data1.xlsx]

## Sheet: Sheet1
Figure 4–Source Data 1. HeT-A signal normalization and quantification data.
strain	individual	nucleus#	Chromosome	internal_band_width	Chromosome_end_width	HeTA_signal_intensity	Normalization_factor	Normalized_HeTA_signal
HOAP[mel]	1	1	2L	5.62	3.41	0	4.37769	0
HOAP[mel]	1	2	2L	4.77	3.78	0	4.24625	0
HOAP[mel]	1	3	2L	3.2	1.11	0	1.88468	0
HOAP[mel]	1	4	2L	2.62	1.71	32.7953	2.11665	15.494
HOAP[mel]	1	5	2L	4.3	4.81	101.808	4.54786	22.386
HOAP[mel]	1	6	2L	4.32	6.07	0	5.12078	0
HOAP[mel]	1	7	2L	3.81	3.69	114.806	3.74952	30.6187
HOAP[mel]	1	8	2L	3.9	4.75	0	4.30407	0
HOAP[mel]	1	9	2L	3.66	4.36	0	3.9947	0
HOAP[mel]	1	10	2L	3.7	8.18	49.2012	5.50145	8.94331
HOAP[mel]	2	1	2L	4.58	5.22	28.6998	4.88954	5.86963
HOAP[mel]	2	2	2L	4.51	3.43	409.974	3.9331	104.237
HOAP[mel]	2	3	2L	4.7	6.73	8.2066	5.62414	1.45917
HOAP[mel]	2	4	2L	4.54	4.58	705.22	4.55996	154.655
HOAP[mel]	2	5	2L	4.24	4.48	0	4.35835	0
HOAP[mel]	2	6	2L	4.12	6.24	0	5.07038	0
HOAP[mel]	2	9	2L	5.3	9.6	4.08	7.13302	0.571988
HOAP[mel]	2	10	2L	3.2	3.8	492.133	3.48712	141.129
HOAP[mel]	2	11	2L	1.93	1.88	57.0003	1.90484	29.924
HOAP[mel]	2	12	2L	2.45	6.19	24.5604	3.89429	6.30678
HOAP[mel]	3	2	2L	4.27	2.84	114.818	3.48236	32.9714
HOAP[mel]	3	3	2L	4.67	3.91	57.4003	4.27314	13.4328
HOAP[mel]	3	4	2L	4.32	4.7	492.787	4.506	109.363
HOAP[mel]	3	5	2L	3.69	5.7	20.4921	4.58617	4.46823
HOAP[mel]	3	6	2L	4.44	6.72	8.19652	5.46231	1.50056
HOAP[mel]	3	7	2L	4.63	2.91	16.32	3.6706	4.44614
HOAP[mel]	3	8	2L	3.59	4.41	0	3.97893	0
HOAP[mel]	3	11	2L	4.66	2.88	0	3.66344	0
HOAP[mel]	3	12	2L	4.27	3.95	8.16	4.10688	1.98691
HOAP[mel]	3	15	2L	5.76	7.3	147.605	6.48444	22.7629
HOAP[yak]	1	2	2L	2.32	2.37	658.41	2.34487	280.788
HOAP[yak]	1	3	2L	3.54	2.03	1391.12	2.68071	518.938
HOAP[yak]	1	4	2L	2.99	3.24	4367.81	3.11249	1403.32
HOAP[yak]	1	5	2L	4.82	2.88	2416.04	3.7258	648.462
HOAP[yak]	1	6	2L	2.58	1.38	1003.01	1.8869	531.564
HOAP[yak]	1	7	2L	2.95	2.46	4865.82	2.69388	1806.25
HOAP[yak]	1	8	2L	2.66	4.05	1691.74	3.28222	515.424
HOAP[yak]	1	9	2L	4.71	5.74	2466.79	5.19956	474.424
HOAP[yak]	1	10	2L	2.98	2.93	1082.22	2.95489	366.247
HOAP[yak]	1	11	2L	3.79	3.4	2409.37	3.58971	671.188
HOAP[yak]	1	12	2L	5.26	4.07	2296.12	4.6269	496.255
HOAP[yak]	2	1	2L	2.93	1.91	1549.89	2.36565	655.165
HOAP[yak]	2	2	2L	2.43	2.05	1009.61	2.23193	452.347
HOAP[yak]	2	3	2L	2.04	2.19	704.055	2.11367	333.096
HOAP[yak]	2	4	2L	3.04	2.93	1583.81	2.98449	530.678
HOAP[yak]	2	5	2L	2.72	1.89	1181.86	2.26733	521.253
HOAP[yak]	2	6	2L	2.7	1.62	683.91	2.09141	327.009
HOAP[yak]	2	7	2L	3.45	3.71	2801.09	3.57764	782.944
HOAP[yak]	2	8	2L	3.62	2.92	2378.97	3.25122	731.716
HOAP[yak]	2	9	2L	2.48	3.25	1573.48	2.83901	554.235
HOAP[yak]	2	10	2L	2.91	2.67	2336.66	2.78742	838.289
HOAP[yak]	2	11	2L	3.36	1.79	896.613	2.45243	365.602
HOAP[yak]	3	1	2L	3.02	2.65	1586.12	2.82896	560.673
HOAP[yak]	3	2	2L	2.36	2.68	1140.83	2.51492	453.627
HOAP[yak]	3	3	2L	2.23	3.26	10.9548	2.69626	4.06297
HOAP[yak]	3	4	2L	2.96	2.29	0	2.60354	0
HOAP[yak]	3	5	2L	2.58	3.15	660.195	2.85079	231.583
HOAP[yak]	3	6	2L	3.72	2.06	585.735	2.76825	211.59
HOAP[yak]	3	7	2L	2.08	2.27	545.384	2.17292	250.991
HOAP[yak]	3	8	2L	3.96	4.72	3137.08	4.32333	725.616
HOAP[yak]	3	9	2L	2.56	2.77	724.297	2.66293	271.992
HOAP[yak]	3	10	2L	3.05	3.73	449.152	3.37291	133.165
HOAP[mel]	1	2	2R	5.61	4.95	747.428	5.26968	141.836
HOAP[mel]	1	3	2R	3.13	2.03	170.16	2.52069	67.5053
HOAP[mel]	1	4	2R	3.73	1.88	0	2.64809	0
HOAP[mel]	1	5	2R	4.7	3.08	70.2214	3.80473	18.4563
HOAP[mel]	1	6	2R	4.59	3.24	16.4015	3.85637	4.25309
HOAP[mel]	1	7	2R	4.57	4.37	0	4.46888	0
HOAP[mel]	1	8	2R	4.4	3.55	8.16	3.95221	2.06467
HOAP[mel]	1	9	2R	3.91	2.09	0	2.85865	0
HOAP[mel]	1	10	2R	3.91	5.05	8.16	4.44359	1.83635
HOAP[mel]	1	11	2R	1.95	3.04	147.086	2.43475	60.4111
HOAP[mel]	2	1	2R	1.75	1.95	208.964	1.8473	113.119
HOAP[mel]	2	2	2R	4.14	3.84	73.7872	3.98718	18.5061
HOAP[mel]	2	3	2R	3.63	2.85	41.0393	3.21644	12.7592
HOAP[mel]	2	4	2R	7.24	7.58	0	7.40805	0
HOAP[mel]	2	5	2R	3.64	3.77	0	3.70443	0
HOAP[mel]	2	9	2R	4.87	5.07	53.3006	4.96899	10.7266
HOAP[mel]	2	10	2R	4.21	4.47	12.3041	4.33805	2.83633
HOAP[mel]	2	11	2R	2.58	2.1	1029.16	2.32766	442.145
HOAP[mel]	2	12	2R	5.12	4.16	1693.27	4.61511	366.897
HOAP[mel]	2	13	2R	5.4	4.37	3247.25	4.85778	668.464
HOAP[mel]	3	5	2R	4.37	3.69	24.5604	4.01563	6.11621
HOAP[mel]	3	6	2R	6.13	4.58	1918.77	5.29862	362.125
HOAP[mel]	3	7	2R	5.89	4.18	2640.4	4.96187	532.138
HOAP[mel]	3	8	2R	4.19	3.18	196.823	3.65023	53.9207
HOAP[mel]	3	10	2R	5.13	4.02	619.12	4.54121	136.334
HOAP[mel]	3	11	2R	5.61	3.39	561.694	4.36095	128.801
HOAP[mel]	3	12	2R	5.55	4.29	143.938	4.8795	29.4986
HOAP[mel]	3	13	2R	3.55	1.67	471.501	2.43485	193.647
HOAP[mel]	3	14	2R	5.91	3.86	1562.05	4.77625	327.045
HOAP[mel]	3	15	2R	6.27	4.32	1496.59	5.20446	287.558
HOAP[yak]	1	1	2R	3.35	4.4	3087.13	3.83927	804.093
HOAP[yak]	1	2	2R	2.91	1.81	1833.54	2.29502	798.924
HOAP[yak]	1	4	2R	4.25	3.58	1728.84	3.90064	443.219
HOAP[yak]	1	6	2R	2.47	1.74	1359.25	2.07311	655.656
HOAP[yak]	1	7	2R	3.32	2.63	4865.82	2.95493	1646.68
HOAP[yak]	1	8	2R	2.93	3.22	763.221	3.07158	248.478
HOAP[yak]	1	9	2R	3.88	3.28	2334.92	3.56741	654.513
HOAP[yak]	1	10	2R	3.35	2.72	1011.43	3.01861	335.064
HOAP[yak]	1	11	2R	3.35	6.16	3886.52	4.54269	855.556
HOAP[yak]	1	12	2R	4.36	4.52	3994.76	4.43928	899.866
HOAP[yak]	2	1	2R	2.84	2.36	1656.32	2.5889	639.777
HOAP[yak]	2	2	2R	2.87	1.82	234.792	2.28548	102.732
HOAP[yak]	2	3	2R	1.47	1.42	1097.4	1.44478	759.557
HOAP[yak]	2	4	2R	2.65	1.78	673.553	2.17187	310.127
HOAP[yak]	2	5	2R	2.86	2.81	1556.72	2.83489	549.129
HOAP[yak]	2	6	2R	1.81	1.33	1506.1	1.55155	970.707
HOAP[yak]	2	7	2R	3.1	2.79	2801.09	2.94092	952.455
HOAP[yak]	2	8	2R	2.88	2.86	2378.97	2.86998	828.913
HOAP[yak]	2	9	2R	3.53	3.16	1333.75	3.33988	399.34
HOAP[yak]	2	10	2R	4.6	4.5	1387.81	4.54973	305.031
HOAP[yak]	3	1	2R	3.15	3.67	1359.15	3.40007	399.741
HOAP[yak]	3	2	2R	2.8	3.6	619.589	3.1749	195.152
HOAP[yak]	3	3	2R	1.48	2.3	1105.97	1.84499	599.443
HOAP[yak]	3	4	2R	4.07	3.26	824.007	3.64255	226.217
HOAP[yak]	3	5	2R	2.45	2.1	492.915	2.26826	217.31
HOAP[yak]	3	6	2R	3.63	4.93	3137.08	4.23035	741.564
HOAP[yak]	3	8	2R	3.35	2.5	1787.88	2.89396	617.799
HOAP[yak]	3	10	2R	3.1	3.23	2228.76	3.16433	704.337
HOAP[yak]	3	11	2R	2.55	3.78	3009.99	3.10467	969.503
HOAP[yak]	3	12	2R	0.981	0.99	228.658	0.98549	232.025
HOAP[mel]	1	2	3L	2.45	2.79	0	2.61448	0
HOAP[mel]	1	3	3L	2.79	2.36	0	2.56601	0
HOAP[mel]	1	5	3L	4.01	2.91	0	3.41601	0
HOAP[mel]	1	6	3L	4.07	4.75	12.3493	4.39687	2.80866
HOAP[mel]	1	7	3L	5.2	2.99	193.509	3.9431	49.0754
HOAP[mel]	1	8	3L	4.9	2.52	16.403	3.51397	4.66793
HOAP[mel]	1	9	3L	3.28	7.21	139.431	4.863	28.6719
HOAP[mel]	1	10	3L	3.18	2.65	323.925	2.90293	111.586
HOAP[mel]	1	11	3L	1.123	1	55.1282	1.05972	52.0216
HOAP[mel]	1	12	3L	2.04	2.29	256.506	2.16139	118.677
HOAP[mel]	2	1	3L	4.71	3.96	1828.74	4.31875	423.443
HOAP[mel]	2	3	3L	3.95	2.33	360.813	3.03373	118.934
HOAP[mel]	2	4	3L	2.79	3.85	0	3.27742	0
HOAP[mel]	2	5	3L	4.61	3.93	836.354	4.25644	196.491
HOAP[mel]	2	6	3L	3.93	4.7	0	4.29779	0
HOAP[mel]	2	5	3L	2.199	3	209.831	2.56846	81.695
HOAP[mel]	2	6	3L	1.756	0.889	48.2788	1.24943	38.6405
HOAP[mel]	2	9	3L	1.801	2.231	297.539	2.0045	148.435
HOAP[mel]	2	10	3L	1.605	2.126	115.923	1.84722	62.7551
HOAP[mel]	2	11	3L	2.037	2.199	288.874	2.11645	136.49
HOAP[mel]	3	1	3L	2.31	3.47	0	2.8312	0
HOAP[mel]	3	2	3L	1.97	1.52	176.284	1.73043	101.872
HOAP[mel]	3	4	3L	6.18	8.32	0	7.17061	0
HOAP[mel]	3	5	3L	4.29	2.36	557.535	3.18189	175.221
HOAP[mel]	3	6	3L	5.56	7.7	20.5028	6.54309	3.13351
HOAP[mel]	3	7	3L	5.24	4.13	225.485	4.65201	48.4704
HOAP[mel]	3	8	3L	4.91	5.23	41.0168	5.06747	8.09413
HOAP[mel]	3	12	3L	4.01	5.44	12.24	4.67059	2.62065
HOAP[mel]	3	13	3L	3.81	4.41	12.24	4.09904	2.98607
HOAP[mel]	3	12	3L	1.505	1.797	69.1592	1.64453	42.0541
HOAP[yak]	1	2	3L	3.42	2.86	1904.54	3.12749	608.966
HOAP[yak]	1	4	3L	3.92	4.15	4367.81	4.03336	1082.92
HOAP[yak]	1	6	3L	2.98	4.2	3245.11	3.5378	917.27
HOAP[yak]	1	7	3L	3.04	2.42	4865.82	2.71234	1793.95
HOAP[yak]	1	8	3L	1.8	1.32	1534.62	1.54143	995.586
HOAP[yak]	1	9	3L	4.97	5.92	4028.51	5.42424	742.686
HOAP[yak]	1	10	3L	2.19	2.98	953.895	2.55464	373.397
HOAP[yak]	1	11	3L	4.44	5.83	3886.52	5.08775	763.898
HOAP[yak]	1	12	3L	3.07	3.51	2090.07	3.28264	636.705
HOAP[yak]	1	13	3L	3.446	3.356	1131.2	3.4007	332.638
HOAP[yak]	2	1	3L	2.66	3.21	1122.86	2.92209	384.267
HOAP[yak]	2	3	3L	1.98	2.27	543.66	2.12005	256.438
HOAP[yak]	2	5	3L	2.39	2.47	607.763	2.42967	250.142
HOAP[yak]	2	6	3L	1.68	2.16	1506.1	1.90494	790.627
HOAP[yak]	2	8	3L	3.5	1.92	2051.31	2.5923	791.312
HOAP[yak]	2	9	3L	2.7	3.5	1550.02	3.07409	504.222
HOAP[yak]	2	10	3L	3.53	2.98	2336.66	3.24336	720.445
HOAP[yak]	2	11	3L	3.48	2.89	457.601	3.17131	144.294
HOAP[yak]	2	12	3L	2.594	3.837	1438.74	3.15487	456.037
HOAP[yak]	2	13	3L	2.645	2.419	1917.12	2.52948	757.912
HOAP[yak]	3	5	3L	2.58	3.78	714.288	3.12288	228.727
HOAP[yak]	3	7	3L	3.14	3.68	498.066	3.39929	146.52
HOAP[yak]	3	8	3L	2.64	2.29	1787.88	2.45878	727.143
HOAP[yak]	3	6	3L	2.116	3.001	1718.41	2.51994	681.924
HOAP[yak]	3	7	3L	2.982	3.516	1833.59	3.23801	566.271
HOAP[yak]	3	9	3L	1.823	1.604	402.299	1.71	235.263
HOAP[yak]	3	11	3L	2.869	3.365	1193.45	3.10712	384.103
HOAP[yak]	3	12	3L	2.05	2.89	770.252	2.43403	316.451
HOAP[yak]	3	13	3L	2.66	2.73	104.046	2.69477	38.6104
HOAP[yak]	3	14	3L	2.98	3.45	688.144	3.2064	214.616
HOAP[mel]	1	1	3R	3.59	3.32	212.842	3.45236	61.651
HOAP[mel]	1	2	3R	4.02	2.86	0	3.39075	0
HOAP[mel]	1	3	3R	3.17	2.37	7.406	2.74097	2.70197
HOAP[mel]	1	4	3R	4.46	3.27	295.245	3.81893	77.3111
HOAP[mel]	1	5	3R	4.09	2.07	354.807	2.90969	121.94
HOAP[mel]	1	6	3R	5.92	3.31	40.9742	4.42665	9.25626
HOAP[mel]	1	7	3R	4.46	2.74	135.324	3.49577	38.7107
HOAP[mel]	1	8	3R	3.03	1.9	209.102	2.39937	87.1486
HOAP[mel]	1	9	3R	3.19	1.87	0	2.4424	0
HOAP[mel]	1	10	3R	3.62	3.35	20.4707	3.48238	5.87837
HOAP[mel]	2	2	3R	3.68	3.49	106.626	3.58374	29.7527
HOAP[mel]	2	3	3R	5.42	6.63	110.704	5.99455	18.4675
HOAP[mel]	2	4	3R	8.33	8.19	106.607	8.2597	12.9068
HOAP[mel]	2	9	3R	6.12	3.8	0	4.82245	0
HOAP[mel]	2	10	3R	4.03	3.58	110.713	3.79834	29.1476
HOAP[mel]	2	11	3R	4.69	3.72	61.5643	4.17694	14.7391
HOAP[mel]	2	12	3R	8.14	5.48	151.739	6.67886	22.7193
HOAP[mel]	2	13	3R	1.819	3.349	521.131	2.46816	211.141
HOAP[mel]	2	14	3R	1.194	1.559	86.7559	1.36435	63.5878
HOAP[mel]	2	15	3R	1.642	1.749	46.981	1.69466	27.723
HOAP[mel]	3	5	3R	4.8	5.54	20.4981	5.15674	3.97501
HOAP[mel]	3	6	3R	5.37	5.83	828.192	5.59527	148.016
HOAP[mel]	3	7	3R	6.82	6.77	61.5053	6.79495	9.05161
HOAP[mel]	3	8	3R	3.94	3.62	0	3.77661	0
HOAP[mel]	3	9	3R	6.96	5.54	86.0862	6.20954	13.8635
HOAP[mel]	3	10	3R	7.12	5.09	2.48	6.02003	0.411958
HOAP[mel]	3	12	3R	5.6	4.25	94.3024	4.87852	19.3301
HOAP[mel]	3	13	3R	2.58	1.03	8.16	1.63015	5.00566
HOAP[mel]	3	14	3R	8.73	7.09	192.708	7.86738	24.4945
HOAP[mel]	3	15	3R	8.19	5.87	45.1061	6.93364	6.50541
HOAP[yak]	3	16	3R	2.87	2.34	1014.93	2.59149	391.642
HOAP[yak]	3	17	3R	3.18	2.98	1810.79	3.07838	588.228
HOAP[yak]	1	1	3R	2.8	3.55	1369.46	3.15278	434.366
HOAP[yak]	1	2	3R	3.64	2.55	1798.2	3.04664	590.224
HOAP[yak]	1	3	3R	2.52	2.59	2145.99	2.55476	839.996
HOAP[yak]	1	4	3R	2.76	3.04	2588.35	2.89662	893.576
HOAP[yak]	1	5	3R	3.79	4.74	1517.1	4.23847	357.935
HOAP[yak]	1	6	3R	3.1	2.77	3245.11	2.93036	1107.41
HOAP[yak]	1	7	3R	4.13	3.11	1478.97	3.58389	412.672
HOAP[yak]	1	8	3R	4.13	3.29	1477.31	3.68615	400.774
HOAP[yak]	1	9	3R	4.97	4.95	4028.51	4.95999	812.201
HOAP[yak]	1	10	3R	3.43	2.25	803.698	2.77804	289.304
HOAP[yak]	2	1	3R	3.1	3.13	1438.5	3.11496	461.804
HOAP[yak]	2	2	3R	3.73	3.63	965.622	3.67966	262.421
HOAP[yak]	2	3	3R	1.98	1.6	616.335	1.77989	346.277
HOAP[yak]	2	4	3R	1.84	1.9	646.68	1.86976	345.863
HOAP[yak]	2	5	3R	3.25	2.66	942.067	2.94024	320.405
HOAP[yak]	2	6	3R	2.62	2.7	1506.1	2.6597	566.266
HOAP[yak]	2	8	3R	3.77	3.71	1531.4	3.73988	409.48
HOAP[yak]	2	9	3R	3.42	2.97	1247.65	3.18707	391.474
HOAP[yak]	2	10	3R	3.61	3.35	1254.38	3.47757	360.707
HOAP[yak]	2	11	3R	3.35	2.84	1235.92	3.08448	400.691
HOAP[yak]	3	1	3R	2.14	2.39	1644.54	2.26155	727.172
HOAP[yak]	3	3	3R	2.7	2.51	396.719	2.60327	152.393
HOAP[yak]	3	4	3R	3.81	2.65	1009.54	3.1775	317.717
HOAP[yak]	3	5	3R	3.21	2.9	535.245	3.05107	175.429
HOAP[yak]	3	7	3R	2.77	2.36	569.069	2.55679	222.571
HOAP[yak]	3	8	3R	2.228	2.45	658.179	2.33636	281.711
HOAP[yak]	3	9	3R	2.454	2.435	296.989	2.44448	121.494
HOAP[yak]	3	10	3R	3.486	3.374	1057.82	3.42954	308.444
HOAP[yak]	3	11	3R	4.31	3.66	3886.52	3.97173	978.548
HOAP[yak]	3	12	3R	3.43	4.7	3714.38	4.0151	925.104
HOAP[mel]	1	1	X	3.46	2.63	55.9102	3.01659	18.5342
HOAP[mel]	1	3	X	3.31	2.34	0	2.78306	0
HOAP[mel]	1	5	X	3.2	1.97	226.178	2.51078	90.0829
HOAP[mel]	1	6	X	3.28	1.13	0	1.9252	0
HOAP[mel]	1	7	X	3.22	1.66	206.445	2.31197	89.2939
HOAP[mel]	1	8	X	3.46	2.18	0	2.74642	0
HOAP[mel]	1	9	X	2.38	2.84	142.045	2.59985	54.6358
HOAP[mel]	1	10	X	4.76	2.38	311.59	3.36583	92.5746
HOAP[mel]	1	11	X	1.782	1.418	100.193	1.58962	63.0299
HOAP[mel]	1	12	X	1.306	0.979	38.149	1.13074	33.738
HOAP[mel]	2	1	X	5.12	3.75	492.022	4.38178	112.288
HOAP[mel]	2	2	X	4.91	2.19	0	3.27916	0
HOAP[mel]	2	3	X	4.69	3.18	73.8072	3.86189	19.1117
HOAP[mel]	2	4	X	5.72	2.94	0	4.10083	0
HOAP[mel]	2	5	X	7.59	3.1	828.258	4.85067	170.751
HOAP[mel]	2	6	X	4.3	4.91	139.417	4.59489	30.3417
HOAP[mel]	2	9	X	4.99	3.43	639.645	4.13711	154.611
HOAP[mel]	2	10	X	3.07	4.1	360.775	3.54782	101.689
HOAP[mel]	2	11	X	2.48	1.98	971.776	2.21594	438.538
HOAP[mel]	2	12	X	4.75	4.46	492.787	4.60272	107.064
HOAP[mel]	3	5	X	4.8	2.82	24.6189	3.67913	6.69151
HOAP[mel]	3	6	X	5.33	3.61	1717.97	4.38649	391.65
HOAP[mel]	3	7	X	4.91	3.26	225.485	4.00082	56.3596
HOAP[mel]	3	8	X	3.18	3.98	12.291	3.55758	3.45487
HOAP[mel]	3	9	X	4.49	3.25	110.694	3.82001	28.9774
HOAP[mel]	3	10	X	4.5	3.48	127.098	3.95727	32.1176
HOAP[mel]	3	11	X	4.49	2.99	110.71	3.66403	30.2153
HOAP[mel]	3	13	X	3.05	1.85	45.0947	2.37539	18.9841
HOAP[mel]	3	14	X	6.22	3.68	65.5951	4.78431	13.7105
HOAP[mel]	3	15	X	6.08	4.78	4.08	5.39096	0.756823
HOAP[yak]	1	1	X	2.8	1.56	3087.13	2.08998	1477.11
HOAP[yak]	1	2	X	4.46	3.73	3199.4	4.0787	784.417
HOAP[yak]	1	3	X	3.93	2.43	986.057	3.09029	319.082
HOAP[yak]	1	4	X	5.02	3.53	1524.49	4.20958	362.147
HOAP[yak]	1	5	X	4	2.67	1292.18	3.26803	395.402
HOAP[yak]	1	6	X	3.02	3.06	916.663	3.03993	301.54
HOAP[yak]	1	7	X	4.11	2.93	1563.44	3.4702	450.534
HOAP[yak]	1	8	X	3.2	3.97	1073.75	3.56427	301.253
HOAP[yak]	1	9	X	5.72	4.2	1911.2	4.90143	389.927
HOAP[yak]	1	10	X	3.78	2.57	687.163	3.11683	220.469
HOAP[yak]	2	1	X	3.64	3.9	3714.38	3.76776	985.834
HOAP[yak]	2	3	X	3.6	1.11	391.639	1.999	195.918
HOAP[yak]	2	4	X	2.15	1.38	482.811	1.7225	280.297
HOAP[yak]	2	5	X	2.14	1.81	622.974	1.9681	316.537
HOAP[yak]	2	6	X	2.34	2.52	665.329	2.42833	273.986
HOAP[yak]	2	7	X	2.76	1.83	731.025	2.2474	325.276
HOAP[yak]	2	8	X	2.49	2.38	803.74	2.43438	330.162
HOAP[yak]	2	9	X	2.12	1.86	682.064	1.98575	343.479
HOAP[yak]	2	10	X	2.47	2.1	412.08	2.2775	180.935
HOAP[yak]	2	11	X	1.97	2.07	293.807	2.01938	145.494
HOAP[yak]	3	1	X	1.92	2.13	558.96	2.02228	276.401
HOAP[yak]	3	2	X	3.5	2.29	705.632	2.83108	249.245
HOAP[yak]	3	3	X	3.46	2.94	334.183	3.18942	104.779
HOAP[yak]	3	4	X	2.53	2.18	835.635	2.34849	355.818
HOAP[yak]	3	4	X	3.54	3.07	1696.8	3.29663	514.708
HOAP[yak]	3	6	X	5.97	2.56	450.847	3.90937	115.325
HOAP[yak]	3	7	X	2.66	2.14	562.309	2.38588	235.682
HOAP[yak]	3	8	X	3.15	2.6	950.64	2.86182	332.18
HOAP[yak]	3	11	X	3.474	3.493	938.399	3.48349	269.385
HOAP[yak]	3	12	X	3.14	2.56	3137.81	2.83521	1106.73
HOAP[yak]	3	13	X	2.39	1.39	1009.4	1.82266	553.807
HOAP[yak]	3	14	X	2.78	1.21	3009.99	1.83407	1641.16
HOAP[yak]	3	15	X	4.31	3.37	1992.26	3.81113	522.747
