# Supplementary material for: Adaptive evolution of an essential telomere protein restricts telomeric retrotransposons
Source: eLife. 2020 Dec 22;9:e60987. doi: 10.7554/eLife.60987 (PMC7755394; doi:10.7554/eLife.60987)
Supplement: Figure 4—source data 2. [file elife-60987-fig4-data2.xlsx]

## Sheet: Sheet1
Figure 4–Source Data 2. Quantification of telomere associations and non-telomeric HeT-A insertions.
strain	#nuclei	% of Telomere Associations	% of nuclei with >= 1 euchromatic insertion
cav[mel]	13	15	23
cav[mel]	13	23	23
cav[mel]	16	19	12.5
cav[mel]	14	7	21
cav[mel]	10	40	60
cav[mel]	24	12.5	16
cav[yak]	13	77	100
cav[yak]	13	77	85
cav[yak]	33	100	70
cav[yak]	12	83	92
cav[yak]	10	80	80
cav[yak]	15	87	93
% of Telomere Associations
Mann Whitney U test *** : p < 0.005
% of nuclei with >= 1 euchromatic insertion
Mann Whitney U test *** : p < 0.005
