# Supplementary material for: Adaptive evolution of an essential telomere protein restricts telomeric retrotransposons
Source: eLife. 2020 Dec 22;9:e60987. doi: 10.7554/eLife.60987 (PMC7755394; doi:10.7554/eLife.60987)
Supplement: Figure 4—source data 3. [file elife-60987-fig4-data3.xlsx]

## Sheet: Sheet1
Figure 4-Source Data 3. Lifetime male and female fertility in generation 50 HOAP[mel] and HOAP[yak] genotypes
Sex	replicate	genotype	progeny count
male	1	HOAP[mel]	644
male	2	HOAP[mel]	409
male	3	HOAP[mel]	407
male	4	HOAP[mel]	365
male	5	HOAP[mel]	463
male	6	HOAP[mel]	453
male	7	HOAP[mel]	275
male	8	HOAP[mel]	173
male	9	HOAP[mel]	521
male	10	HOAP[mel]	314
male	11	HOAP[mel]	470
male	12	HOAP[mel]	492
male	13	HOAP[mel]	304
male	14	HOAP[mel]	513
male	15	HOAP[mel]	568
male	16	HOAP[mel]	520
male	17	HOAP[mel]	335
male	18	HOAP[mel]	730
male	19	HOAP[mel]	395
male	20	HOAP[mel]	432
male	21	HOAP[mel]	518
male	22	HOAP[mel]	631
male	23	HOAP[mel]	542
male	24	HOAP[mel]	478
male	25	HOAP[mel]	436
male	26	HOAP[mel]	252
male	27	HOAP[mel]	268
male	28	HOAP[mel]	497
male	29	HOAP[mel]	387
male	30	HOAP[mel]	665
male	1	HOAP[yak]	322
male	2	HOAP[yak]	606
male	3	HOAP[yak]	640
male	4	HOAP[yak]	503
male	5	HOAP[yak]	624
male	6	HOAP[yak]	440
male	7	HOAP[yak]	373
male	8	HOAP[yak]	505
male	9	HOAP[yak]	122
male	10	HOAP[yak]	416
male	11	HOAP[yak]	739
male	12	HOAP[yak]	480
male	13	HOAP[yak]	578
male	14	HOAP[yak]	578
male	15	HOAP[yak]	914
male	16	HOAP[yak]	565
male	17	HOAP[yak]	379
male	18	HOAP[yak]	713
male	19	HOAP[yak]	241
male	20	HOAP[yak]	272
male	21	HOAP[yak]	591
male	22	HOAP[yak]	409
male	23	HOAP[yak]	456
male	24	HOAP[yak]	378
male	25	HOAP[yak]	528
male	26	HOAP[yak]	538
male	27	HOAP[yak]	639
male	28	HOAP[yak]	605
male	29	HOAP[yak]	401
male	30	HOAP[yak]	579
female	1	HOAP[mel]	1210
female	2	HOAP[mel]	982
female	3	HOAP[mel]	1105
female	4	HOAP[mel]	537
female	5	HOAP[mel]	996
female	6	HOAP[mel]	525
female	7	HOAP[mel]	1000
female	8	HOAP[mel]	976
female	9	HOAP[mel]	1241
female	10	HOAP[mel]	922
female	11	HOAP[mel]	774
female	12	HOAP[mel]	1289
female	13	HOAP[mel]	682
female	14	HOAP[mel]	1091
female	15	HOAP[mel]	1242
female	16	HOAP[mel]	1066
female	17	HOAP[mel]	1351
female	18	HOAP[mel]	1129
female	19	HOAP[mel]	1091
female	20	HOAP[mel]	986
female	21	HOAP[mel]	390
female	22	HOAP[mel]	923
female	23	HOAP[mel]	1039
female	24	HOAP[mel]	1007
female	25	HOAP[mel]	455
female	26	HOAP[mel]	891
female	27	HOAP[mel]	1310
female	28	HOAP[mel]	349
female	29	HOAP[mel]	1335
female	30	HOAP[mel]	548
female	1	HOAP[yak]	893
female	2	HOAP[yak]	678
female	3	HOAP[yak]	703
female	4	HOAP[yak]	802
female	5	HOAP[yak]	851
female	6	HOAP[yak]	683
female	7	HOAP[yak]	988
female	8	HOAP[yak]	399
female	9	HOAP[yak]	657
female	10	HOAP[yak]	769
female	11	HOAP[yak]	644
female	12	HOAP[yak]	630
female	13	HOAP[yak]	878
female	14	HOAP[yak]	526
female	15	HOAP[yak]	695
female	16	HOAP[yak]	670
female	17	HOAP[yak]	701
female	18	HOAP[yak]	782
female	19	HOAP[yak]	490
female	20	HOAP[yak]	1307
female	21	HOAP[yak]	570
female	22	HOAP[yak]	963
female	23	HOAP[yak]	711
female	24	HOAP[yak]	1005
female	25	HOAP[yak]	1163
female	26	HOAP[yak]	638
female	27	HOAP[yak]	893
female	28	HOAP[yak]	560
female	29	HOAP[yak]	891
female	30	HOAP[yak]	888
