# Supplementary material for: Adaptive evolution of an essential telomere protein restricts telomeric retrotransposons
Source: eLife journal article supplement (doi:10.7554/elife.60987), 2020-12-22
Supplement: figures [file elife-60987-figures-v1.pdf]

---

## Figures and figure supplements

Adaptive evolution of an essential telomere protein restricts telomeric retrotransposons

**Bastien Saint-Leandre *et al***

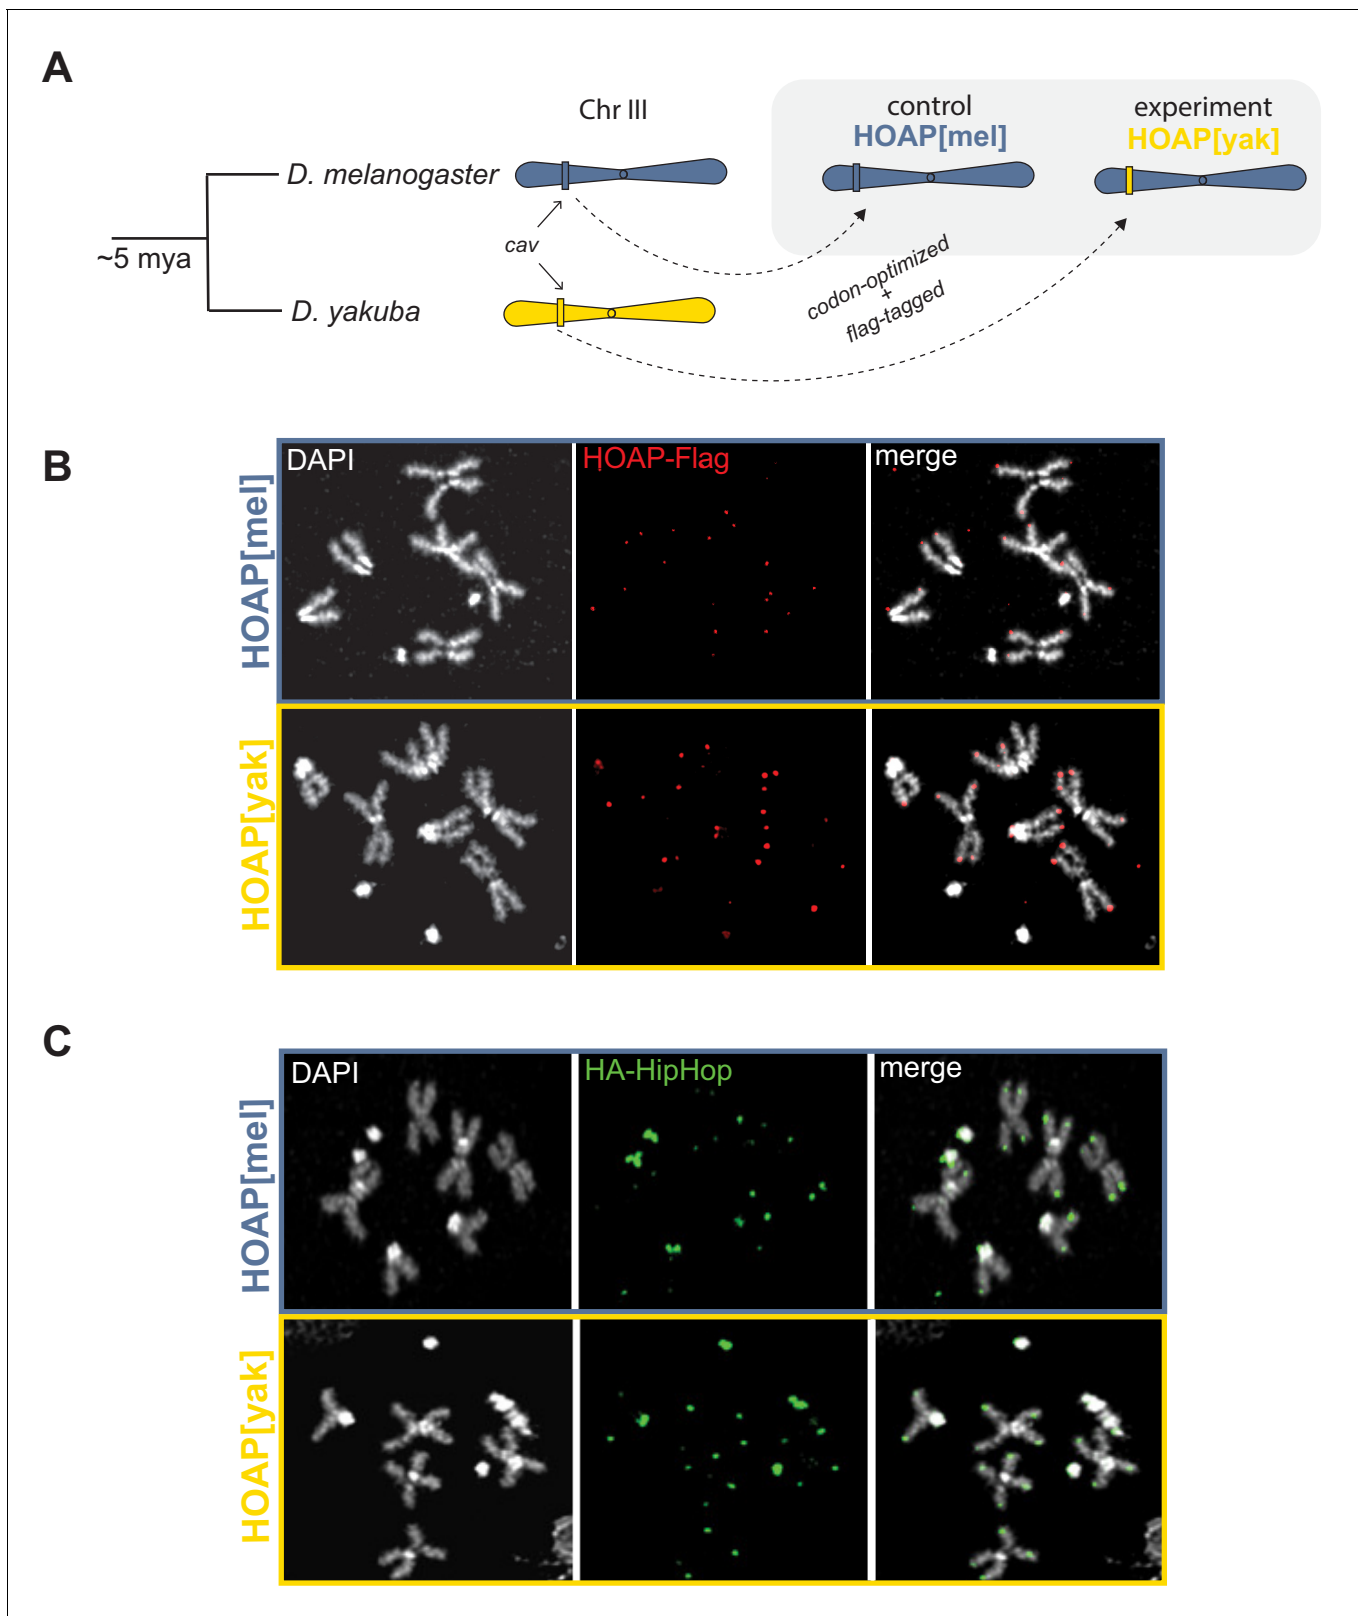

**Figure 1.** Allele swap strategy and phenotypic rescue by a diverged version of HOAP. **(A)** Using CRISPR/Cas9-mediated transgenesis, we replaced the native coding sequence of *cav*/HOAP with either a Flag-tagged *D. melanogaster* coding sequence or instead a Flag-tagged *D. yakuba* coding sequence. Both coding sequences were intron-less and codon-optimized for *D. melanogaster*. **(B)** Mitotic chromosome squashes from larval brains

Figure 1 continued on next page

Figure 1 continued

homozygous for HOAP[*mel*]-Flag or HOAP[*yak*]-Flag stained with anti-Flag. (C) Mitotic chromosome squashes from larval brains homozygous for HA-HipHop, HOAP[*mel*]-Flag or HA-HipHop, HOAP[*yak*]-Flag stained with anti-HA.

|                                                   |                                                               | HMG Box                   |     |
|---------------------------------------------------|---------------------------------------------------------------|---------------------------|-----|
| mel                                               | MLLLLCVNMSGTQMSAFLRKYLADDEKKIRAQFKE                           | SDPNNKLILWMHEKTRITEEDLARP | 60  |
| yak                                               | -----MSGMQISSYLRKYLADDEKKIREEFKE                              | SDPNNEMILWMHEKTRITEEDLARP | 52  |
|                                                   | *** *: : ***** : *** ***** : *****                            |                           |     |
| mel                                               | YTEDEVKELCLRTKVKVDMTAWNCLWEAKKRFEAKGRFVNKSERFINRMYMKAVRRKMVQ  |                           | 120 |
| yak                                               | YTEDEVRELCLRTKVKVNMTAWNCLWEAKKRFDAGKGRFERKSEEFINLMYLKAVRRKMVQ |                           | 112 |
|                                                   | *****:*****:*****:*****:*****.***.*** **:*****                |                           |     |
| mel                                               | PYPEEFVAQRREIVAAETKKQNISRLDRWQKKKSQNLSAPESSPDAHASSNDAVQSHEDQ  |                           | 180 |
| yak                                               | PYPEDYVAQRREIAAAETKKDNISRLDRWQKQKRRNQSAHATQPDSDQN--EVVEIHDDT  |                           | 170 |
|                                                   | *****:*****.*****:*****:*****: * : * * * :. *: : . : *: *: *  |                           |     |
| mel                                               | ANTNLSSLSQMNQVEAMAPPGVSSSDLSGIGDDEDEQQQS-----GFQDENINRPE      |                           | 232 |
| yak                                               | NRYS-----VSQAVALPVLTPSDLSGIGDDEDEQQQHHHKKHRSQFQNEHADCP-       |                           | 220 |
|                                                   | . . :*: * :*: *****. *****: *: *: : *                         |                           |     |
| mel                                               | TEINENSVRCDPINLGRMRTGCINSQANNSFRNTESDPDYMFQTLSTLVRPTSTQEPD    |                           | 292 |
| yak                                               | ----ETQMRCDQADSGRLPNGP-----TNSESDPDYMFQTLRSRISQPTSTQEAD       |                           | 267 |
|                                                   | *..:*** : **: .* *:*****:*****:***** *                        |                           |     |
| mel                                               | DQVNCPETEMNESWVRCDQINSESLSIGPSIDSEGTITFQNTSEPIDVTSIA          |                           | 345 |
| yak                                               | DQLACPETEMNESWVRCDQINSESMSIGPSINSDGSISFQNSGSEPIDVDN--         |                           | 318 |
|                                                   | **:*:*****:*****:*****:*****:*****                            |                           |     |
| C-terminal region necessary<br>for end-protection |                                                               |                           |     |

**Figure 1—figure supplement 1.** Amino acid alignment of HOAP[mel] and HOAP[yak]. The two proteins share less than 75% amino acid identity and even less when indels are taken into account. The only identifiable domain is the N-terminal HMG-box. The dashed box represents the missing sequence from the truncation mutant described in *Cenci et al., 2003*.

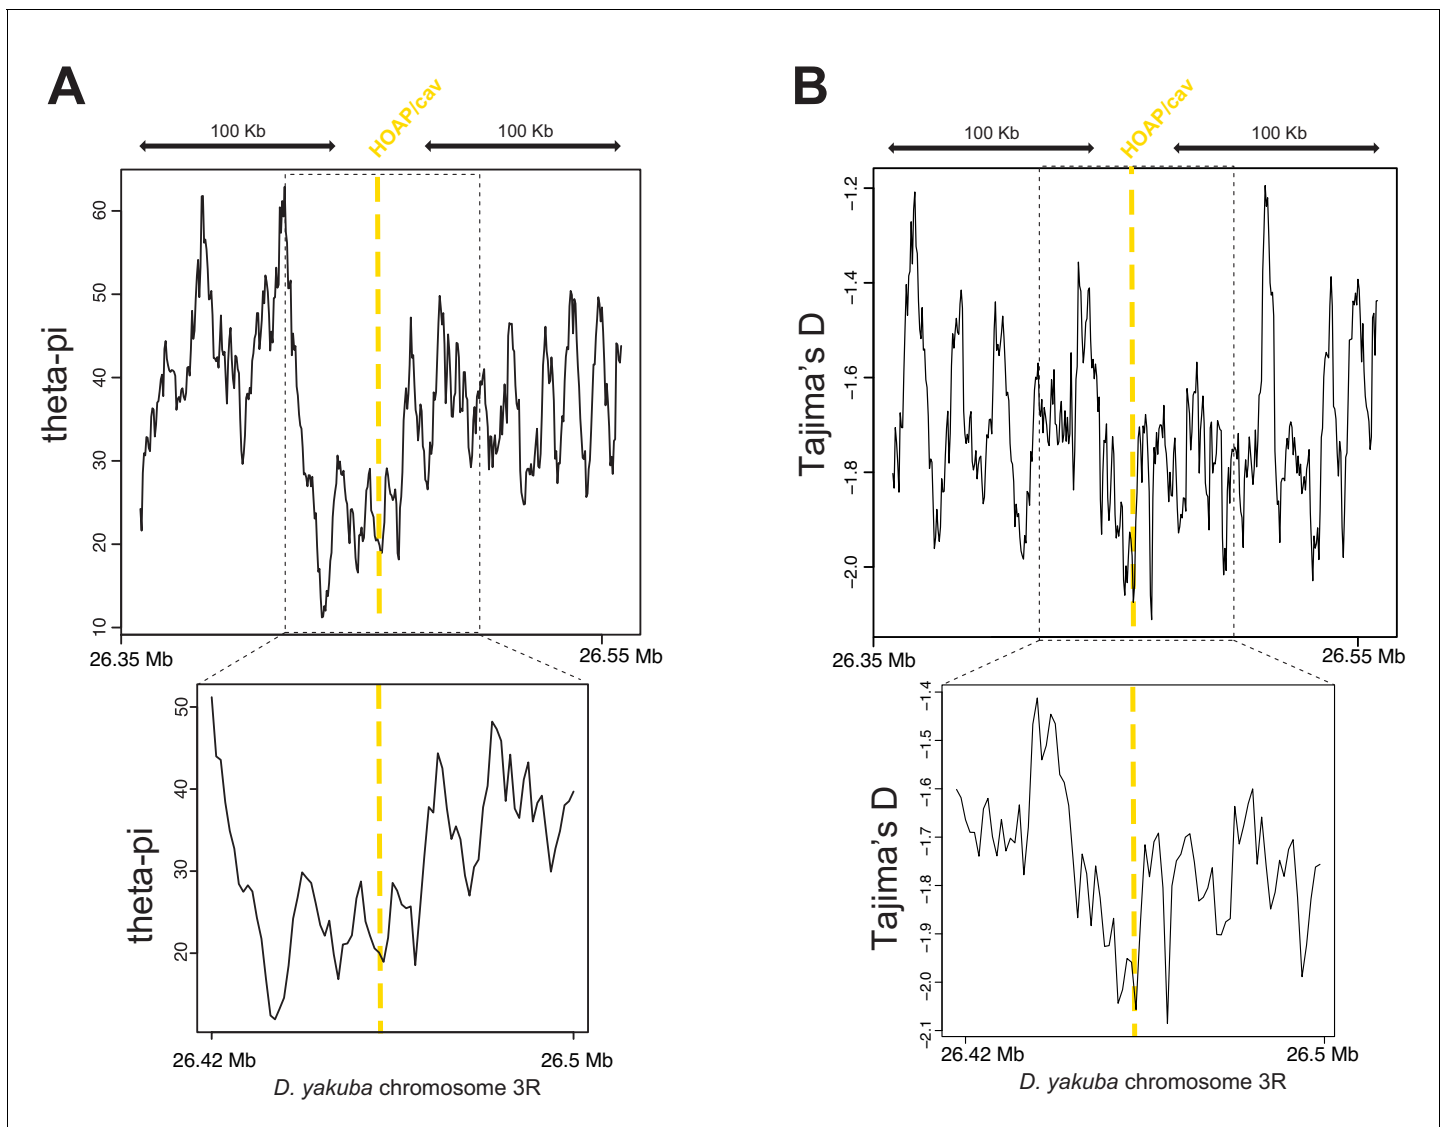

**Figure 1—figure supplement 2.** Valley of heterozygosity around the *cav* locus in *D. yakuba*. Parameter estimates from *Rogers et al., 2015* centered around the *cav* locus. Theta-pi (A) and Tajima's D (B) calculated from 20 *D. yakuba* alleles across 5kb windows sliding 500bp along 200kb (top) and 100kb (bottom).

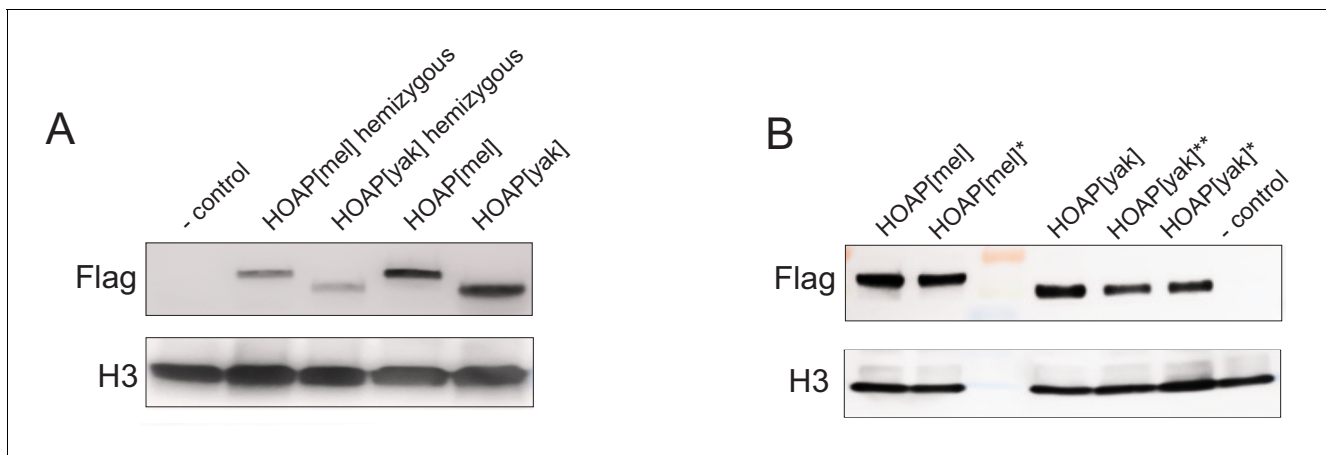

**Figure 1—figure supplement 3.** Western Blots of ovaries probed with anti-H3 (control) and anti-Flag to detect Flag-tagged HOAP. (A) Ovaries hemizygous or homozygous for the transgenes (B) ‘\*’ Ovaries from homozygous genotypes used in replicated experimental evolution, ‘\*\*\*’ genotype not included in downstream experiments.

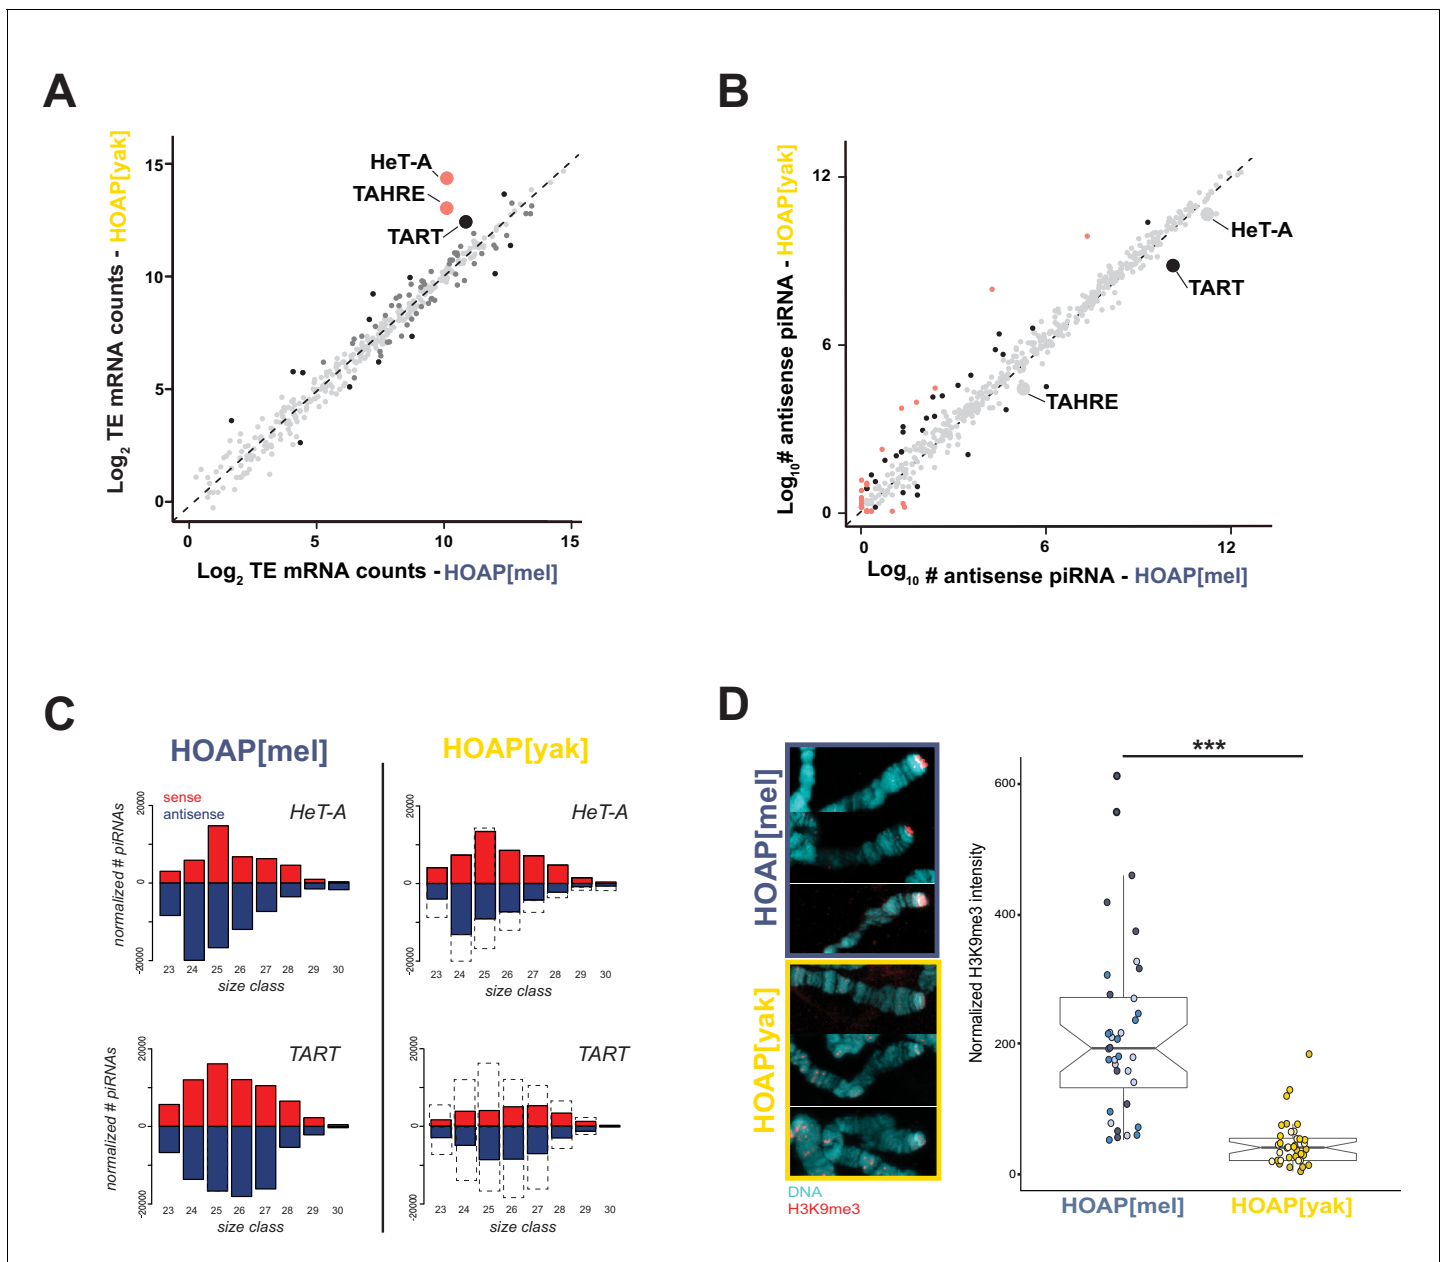

**Figure 2.** HOAP[yak] fails to rescue telomeric retrotransposon silencing and telomeric silent chromatin. (A) Normalized read counts from RNA-seq on HOAP[mel] and HOAP[yak] ovaries (three pooled ovary replicates per genotype) mapped to *D. melanogaster* transposon families. Dark gray circles: adjusted p-value < 0.01, log<sub>2</sub> FC < 1, Black circles: adjusted p-value < 0.01, log<sub>2</sub> FC > 1, Salmon circles: adjusted p-value < 0.01, log<sub>2</sub> FC > 2. (B) Normalized read counts from small RNA-seq on HOAP[mel] and HOAP[yak] ovaries (three pooled ovary replicates per genotype) mapped to transposon families. Black circles: adjusted p-value < 0.01, log<sub>2</sub> FC > 1, Salmon circles: adjusted p-value < 0.01, log<sub>2</sub> FC > 2. (C) Length histogram of HeT-A- and TART-mapping sense (red) and antisense (blue) piRNAs recovered from HOAP[mel] and HOAP[yak] ovaries. Dotted box highlights depletion of piRNAs in HOAP[yak]. (D) Representative images of giant polytene chromosome X tips stained with anti-H3K9me3 (left) and plot of H3K9me3 signal quantification (right, \*\*\*: p-value < 0.0001). Different shades of blue (HOAP[mel]) or yellow/orange (HOAP[yak]) correspond to different individuals (three individuals per genotype).

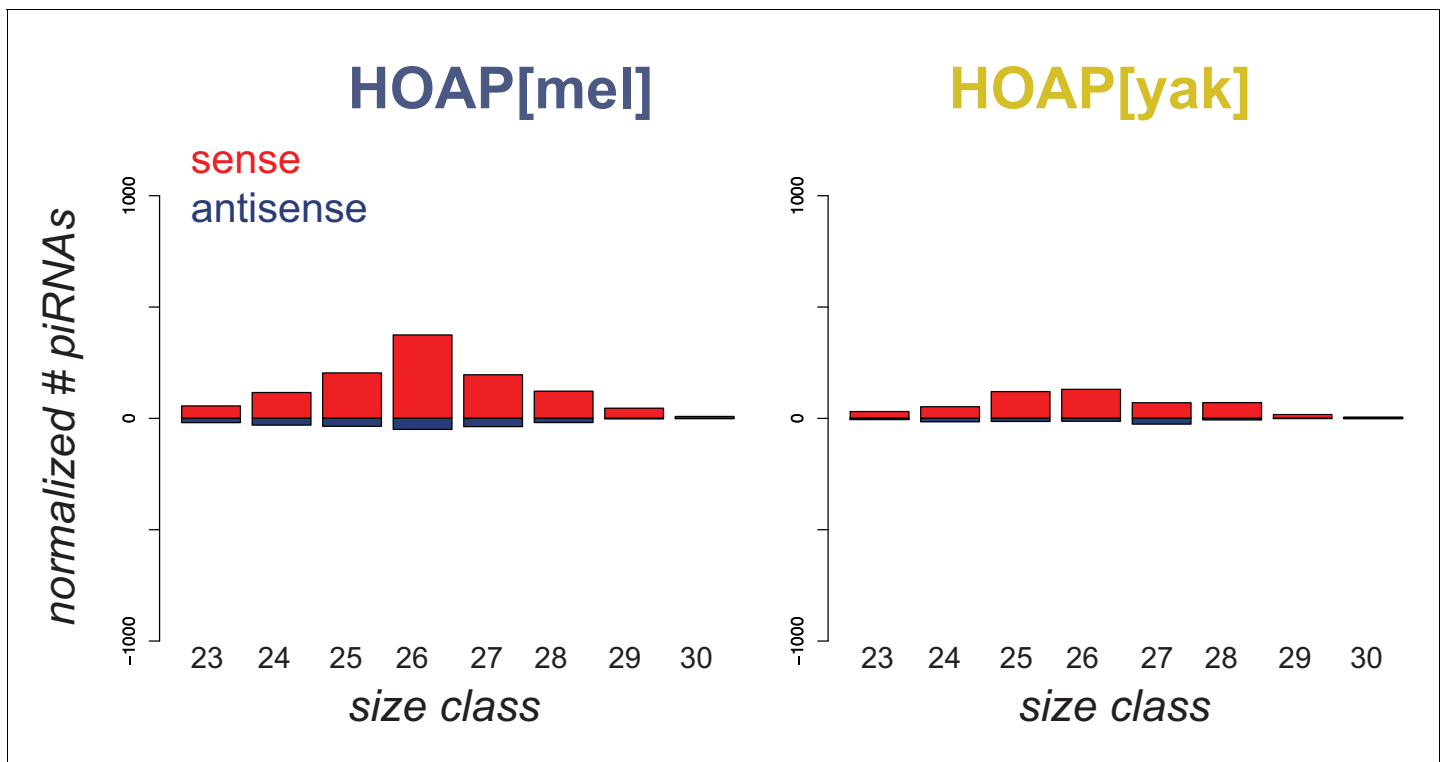

**Figure 2—figure supplement 1.** Number of piRNAs that map to the TAHRE consensus. Length histogram of sense piRNAs (red) and antisense piRNAs (blue) mapped to the TAHRE telomeric retrotransposon. The y-axis shows levels of piRNAs (normalized by total miRNAs) and x-axis shows the length (nt) of piRNAs.



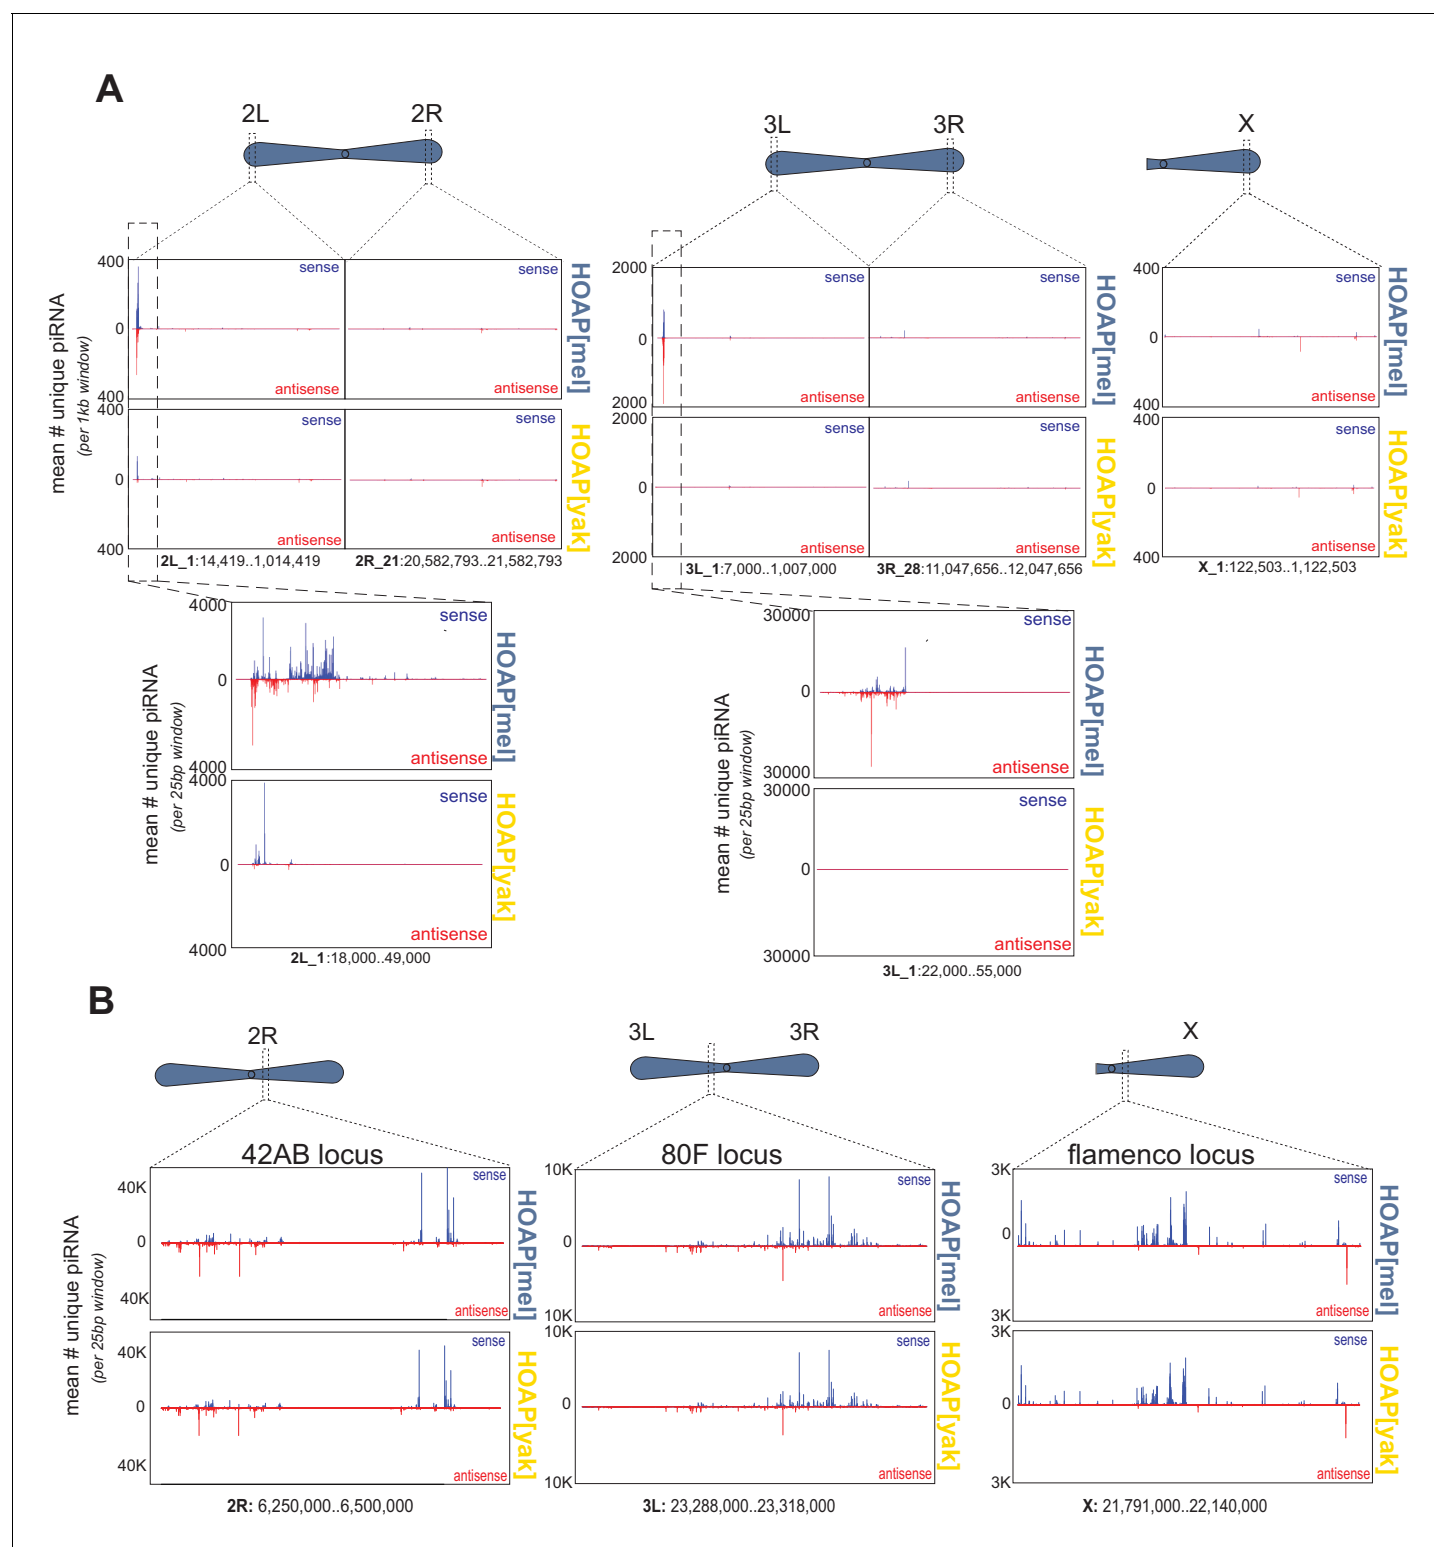

**Figure 2—figure supplement 2.** Number of uniquely mapping piRNAs (y-axis) detected across different chromosome locations (x-axis). (A) Subtelomere clusters (defined as 1Mb proximal to the most proximal telomeric retrotransposon) along the long-read assembly described in *Chang and Larracuent*, 2019. We detected the same pattern when mapping piRNAs to the “A7” long-read assembly (NCBI assembly ASM340191v1, *Chakraborty et al.*, 2019, data not shown). (B) Well-characterized piRNA clusters embedded at heterochromatin-euchromatin borders (*Dmel* r6.23). For all plots, HOAP[meI] is above and HOAP[yak] is below.

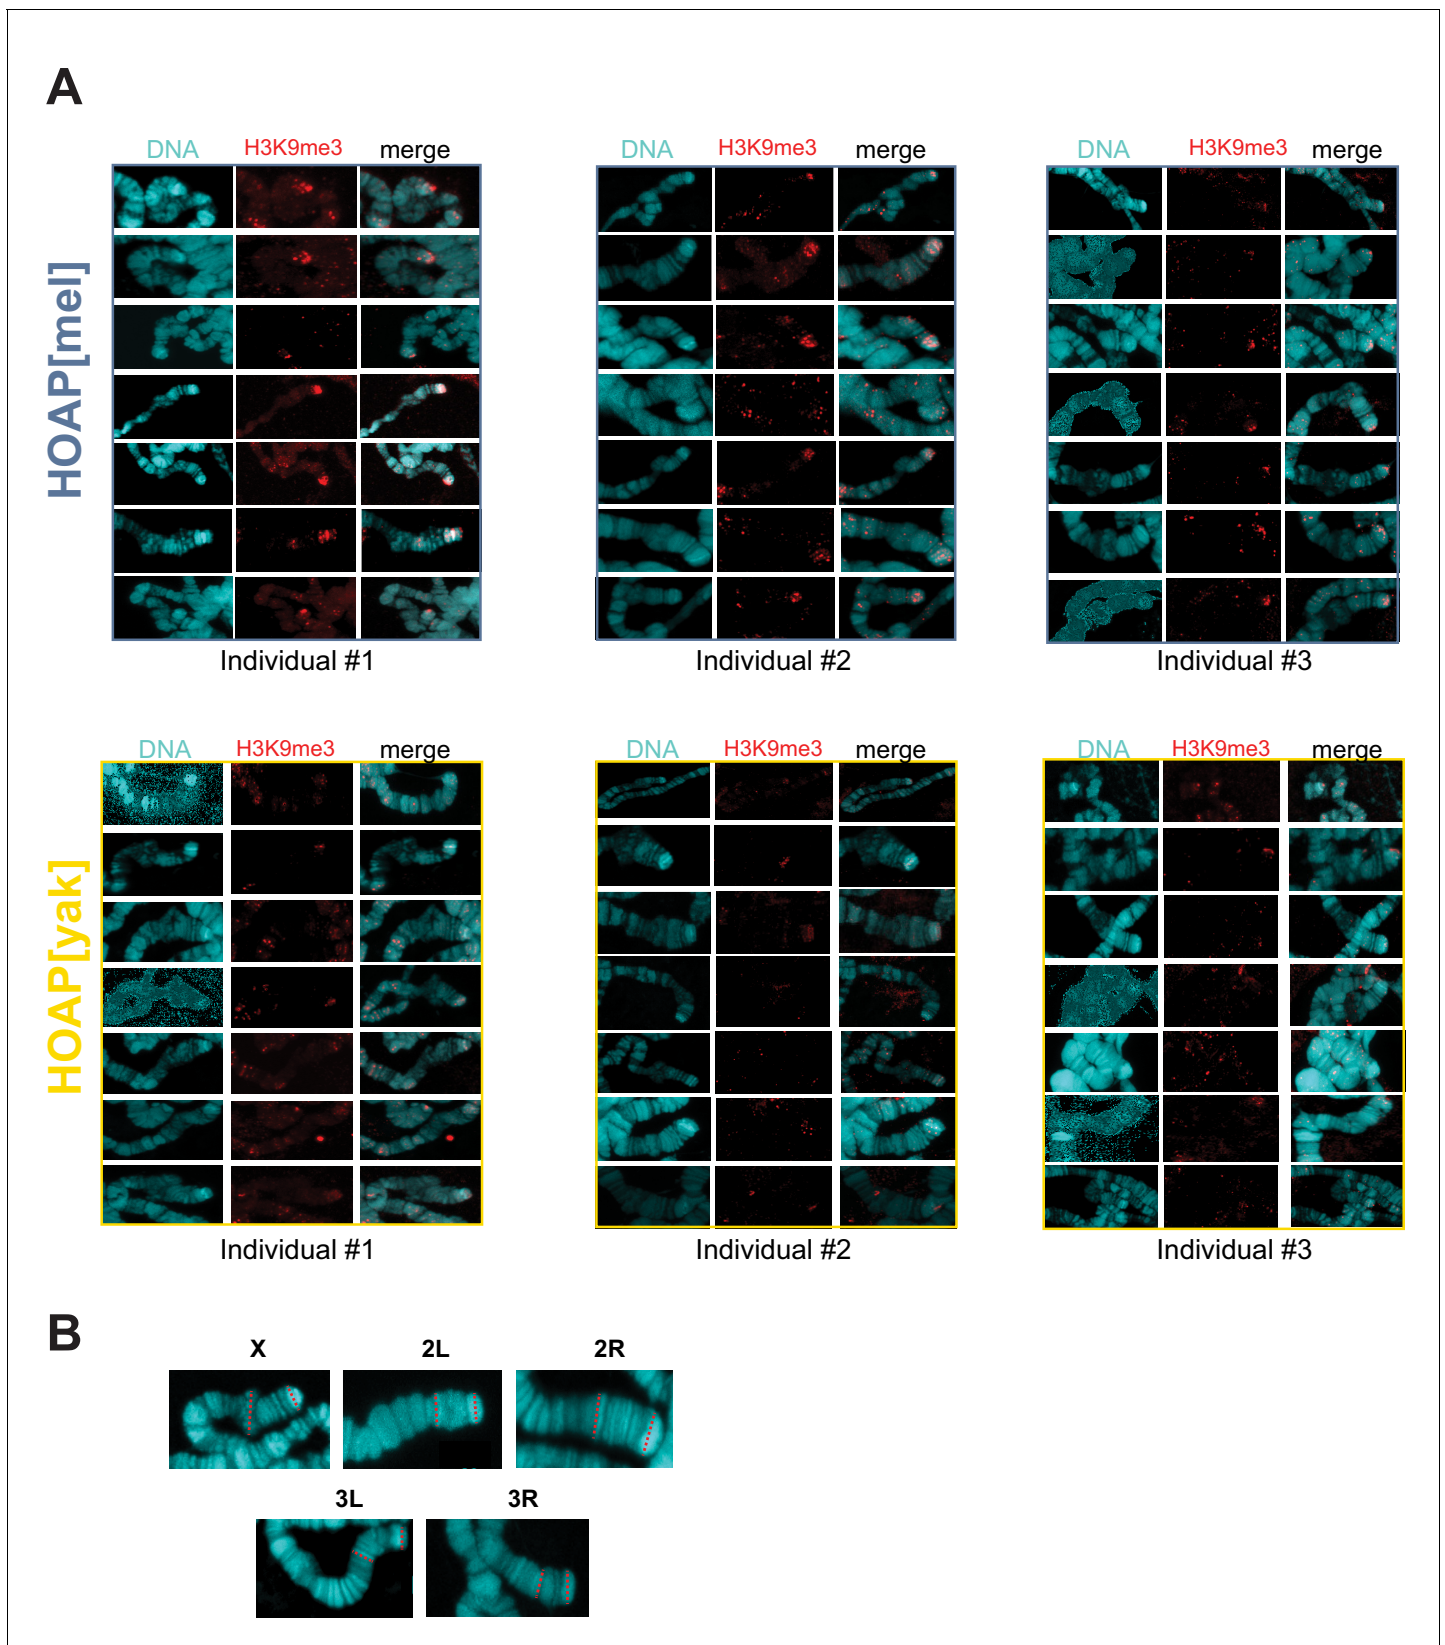

**Figure 2—figure supplement 3.** Additional representative images of H3K9me3 signal on chromosome X and strategy for normalization. (A) Representative images of anti-H3K9me3 staining on polytene chromosome squashes from HOAP[me] and HOAP[yak]. (B) For each chromosome tip, Figure 2—figure supplement 3 continued on next page

*Figure 2—figure supplement 3 continued*

we measured the lengths of two fixed chromosome bands (red dotted lines). We divided the H3K9me3 signal area by the geometric mean of these two bands to calculate a normalized signal.

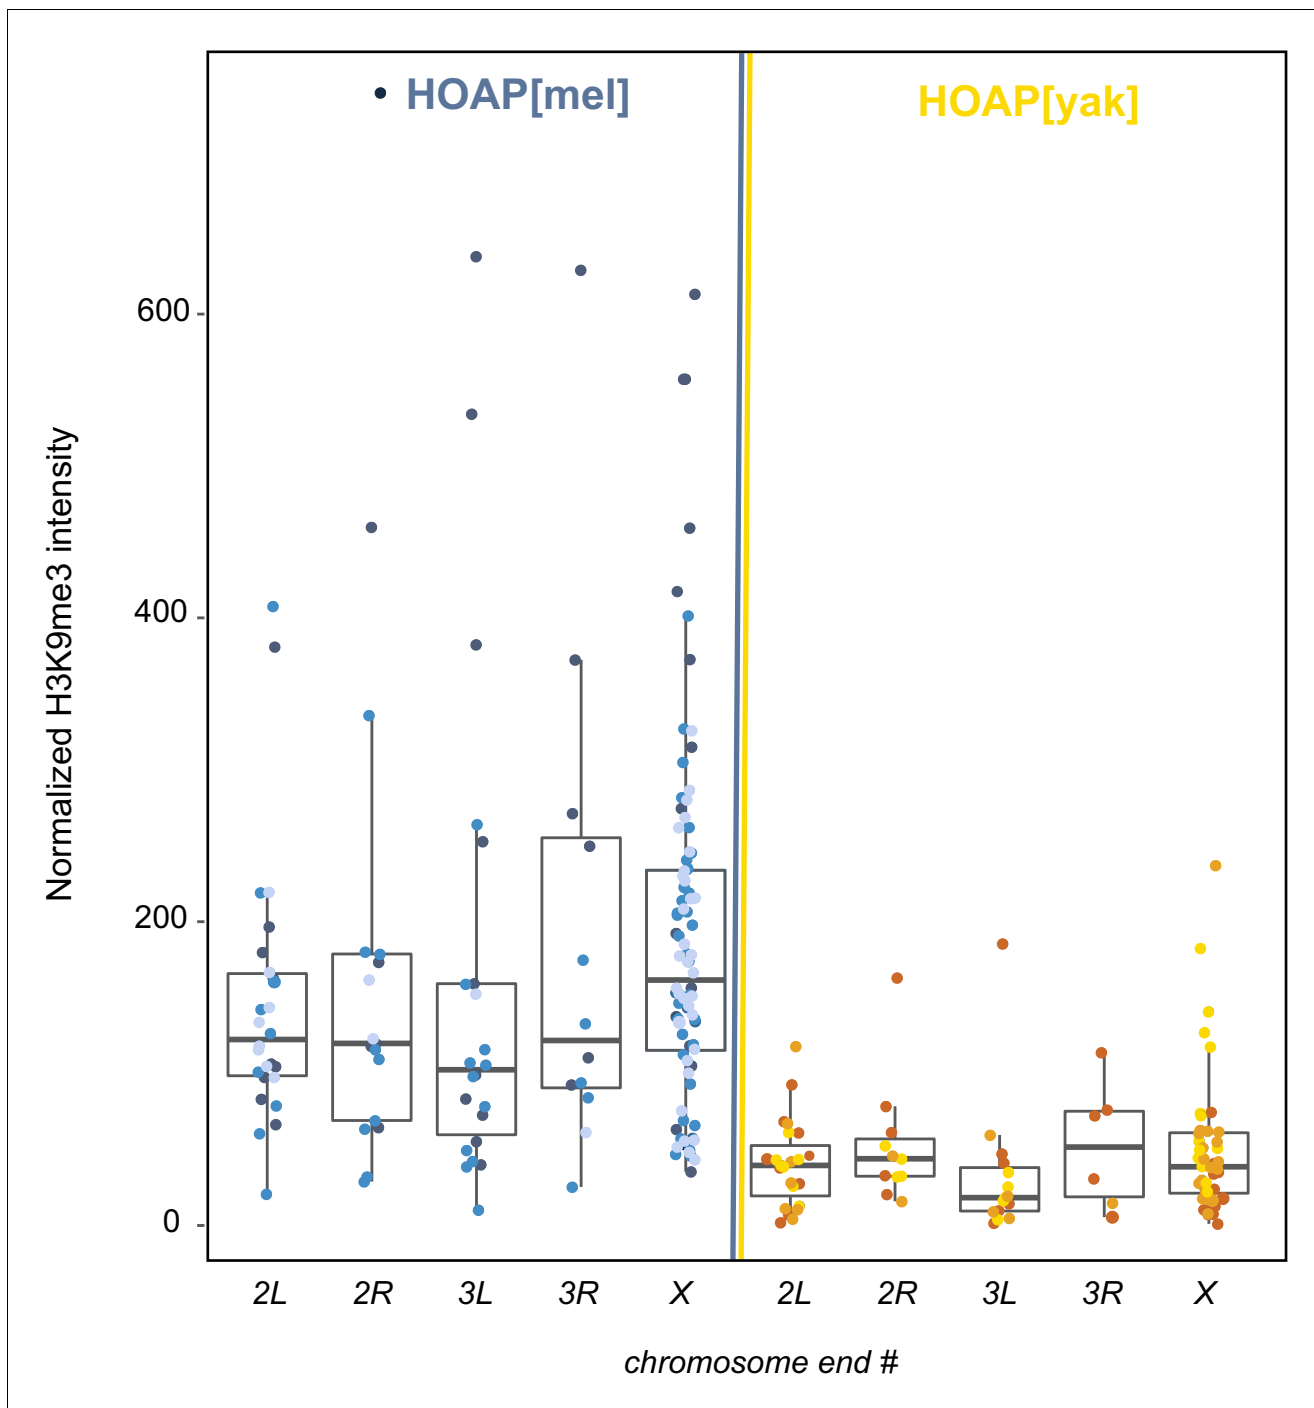

**Figure 2—figure supplement 4.** Quantification of H3K9me3 signal at five chromosome tips. H3K9me3 signal (y-axis) from giant polytene chromosome squashes of HOAP[mel] and HOAP[yak] across chromosome ends (x-axis). Three different shades of blue correspond to three different HOAP[mel] individuals from which we dissected salivary glands. For HOAP[yak], different individuals are shown in yellow/orange shades. Mann Whitney U test: 2L p-value =  $4.94 \times 10^{-9}$ , 2R: p-value = 0.002, 3L: p-value =  $1.9 \times 10^{-5}$ , 3R: p-value = 0.018, X: p-value =  $1.15 \times 10^{-14}$ .

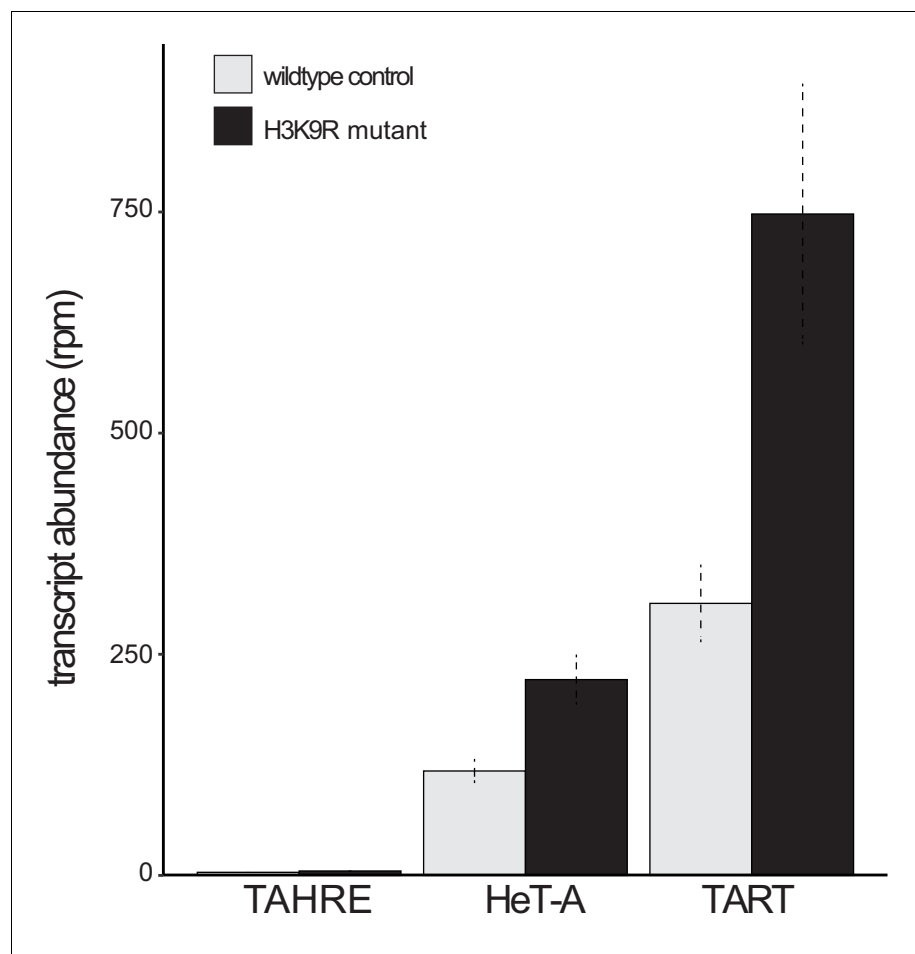

**Figure 2—figure supplement 5.** Telomeric retrotransposon transcript abundance in wildtype versus 'H3K9R' mutant wing discs. Analysis of RNA-seq data reported in *Penke et al., 2016* in wildtype versus H3K9R mutants that lack H3K9me3 genome-wide. The H3K9R mutant has elevated HeT-A and TART retrotransposon transcripts. Reads per million (rpm) reported with standard error across three replicates.

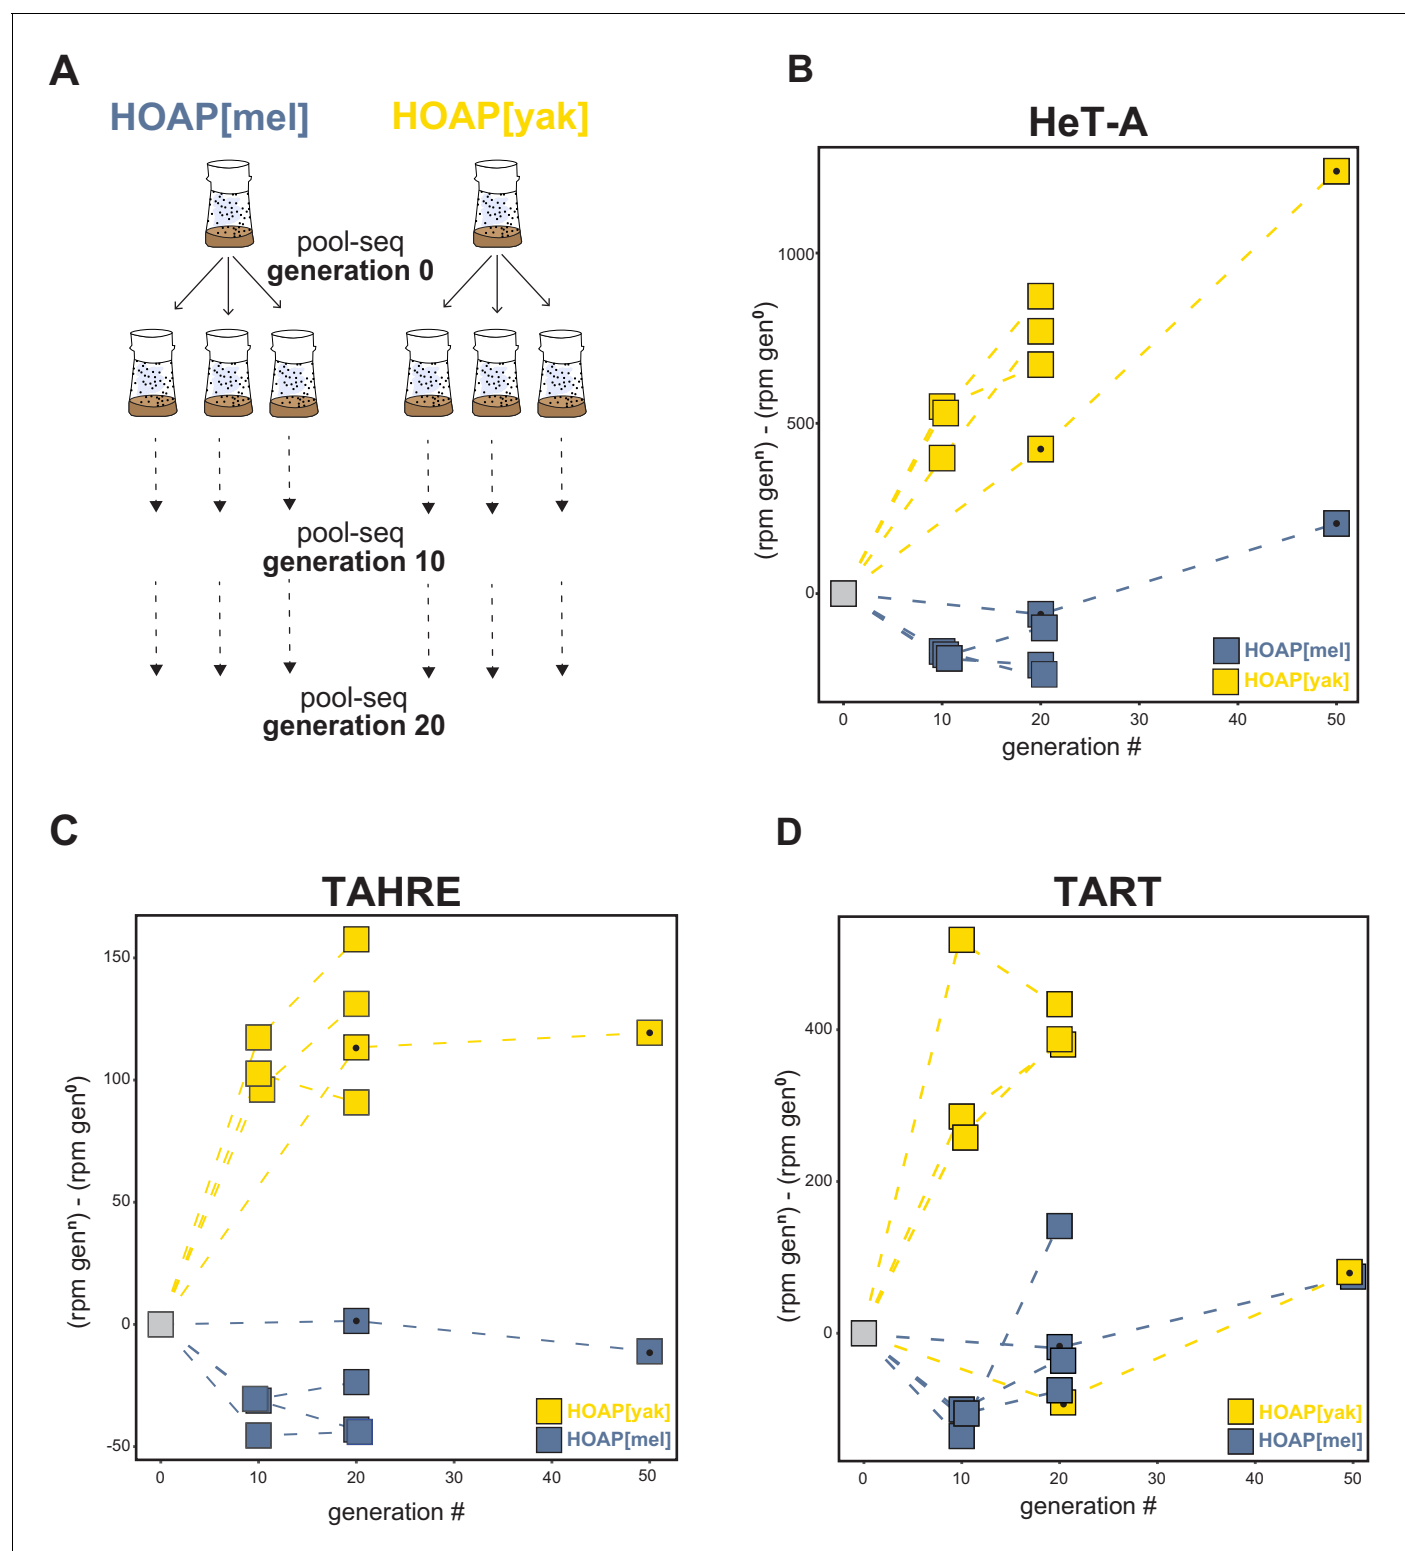

**Figure 3.** Retrotransposons proliferate in HOAP[yak] over experimental evolution. **(A)** Replicated experimental evolution strategy that begins with an expanded population of HOAP[mel] and HOAP[yak]. We divided each founder population into three replicates and then froze down 100 females for pool-DNA-seq ('generation 0'). We flipped replicate populations until generation 20, sampling pools of females for DNA-seq at generations 10 and 20 per population. A parallel run of experimental evolution (not shown) was sampled at generations 0, 20, and 50. **(B-D)** DNA-seq reads mapped to the *D. melanogaster* HeT-A **(B)**, TAHRE **(C)**, and TART **(D)** consensus sequences, shown as reads per million (rpm) at a given generation minus the rpm at generation 0 for a given population. The long-term experimental evolution samples have a filled black circle in each square. Note the different y-axes of **(B)**, **(C)**, and **(D)**.

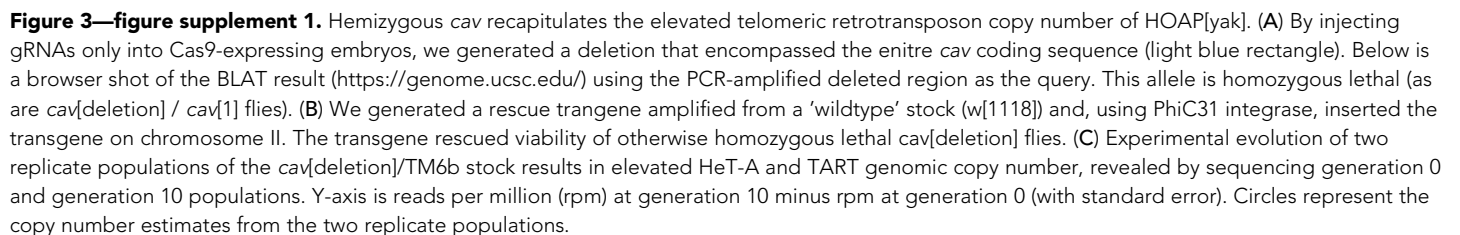

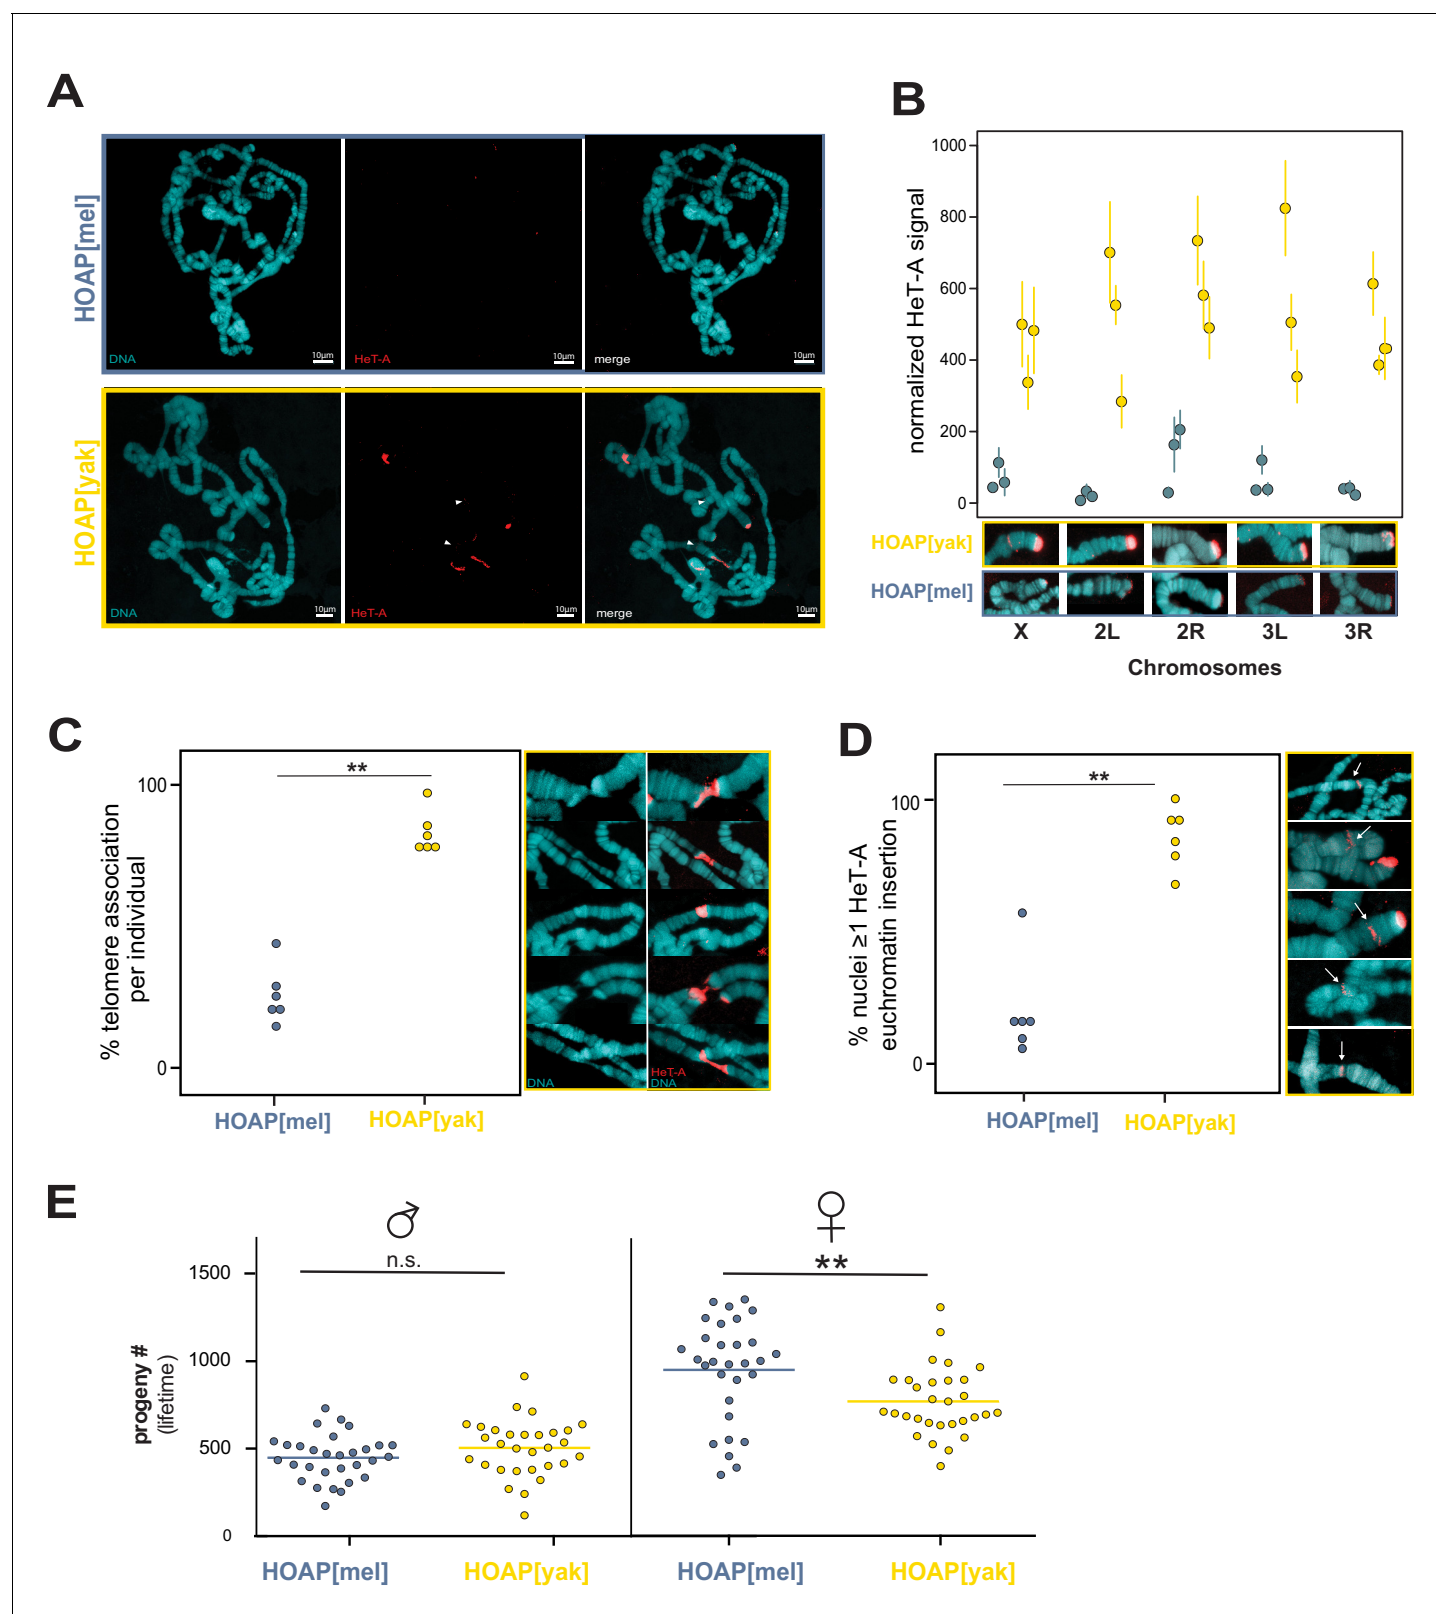

**Figure 4.** Retrotransposons proliferate in HOAP[yak] at both telomeric and non-telomeric locations and are associated with a fitness cost. (A) HeT-A FISH probe (red) hybridized to giant polytene chromosomes that were dissected from generation 50 HOAP[mel] and HOAP[yak] salivary glands. (B) HeT-A signal at chromosome ends at generation 50 HOAP[mel] and generation 50 HOAP[yak] (at least 10 tips per chromosome tip per individual, three individuals). (C) Telomere-telomere association frequency (\*\* $p$ -value < 0.005) and (D) non-telomeric HeT-A band frequency across generation 50

Figure 4 continued on next page



Figure 4 continued

HOAP[mel] and HOAP[yak] ('\*\*': p-value < 0.005). Percent nuclei calculated from at least 10 nuclei across six replicate individuals per genotype. (E) Lifetime male fertility (left) and female fertility (right), n = 30, '\*\*': p-value < 0.005.

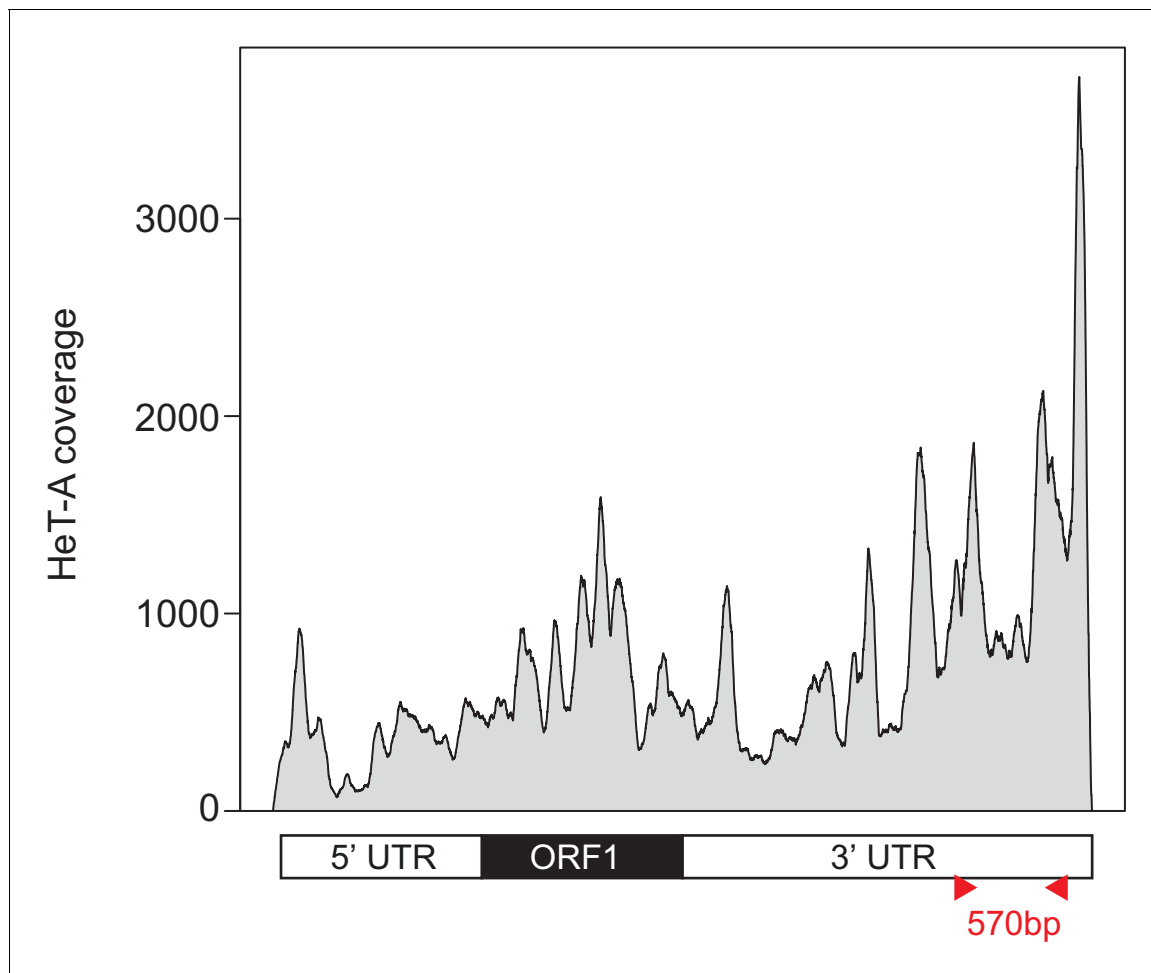

**Figure 4—figure supplement 1.** Strategy for HeT-A FISH probe design. Genome coverage plotted along the HeT-A consensus sequence from the pool-seq data. The HeT-A probe corresponds to the most abundant region. Probe primers (**Supplementary file 4**) are depicted with red arrowheads.

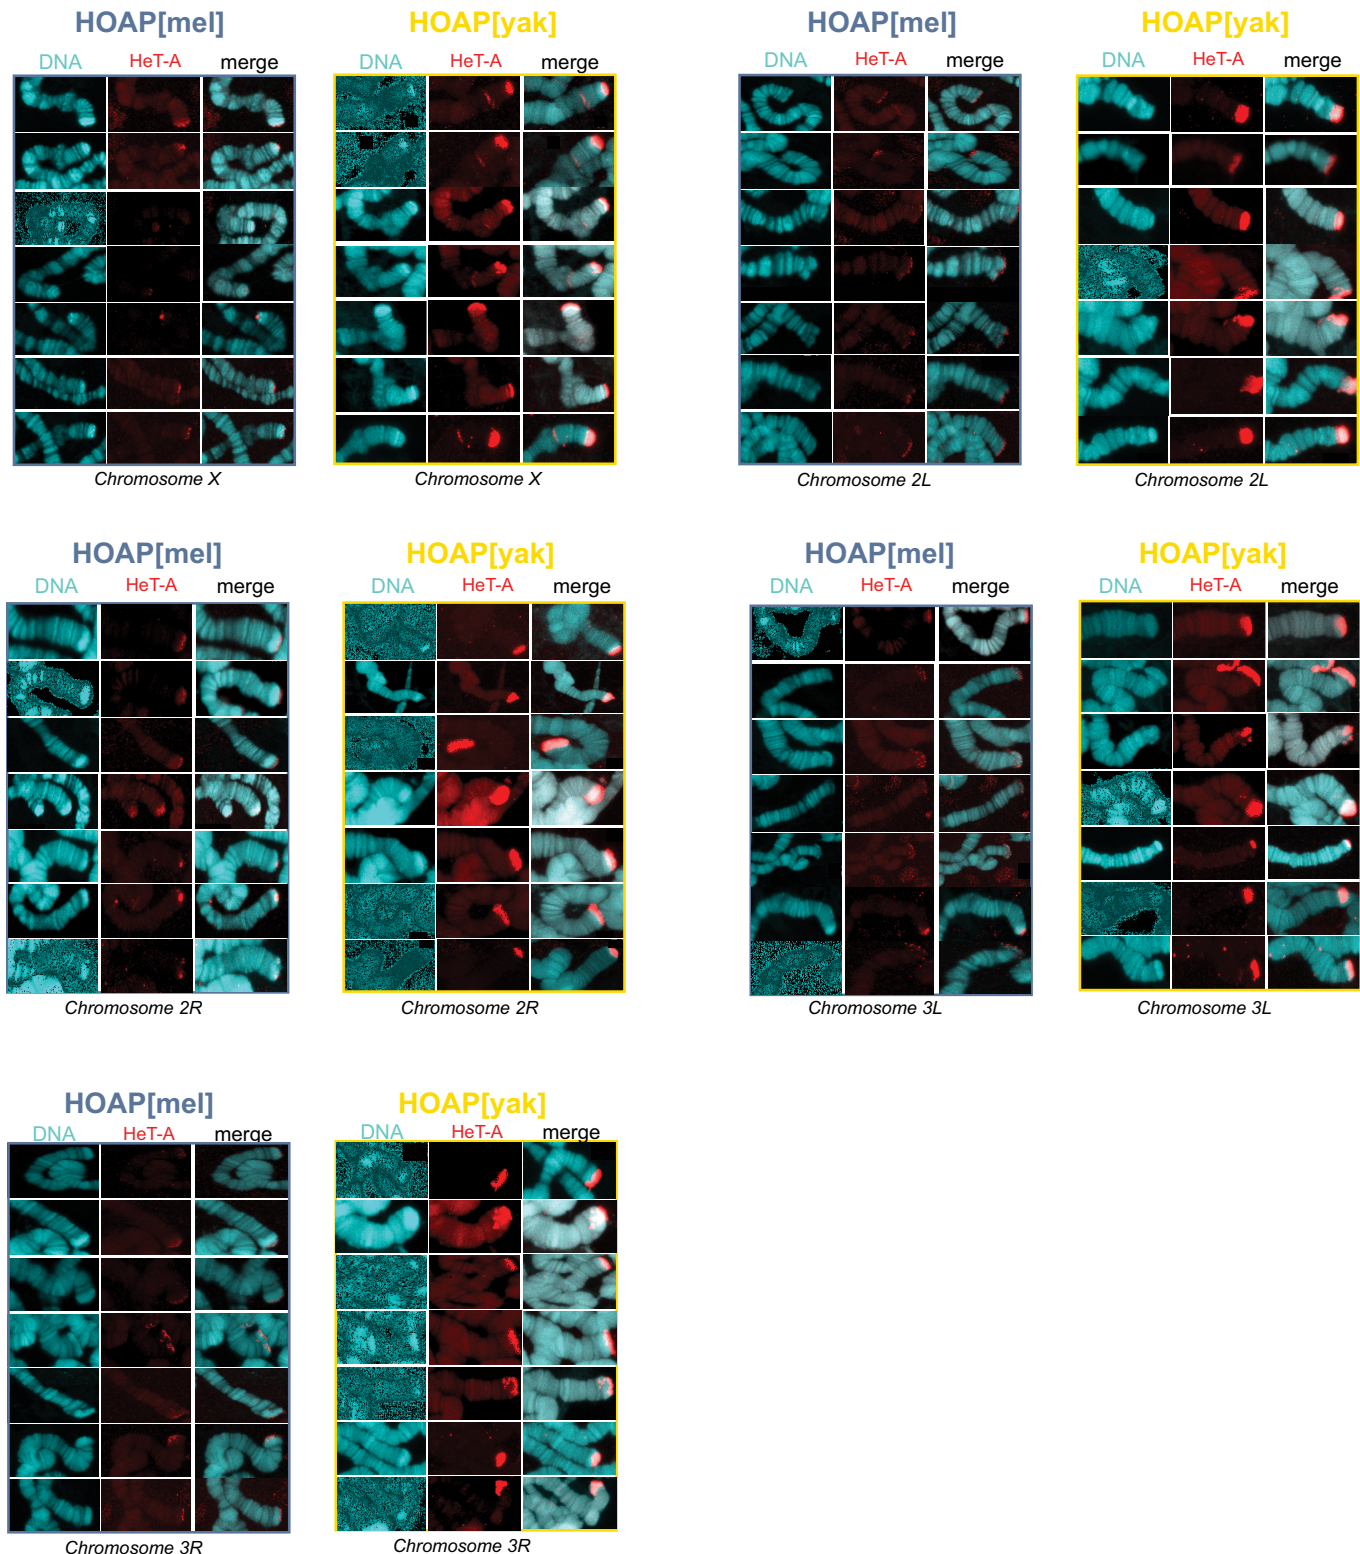

**Figure 4—figure supplement 2.** Additional representative images of HeT-A signal on polytene chromosomes. Representative images of HeT-A FISH signal on polytene chromosome squashes from generation 50 HOAP[mel] and HOAP[yak] across defined chromosome tips.

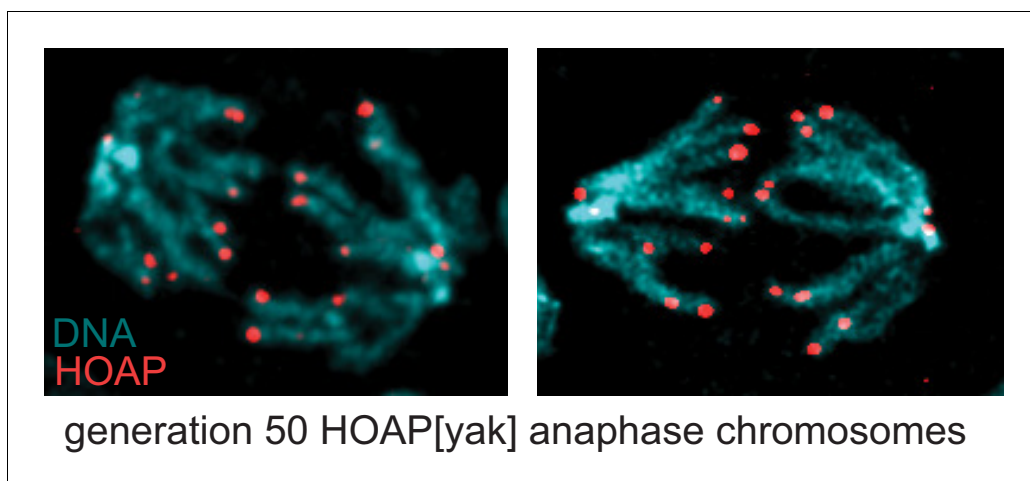

**Figure 4—figure supplement 3.** No evidence that telomere associations are telomere fusions in the evolved HOAP[yak] genotype. Two representative images of anaphase chromosomes from larval brains of generation 50 HOAP[yak]-Flag stained with anti-Flag and DAPI. Telomere fusions would appear as chromatin bridges.

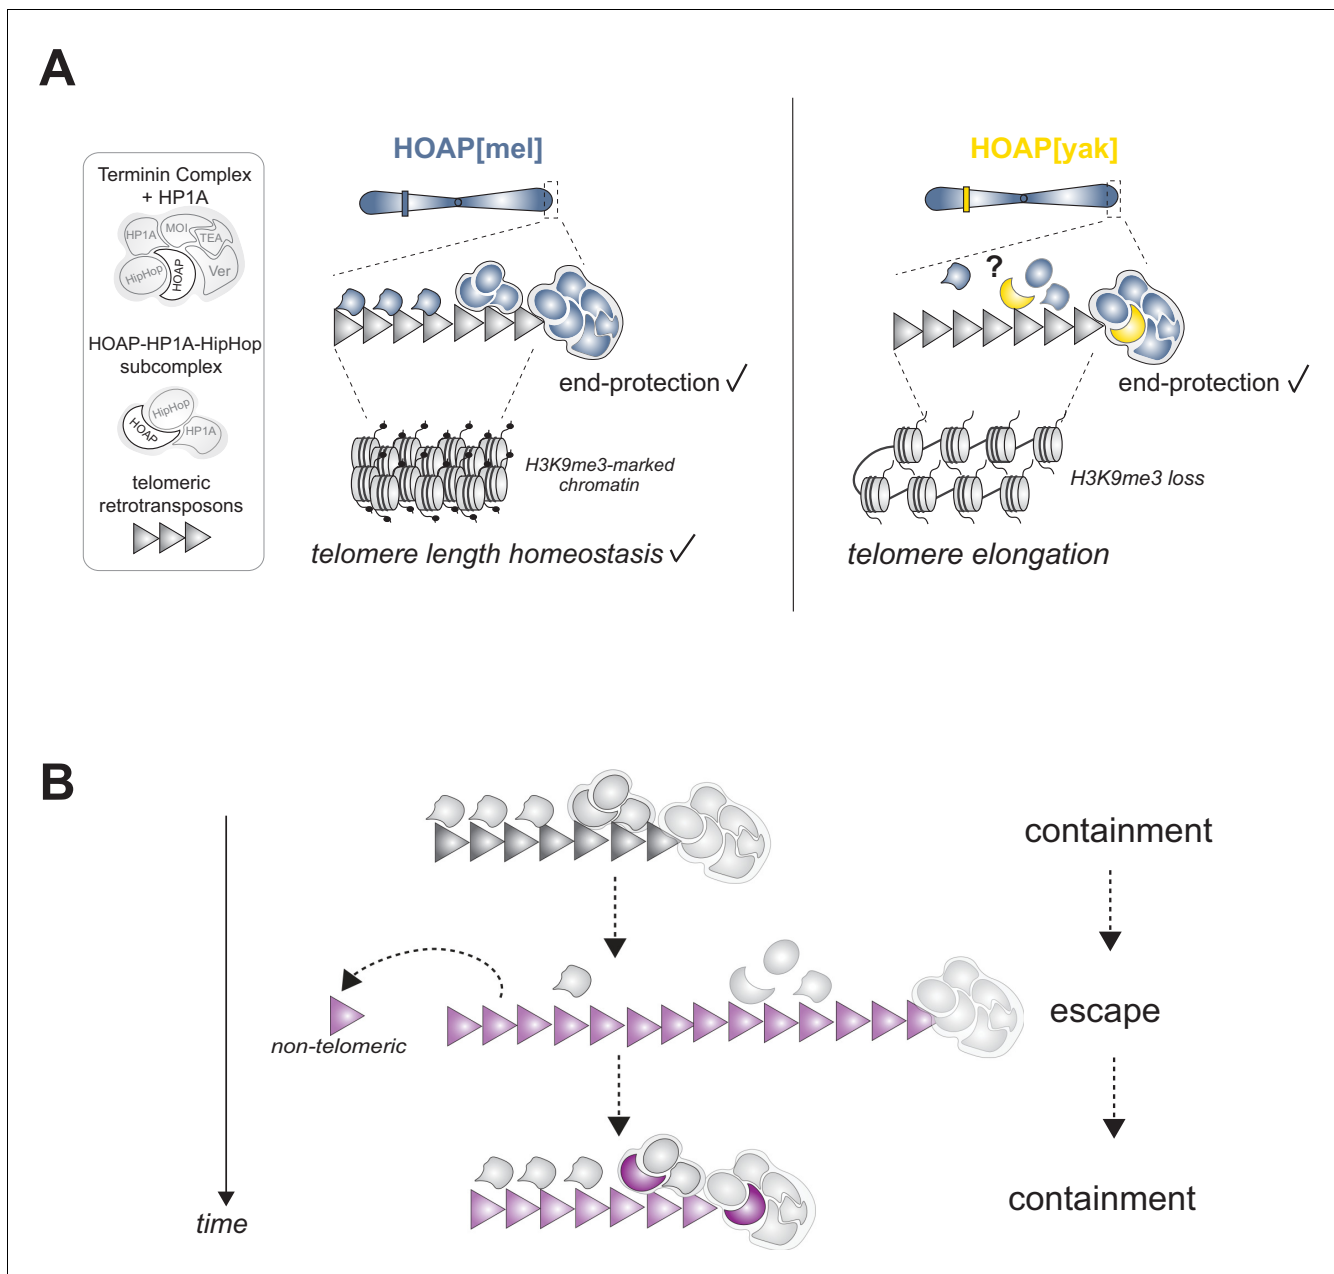

**Figure 5.** Model of HOAP[yak] separation-of-function and model of intra-genomic conflict between host telomere proteins and selfish telomeric retrotransposons. (A) In the presence of the *D. yakuba* version of HOAP (yellow moon), *D. melanogaster* telomeres maintain telomere end-protection but lose telomeric retrotransposon silencing and length regulation. We hypothesize that the two defined HOAP functions separate across two multi-protein complexes: HOAP[yak] supports Terminin integrity but disrupts the HOAP-HP1A-HipHop subcomplex. (B) Model of intra-genomic conflict shaping HOAP evolution and telomeric retrotransposon evolution. At some timepoint in the past (e.g. along the lineage leading to *D. melanogaster*), ancestral host telomere proteins successfully contain telomeric retrotransposons ('containment'). Over time, the retrotransposon innovates (gray triangle becomes purple), elongating chromosomes and inserting into non-telomeric locations ('escape'). Fitness costs incurred by the host spurs telomere protein evolution (gray moon becomes a purple moon), restoring control over telomeric retrotransposons ('containment').

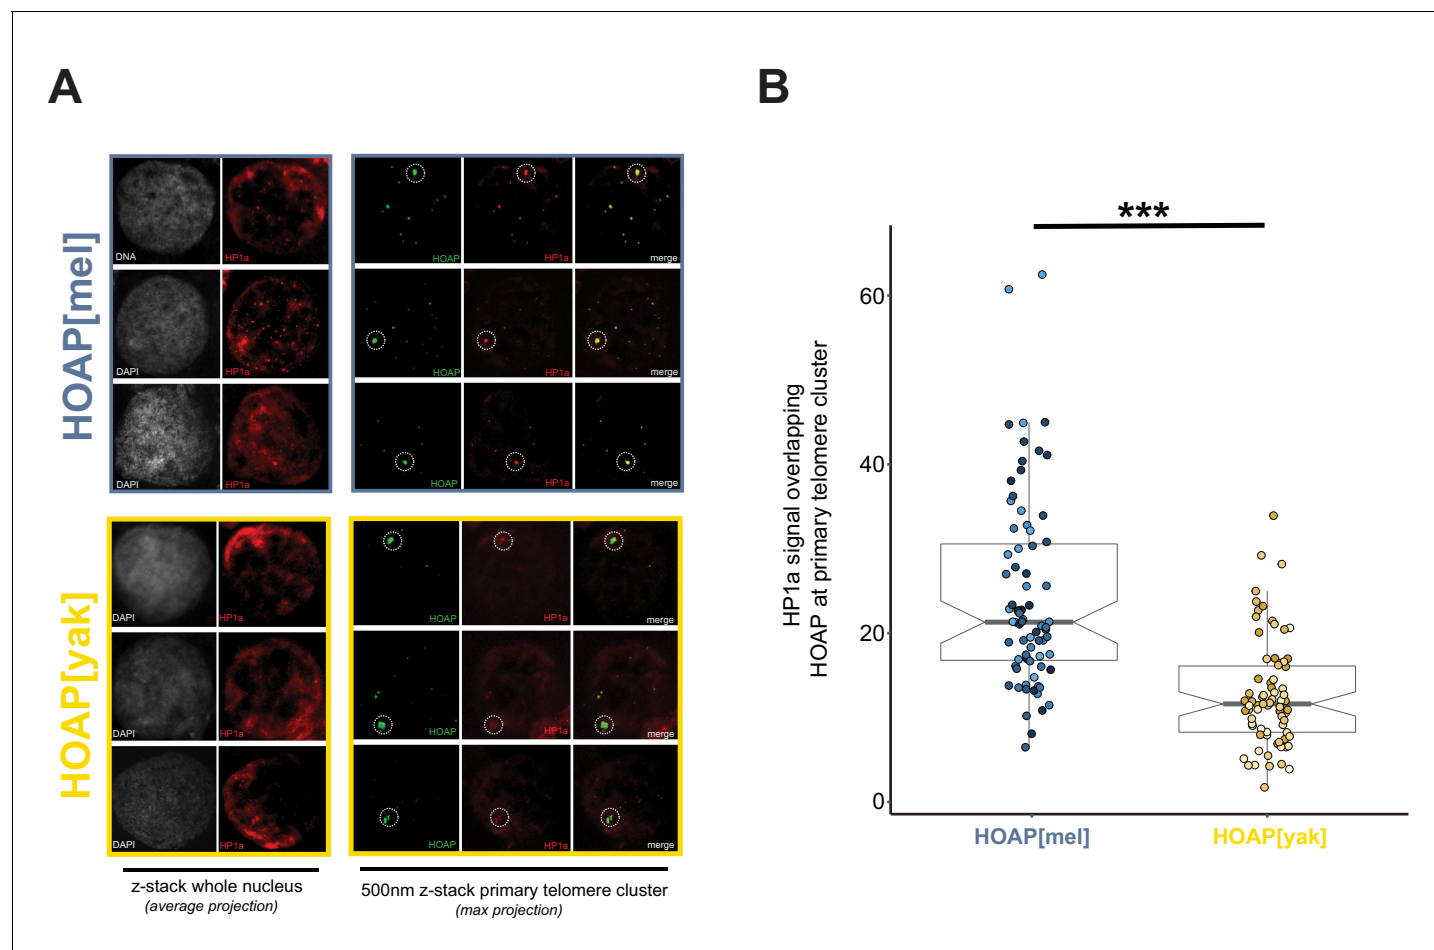

**Figure 5—figure supplement 1.** Reduced HP1a signal at the primary HOAP[yak]-marked telomere cluster in ovarian nurse cells. **(A)** Representative images of DNA (white) and HP1a (red) across whole nuclei (left) and HOAP (detected by anti-Flag, green) and HP1a (red) at the primary cluster of telomeres within each nurse cell (right). Dotted circles correspond to the region of interest (ROI) for quantification. **(B)** Quantification of mean HP1 intensity across HOAP[mel] and HOAP[yak] of 75 nurse cells across 15 individuals (\*\*\*\* = p-value < 0.0001).

[illegible]

**Figure 5—figure supplement 2.** Protein alignment of HeT-A Gag consensus from *D.melanogaster* and *D.yakuba*. The two Gag domains share 72% amino acid identity.
