# Supplementary material for: Adaptive evolution of an essential telomere protein restricts telomeric retrotransposons
Source: eLife. 2020 Dec 22;9:e60987. doi: 10.7554/eLife.60987 (PMC7755394; doi:10.7554/eLife.60987)
Supplement: Supplementary file 1. [file elife-60987-supp1.xlsx]

## Sheet: Sheet1
Supplementary File 1. Alleles of cav/HOAP extracted from publicly available genome assemblies of either D. melanogaster (single allele) or D. yakuba (a population sample), aligned with gaps removed for McDonald-Kreitman test.
species	gene	nucleotide_sequence
D. melanogaster	HOAP_from_r6.23	ATGTCGGGGACGCAAATGTCTGCCTTCCTGAGAAAGTATCTAGCCGACGAGGACAAAAAAATTCGTGCGCAATTCAAAGAAAGCGATCCTAACAACAAATTGATTCTATGGATGCACGAAAAAACGAGAATAACCGAGGAGGACTTGGCACGCCCATACACCGAGGACGAGGTAAAGGAGCTTTGTCTACGCACCAAAGTGAAGGTTGATATGACCGCTTGGAATTGTCTGTGGGAAGCCAAAAAGAGGTTTGAAGCAAAAGGACGTTTTGTGAACAAGTCTGAGAGATTCATCAACCGAATGTATATGAAAGCGGTGCGCAGAAAGATGGTCCAACCGTATCCGGAGGAGTTTGTGGCCCAGCGAAGAGAAATAGTTGCAGCCGAGACTAAGAAGCAG…
D.yakuba	HOAP_from_r1.04	ATGTCTGGAATGCAAATATCTAGCTACCTGAGGAAGTATCTAGCCGATGAGGACAAAAAAATACGAGAGGAATTCAAAGAAAGCGATCCTAATAACGAAATGATTCTATGGATGCACGAAAAAACGAGAATAACCGAGGAGGACTTGGCGCGCCCATACACCGAGGACGAAGTAAGGGAGCTGTGTTTACGCACCAAAGTAAAAGTCAATATGACTGCTTGGAATTGCTTGTGGGAAGCCAAAAAGAGATTTGATGCAAAAGGACGTTTTGAAAGAAAGTCCGAGGAATTTATCAACCTAATGTATTTGAAAGCGGTGCGCAGGAAGATGGTCCAACCGTATCCGGAGGACTATGTGGCCCAGCGAAGAGAAATTGCTGCCGCGGAGACCAAGAAGGAC…
D.yakuba	HOAP_from_SRR1014734	ATGTCTGGAATGCAAATATCTAGCTACCTTAGGAAGTATCTAGCCGATGAGGACAAAAAAATACGAGAGGAATTCAAAGAAAGCGATCCTAATAACGAAATGATTCTATGGATGCACGAAAAAACGAGAATAACCGAGGAGGACTTGGCGCGCCCATACACCGAGGACGAAGTAAGGGAGCTGTGTTTACGCACCAAAGTAAAAGTCAATATGACCGCTTGGAATTGCTTGTGGGAAGCCAAAAAGAGATTTGATGCAAAAGGACGTTTTGAAAGGAAGTCCGAGGAATTTATCAACCTAATGTATTTGAAAGCGGTGCGCAGGAAGATGGTCCAACCGTATCCGGAGGACTATGTGGCCCAGCGAAGAGAAATTGCTGCCGCGGAGACCAAGAAGGAC…
D.yakuba	HOAP_from_SRR1014751	ATGTCTGGAATGCAAATATCTAGCTACCTTAGGAAGTATCTAGCCGATGAGGACAAAAAAATACGAGAGGAATTCAAAGAAAGCGATCCTAATAACGAAATGATTCTATGGATGCACGAAAAAACGAGAATAACCGAGGAGGACTTGGCGCGCCCATACACCGAGGACGAAGTAAGGGAGCTGTGTTTACGCACCAAAGTAAAAGTCAATATGACCGCTTGGAATTGCTTGTGGGAAGCCAAAAAGAGATTTGATGCAAAAGGACGTTTTGAAAGAAAGTCCGAGGAATTTATCAACCTAATGTATTTGAAAGCGGTGCGCAGGAAGATGGTCCAACCGTATCCGGAGGACTATGTGGCCCAGCGAAGAGAAATTGCTGCCGCGGAGACCAAGAAGGAC…
D.yakuba	HOAP_from_SRR1023127	ATGTCTGGAATGCAAATATCTAGCTACCTGAGGAAGTATCTAGCCGATGAGGACAAAAAAATACGAGAGGAATTCAAAGAAAGCGATCCTAATAACGAAATGATTCTATGGATGCACGAAAAAACGAGAATAACCGAGGAGGACTTGGCGCGCCCATACACCGAGGACGAAGTAAGGGAGCTGTGTTTACGCACCAAAGTAAAAGTCAATATGACCGCTTGGAATTGCTTGTGGGAAGCCAGAAAGAGATTTGATGCAAAAGGACGTTTTGAAAGAAAGTCCGAGGAATTTATCAACCTAATGTATTTGAAAGCGGTGCGCAGGAAGATGGTCCAACCGTATCCGGAGGACTATGTGGCCCAGCGAAGAGAAATTGCTGCCGCGGAGACCAAGAAGGAC…
D.yakuba	HOAP_from_SRR1027854	ATGTCTGGAATGCAAATATCTAGCTACCTTAGGAAGTATCTAGCCGATGAGGACAAAAAAATACGAGAGGAATTCAAAGAAAGCGATCCTAATAACGAAATGATTCTATGGATGCACGAAAAAACGAGAATAACCGAGGAGGACTTGGCGCGCCCATACACCGAGGACGAAGTAAGGGAGCTGTGTTTACGCACCAAAGTAAAAGTCAATATGACCGCTTGGAATTGCTTGTGGGAAGCCAAAAAGAGATTTGATGCAAAAGGACGTTTTGAAAGAAAGTCCGAGGAATTTATCAACCTAATGTATTTGAAAGCGGTGCGCAGGAAGATGGTCCAACCGTATCCGGAGGACTATGTGGCCCAGCGAAGAGAAATTGCTGCCGCGGAGACCAAGAAGGAC…
D.yakuba	HOAP_from_SRR1094122	ATGTCTGGAATGCAAATATCTAGCTACCTTAGGAAGTATCTAGCCGATGAGGACAAAAAAATACGAGAGGAATTCAAAGAAAGCGATCCTAATAACGAAATGATTCTATGGATGCACGAAAAAACGAGAATAACCGAGGAGGACTTGGCGCGCCCATACACCGAGGACGAAGTAAGGGAGCTGTGTTTACGCACCAAAGTAAAAGTCAATATGACCGCTTGGAATTGCTTGTGGGAAGCCAGAAAGAGATTTGATGCAAAAGGACGTTTTGAAAGGAAGTCCGAGGAATTTATCAACCTAATGTATTTGAAAGCGGTGCGCAGGAAGATGGTCCAACCGTATCCGGAGGACTATGTGGCCCAGCGAAGAGAAATTGCTGCCGCGGAGACCAAGAAGGAC…
D.yakuba	HOAP_from_SRR1094311	ATGTCTGGAATGCAAATATCTAGCTACCTTAGGAAGTATCTAGCCGATGAGGACAAAAAAATACGAGAGGAATTCAAAGAAAGCGATCCTAATAACGAAATGATTCTATGGATGCACGAAAAAACGAGAATAACAGAAGAGGACTTGGCGCGCCCATACACCGAGGACGAAGTAAGGGAGCTGTGTTTACGCACCAAAGTAAAAGTCAATATGACCGCTTGGAATTGCTTGTGGGAAGCCAAAAAGAGATTTGATGCAAAAGGACGTTTTGAAAGAAAGTCCGAGGAATTTATCAACCTAATGTATTTGAAAGCGGTGCGCAGGAAGATGGTCCAACCGTATCCGGAGGACTATGTGGCCCAGCGAAGAGAAATTGCTGCCGCGGAGACCAAGAAGGAC…
D.yakuba	HOAP_from_SRR1094456	ATGTCTGGAATGCAAATATCTAGCTACCTTAGGAAGTATCTAGCCGATGAGGACAAAAAAATACGAGAGGAATTCAAAGAAAGCGATCCTAATAACGAAATGATTCTATGGATGCACGAAAAAACGAGAATAACAGAAGAGGACTTGGCGCGCCCATACACCGAGGACGAAGTAAGGGAGCTGTGTTTACGCACCAAAGTAAAAGTCAATATGACCGCTTGGAATTGCTTGTGGGAAGCCAGAAAGAGATTTGATGCAAAAGGACGTTTTGAAAGAAAGTCCGAGGAATTTATCAACCTAATGTATTTGAAAGCGGTGCGCAGGAAGATGGTCCAACCGTATCCGGAGGACTATGTGGCCCAGCGAAGAGAAATTGCTGCCGCGGAGACCAAGAAGGAC…
D.yakuba	HOAP_from_SRR1094579	ATGTCTGGAATGCAAATATCTAGCTACCTTAGGAAGTATCTAGCCGATGAGGACAAAAAAATACGAGAGGAATTCAAAGAAAGCGATCCTAATAACGAAATGATTCTATGGATGCACGAAAAAACGAGAATAACCGAGGAGGACTTGGCGCGCCCATACACCGAGGACGAAGTAAGGGAGCTGTGTTTACGCACCAAAGTAAAAGTCAATATGACCGCTTGGAATTGCCTGTGGGAAGCCAGAAAGAGATTTGATGCAAAAGGACGTTTTGAAAGAAAGTCCGAGGAATTTATCAACCTAATGTATTTGAAAGCGGTGCGCAGGAAGATGGTCCAACCGTATCCGGAGGACTATGTGGCCCAGCGAAGAGAAATTGCTGCCGCGGAGACCAAGAAGGAC…
D.yakuba	HOAP_from_SRR1198285	ATGTCTGGAATGCAAATATCTAGCTACCTTAGGAAGTATCTAGCCGATGAGGACAAAAAAATACGAGAGGAATTCAAAGAAAGCGATCCTAATAACGAAATGATTCTATGGATGCACGAAAAAACGAGAATAACCGAGGAGGACTTGGCGCGCCCATACACCGAGGACGAAGTAAGGGAGCTGTGTTTACGCACCAAAGTAAAAGTCAATATGACCGCTTGGAATTGCTTGTGGGAAGCCAAAAAGAGATTTGATGCAAAAGGACGTTTTGAAAGAAAGTCCGAGGAATTTATCAACCTAATGTATTTGAAAGCGGTGCGCAGGAAGATGGTCCAACCGTATCCGGAGGACTATGTGGCCCAGCGAAGAGAAATTGCTGCCGCGGAGACCAAGAAGGAC…
D.yakuba	HOAP_from_SRR1198286	ATGTCTGGAATGCAAATATCTAGCTACCTTAGGAAGTATCTAGCCGATGAGGACAAAAAAATACGAGAGGAATTCAAAGAAAGCGATCCTAATAACGAAATGATTCTATGGATGCACGAAAAAACGAGAATAACAGAAGAGGACTTGGCGCGCCCATACACCGAGGACGAAGTAAGGGAGCTGTGTTTACGCACCAAAGTAAAAGTCAATATGACCGCTTGGAATTGCTTGTGGGAAGCCAGAAAGAGATTTGATGCAAAAGGACGTTTTGAAAGAAAGTCCGAGGAATTTATCAACCTAATGTATTTGAAAGCGGTGCGCAGGAAGATGGTCCAACCGTATCCGGAGGACTATGTGGCCCAGCGAAGAGAAATTGCTGCCGCGGAGACCAAGAAGGAC…
D.yakuba	HOAP_from_SRR1198287	ATGTCTGGAATGCAAATATCTAGCTACCTTAGGAAGTATCTAGCCGATGAGGACAAAAAAATACGAGAGGAATTCAAAGAAAGCGATCCTAATAACGAAATGATTCTATGGATGCACGAAAAAACGAGAATAACCGAGGAGGACTTGGCGCGCCCATACACCGAGGACGAAGTAAGGGAGCTGTGTTTACGCACCAAAGTAAAAGTCAATATGACCGCTTGGAATTGCTTGTGGGAAGCCAGAAAGAGATTTGATGCAAAAGGACGTTTTGAAAGAAAGTCCGAGGAATTTATCAACCTAATGTATTTGAAAGCAGTGCGCAGGAAGATGGTTCAACCGTATCCGGAGGACTATGTGGCCCAGCGAAGAGAAATTGCTGCCGCGGAGACCAAGAAGGAC…
D.yakuba	HOAP_from_SRR1198288	ATGTCTGGAATGCAAATATCTAGCTACCTTAGGAAGTATCTAGCCGATGAGGACAAAAAAATACGAGAGGAATTCAAAGAAAGCGATCCTAATAACGAAATGATTCTATGGATGCACGAAAAAACGAGAATAACCGAGGAGGACTTGGCGCGCCCATACACCGAGGACGAAGTAAGGGAGCTGTGTTTACGCACCAAAGTAAAAGTCAATATGACCGCTTGGAATTGCTTGTGGGAAGCCAGAAAGAGATTTGATGCAAAAGGACGTTTTGAAAGAAAGTCCGAGGAATTTATCAACCTAATGTATTTGAAAGCAGTGCGCAGGAAGATGGTTCAACCGTATCCGGAGGACTATGTGGCCCAGCGAAGAGAAATTGCTGCCGCGGAGACCAAGAAGGAC…
D.yakuba	HOAP_from_SRR1198291	ATGTCTGGAATGCAAATATCTAGCTACCTTAGGAAGTATCTAGCCGATGAGGACAAAAAAATACGAGAGGAATTCAAAGAAAGCGATCCTAATAACGAAATGATTCTATGGATGCACGAAAAAACGAGAATAACCGAGGAGGACTTGGCGCGCCCATACACCGAGGACGAAGTAAGGGAGCTGTGTTTACGCACCAAAGTAAAAGTCAATATGACCGCTTGGAATTGCTTGTGGGAAGCCAGAAAGAGATTTGATGCAAAAGGACGTTTTGAAAGAAAGTCCGAGGAATTTATCAACCTAATGTATTTGAAAGCGGTGCGCAGGAAGATGGTCCAACCGTATCCGGAGGACTATGTGGCCCAGCGAAGAGAAATTGCTGCCGCGGAGACCAAGAAGGAC…
D.yakuba	HOAP_from_SRR1198292	ATGTCTGGAATGCAAATATCTAGCTACCTTAGGAAGTATCTAGCCGATGAGGACAAAAAAATACGAGAGGAATTCAAAGAAAGCGATCCTAATAACGAAATGATTCTATGGATGCACGAAAAAACGAGAATAACCGAGGAGGACTTGGCGCGCCCATACACCGAGGACGAAGTAAGGGAGCTGTGTTTACGCACCAAAGTAAAAGTCAATATGACCGCTTGGAATTGCTTGTGGGAAGCCAAAAAGAGATTTGATGCAAAAGGACGTTTTGAAAGGAAGTCCGAGGAATTTATCAACCTAATGTATTTGAAAGCGGTGCGCAGGAAGATGGTCCAACCGTATCCGGAGGACTATGTGGCCCAGCGAAGAGAAATTGCTGCCGCGGAGACCAAGAAGGAC…
