# Supplementary material for: Adaptive evolution of an essential telomere protein restricts telomeric retrotransposons
Source: eLife. 2020 Dec 22;9:e60987. doi: 10.7554/eLife.60987 (PMC7755394; doi:10.7554/eLife.60987)
Supplement: Supplementary file 2. [file elife-60987-supp2.xlsx]

## Sheet: Sheet1
Supplementary File 2. Quantification of the homozygous : heterozygous ratio of progeny from self-crossed heterozygous HOAP[mel] or self-crossed heterozygous HOAP[yak] parents.
	progeny genotype counts		fraction homozygotes
	homozygotes	heterozygotes
HOAP[mel]/TM3 x HOAP[mel]/TM3	1035	2508	0.29
HOAP[yak]/TM3 x HOAP[yak]/TM3	829	1864	0.31*
(TM3 is a third chromosome balancer)			*binomial probabilty of 829 or fewer = 0.98
