# Supplementary material for: Adaptive evolution of an essential telomere protein restricts telomeric retrotransposons
Source: eLife. 2020 Dec 22;9:e60987. doi: 10.7554/eLife.60987 (PMC7755394; doi:10.7554/eLife.60987)
Supplement: Supplementary file 3. [file elife-60987-supp3.xlsx]

## Sheet: Sheet1
Supplementary File 3. Quantification of telomere associations (but not necessarily telomere fusions) across genotypes.
genotype	individual	#nuclei_without_Telomere_Associations	#nuclei_with_Telomere_Associations	total #mitotic_nuclei
cav[1]	1	11	34	45
cav[1]	2	13	40	53
cav[1]	3	13	28	41
Total		37	102	139	percent of TAs = 73%
HOAP[mel]	1	82	11	93
HOAP[mel]	2	114	12	126
HOAP[mel]	3	60	3	63
Total		256	26	282	percent of TAs = 9%
HOAP[yak]	1	33	9	42
HOAP[yak]	2	63	9	72
HOAP[yak]	3	57	9	66
Total		153	27	180	percent of TAs = 15%
Chi-square statistics	p-value
cav[1] vs HOAP[mel]	2.2e-16***
cav[1] vs HOAP[yak]	2.2e-16***
HOAP[mel] vs HOAP[yak]	0.08 (N.S.)
