# Supplementary material for: Adaptive evolution of an essential telomere protein restricts telomeric retrotransposons
Source: eLife. 2020 Dec 22;9:e60987. doi: 10.7554/eLife.60987 (PMC7755394; doi:10.7554/eLife.60987)
Supplement: Supplementary file 4. [file elife-60987-supp4.xlsx]

## Sheet: Sheet1
Supplementary File 4. Primer sequences referenced in the Materials and Methods.
Forward	Reverse	Purpose
CAAATGGACCCACCAATTCCGAGAG	GAGACCGAGATCAACGAGAATAGCGTG	detect Flag-tagged D. melanogaster cav/HOAP
CAAATGGACCCACCAATTCCGAGAG	TCACCGTCATGGTCTTTGTAGTCCAT	detect Flag-tagged D. yakuba cav/HOAP
CGAGGACCAAGCAAACACAAATCTTAG	ATATGGACATCAGGCTATTGAGGTGACGT	detect native cav/HOAP, negative control primers for homozygous transgenic lines
GGGTCTGAGGTCCGGGTTTGGTTTAC	CGGACAAGAAGCGCCAGCATATATG	PCR product for sequence verification of cav/HOAP region, primers anneal outside homology arms
GATCATGACATCGATTACAAGGATGACGATGA		sequencing primer cav/HOAP region
TTAACCGACTTCTACCGTTTTTGGT		sequencing primer cav/HOAP region
CTAGAATCGAGCTAAACCATTAAAATC		sequencing primer cav/HOAP region
CTGAAGTCCGGCCTAGTGTTCTGA	CTAGCATTCGGAGTCGCTGTTCAT	detect cav region deletion after guide RNA-only injection.
GAAAGGGCGGCCGCTCAAGGAAGTTAGGGCTCATGTTAGGAG	GAAAGGGGATCCCGATGAAGTGAAGATGACAATTGCGGT	primers for amplifying the rescue transgene plus 5' and 3' flank plus Not1 (F) and BamHI (R) restriction sites and "cap" GAAAGG
GTATTCATTTCCATGACCCCAACG	GAGGGAATTGTGAAGATGGGTTCC	qPCR primers for amplifying HeT-A
ATGACCATCCGCCCAGCATAC	GTTCTGCATGAGCAGGACCTCC	qPCR primers for control locus, rp49
GCCTCCATCACCGATGTGTCG	TGGCGGCTATCTTTCTGTGGCT	detect HA-tagged D. melanogaster HipHop
CAAGATTCAGACAATGTGCCCACTACCAG	TGGCGGCTATCTTTCTGTGGCT	detect native hiphop, negative control primers for homozygous transgenic line
GCCGTCGTGTTGCTCCTTTTCGTAT	CCAGAGAGGCGGCTTTTGAACTTCG	PCR product for sequence verification of HA-HipHop region, primers anneal outside homology arms
	TGGCGGCTATCTTTCTGTGGCT	sequencing primer HA-HipHip region
	TCCATTTGCTGCCCAGAAAGGTGA	sequencing primer HA-HipHip region
CAACAGCTCCCACGAGTCCGATAATG		sequencing primer HA-HipHip region
GCAGGAGCACCAATAGATAGCCGA		sequencing primer HA-HipHip region
CAGACGAGACGAACGTATGAACAATGAATGAC		sequencing primer HA-HipHip region
GTGGCGGGACAATTGGCTTCATG		sequencing primer HA-HipHip region
GGAACCCATCTTCAGAATTCCCTC	GTGGATGCGGAACAGAATTT	amplify Het-A probe for hybridization to polytene chromosomes
