# Supplementary material for: Adaptive evolution of an essential telomere protein restricts telomeric retrotransposons
Source: eLife. 2020 Dec 22;9:e60987. doi: 10.7554/eLife.60987 (PMC7755394; doi:10.7554/eLife.60987)
Supplement: Supplementary file 5. [file elife-60987-supp5.xlsx]

## Sheet: Sheet1
Supplementary File 5. Output of small RNA species mapping
trangene	replicate	#small_RNA_from_genes_total	#small_RNA_from_gene(sense_orientation)	#small_RNA_from_tRNA	#small_RNA_from_miRNA	#small_RNA_from_rDNA	#small_RNA_from_ncRNA	#small_RNA_from_miscRNA	total
HOAP[mel]	1	1092243	794766	51106	1633238	1209062	2101947	165896	18795989
HOAP[mel]	2	1215733	889827	71922	1762042	1441142	2511617	178045	20567687
HOAP[mel]	3	1080343	773574	71265	1873606	1358466	2225543	178185	19078578
HOAP[yak]	1	1370177	1013923	87796	2072048	2082950	2417290	300584	24947092
HOAP[yak]	2	1423440	1068509	61114	2128067	1853405	2487596	201109	25173917
HOAP[yak]	3	1552157	1170910	69425	2172645	2013360	2739780	256139	27079499
population		#small_RNA_from_genes_total(%)	#small_RNA_from_gene_sense_orientation(%)	#small_RNA_from_tRNA(%)	#small_RNA_from_miRNA(%)	#small_RNA_from_rDNA(%)	#small_RNA_from_ncRNA(%)	#small_RNA_from_miscRNA(%)	total
HOAP[mel]	1	5.81104	4.22838	0.271898	8.68929	6.43255	11.183	0.882614	18795989
HOAP[mel]	2	5.91089	4.32633	0.349684	8.56704	7.00683	12.2115	0.865654	20567687
HOAP[mel]	3	5.6626	4.05467	0.373534	9.82047	7.12037	11.6651	0.933953	19078578
HOAP[yak]	1	5.49233	4.06429	0.351929	8.30577	8.34947	9.68967	1.20489	24947092
HOAP[yak]	2	5.65442	4.24451	0.242767	8.45346	7.3624	9.88164	0.798878	25173917
HOAP[yak]	3	5.73185	4.32397	0.256375	8.02321	7.435	10.1175	0.945878	27079499
